# Supplementary material for: Accuracy of a Wrist-Worn Wearable Device for Monitoring Heart Rates in Hospital Inpatients: A Prospective Observational Study
Source: PubMed Central journal article supplement (PMC5050383; doi:10.2196/jmir.6025), 2016-09-20

W002

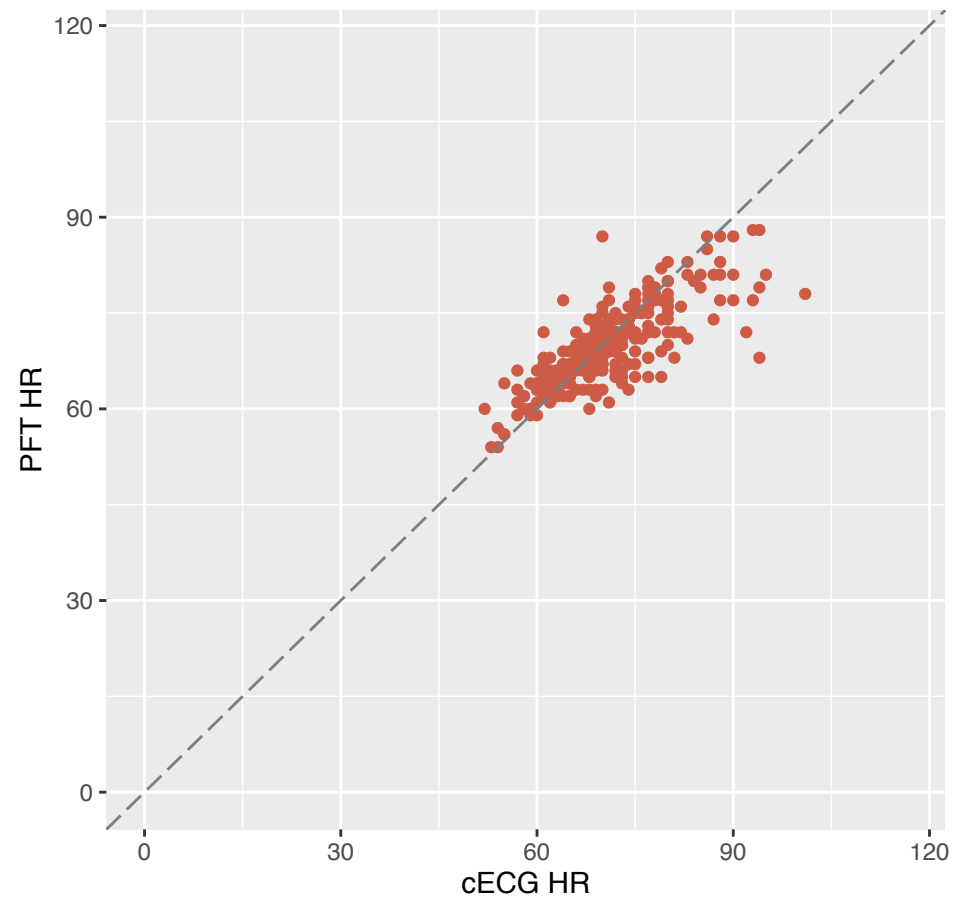

W002

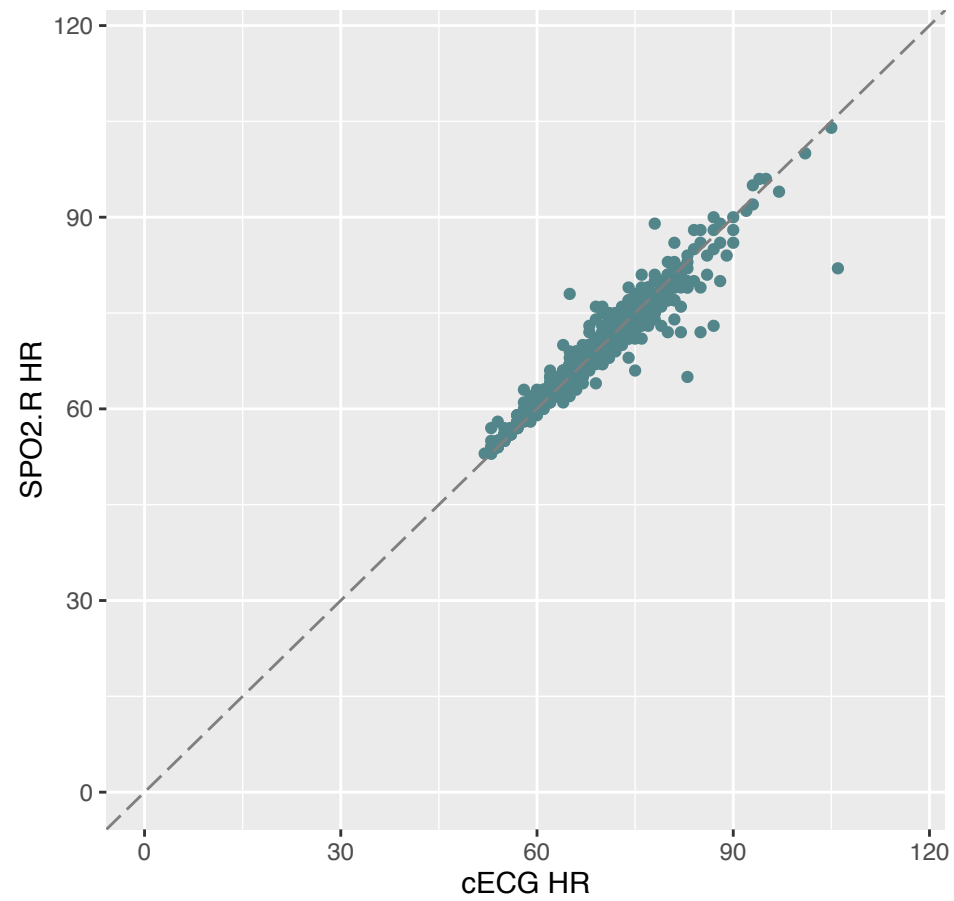

W004

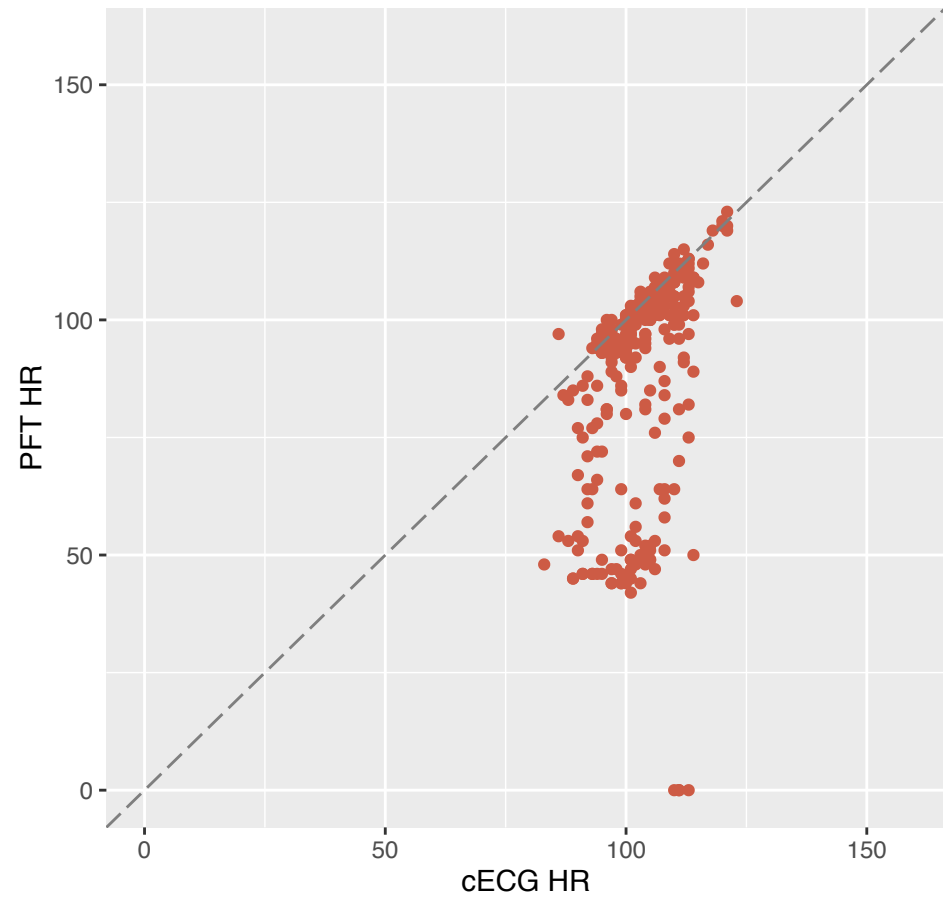

W004

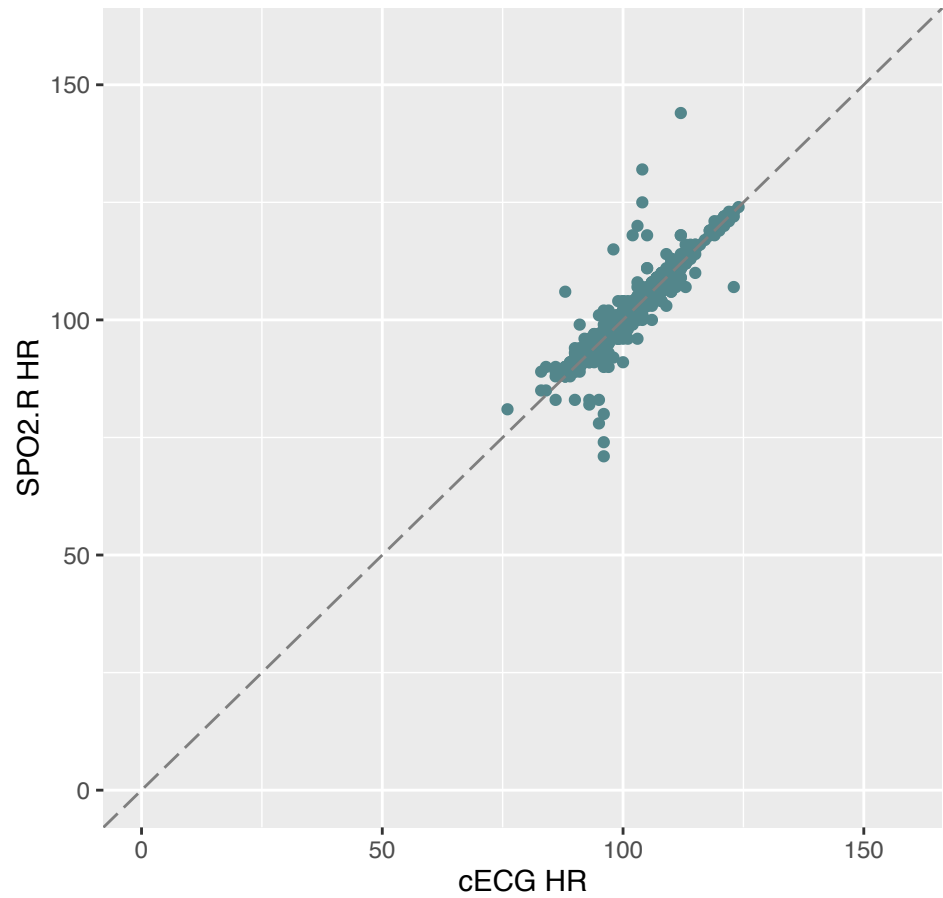

W005

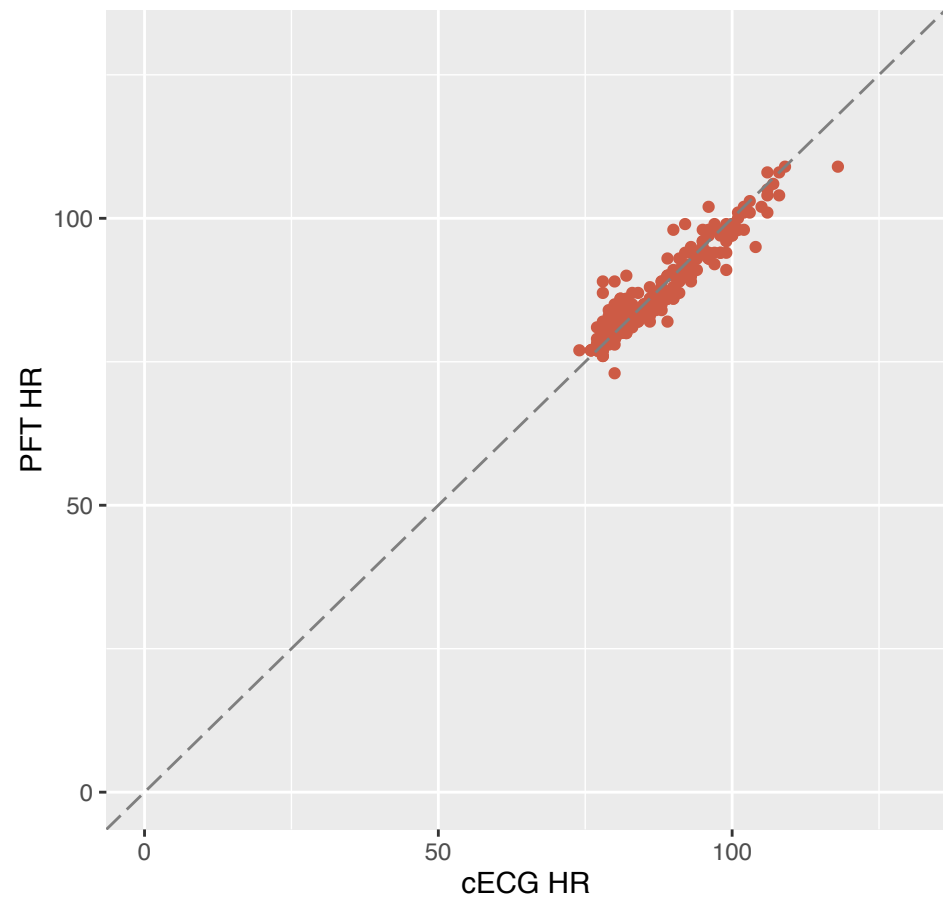

W005

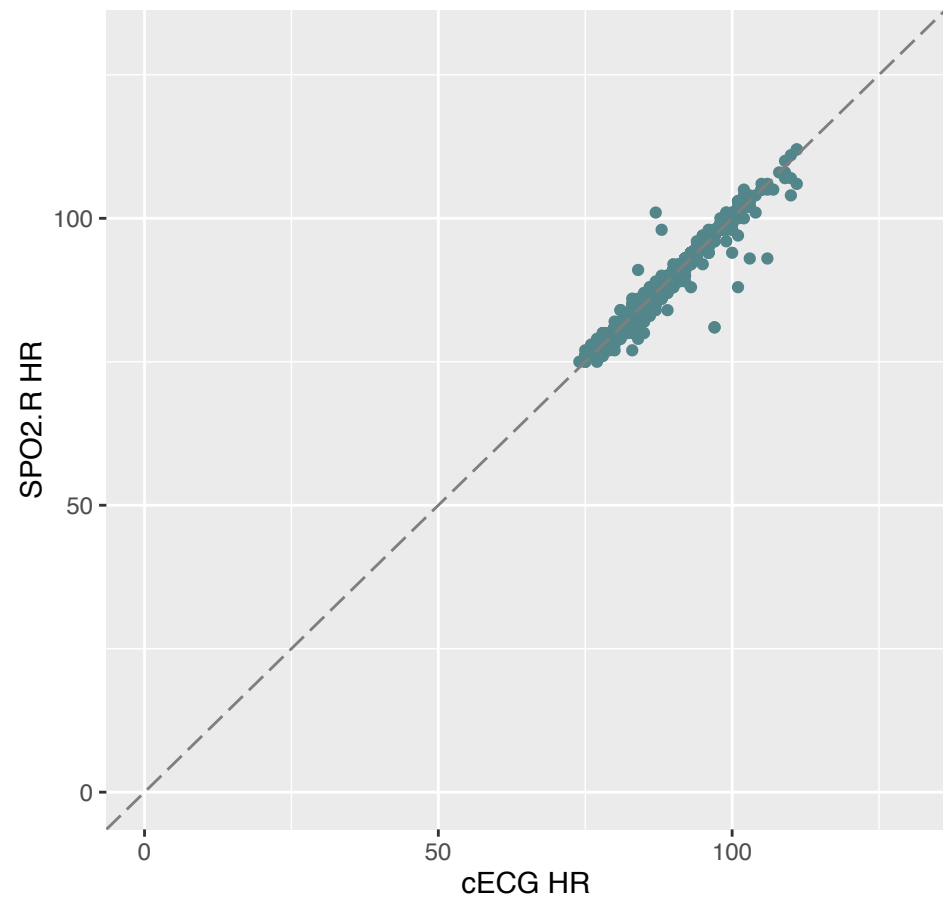

W006

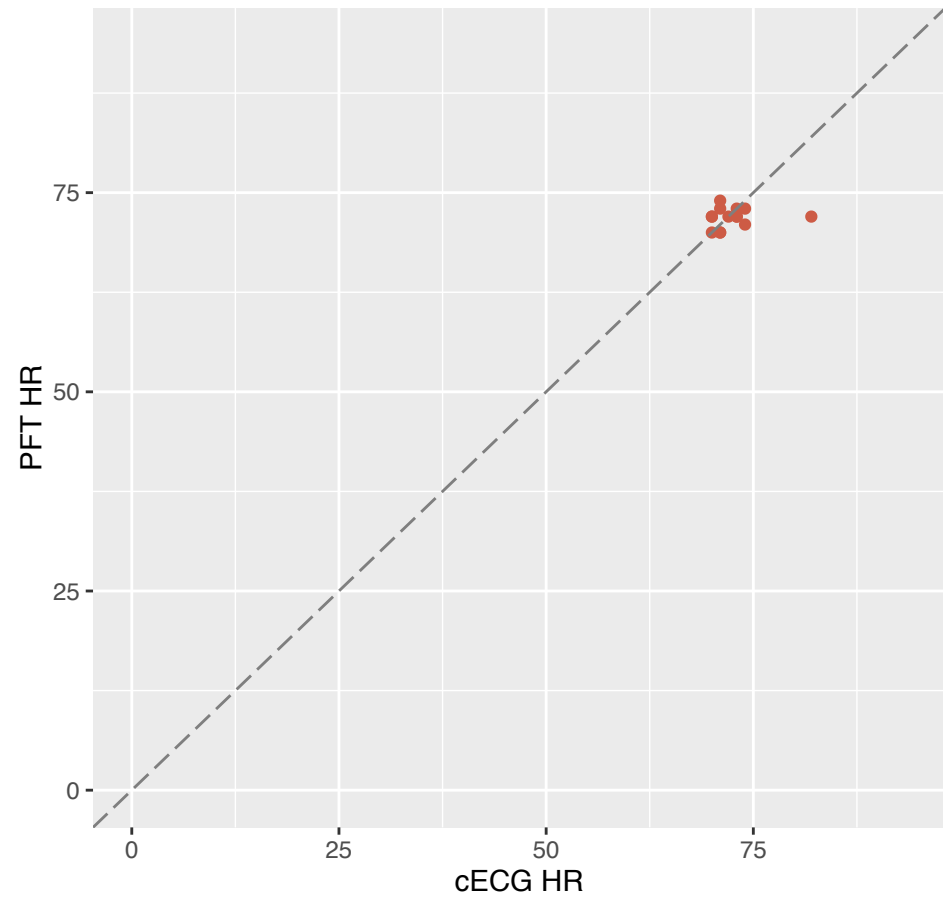

W006

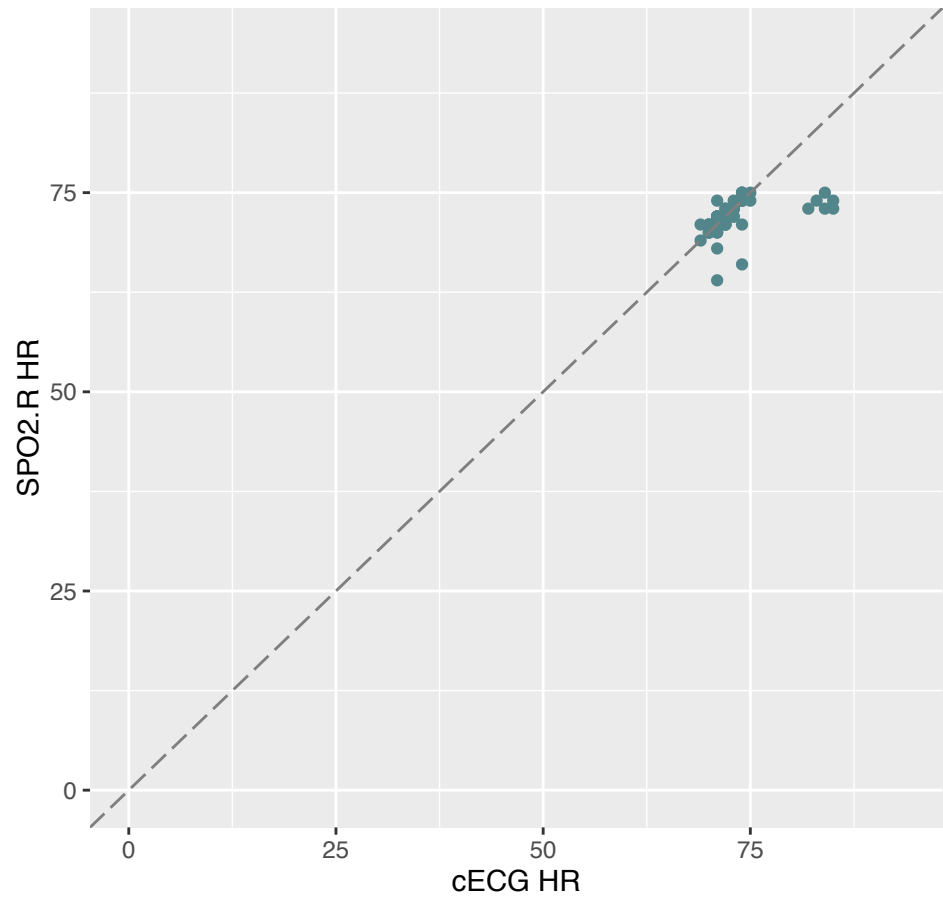

W007

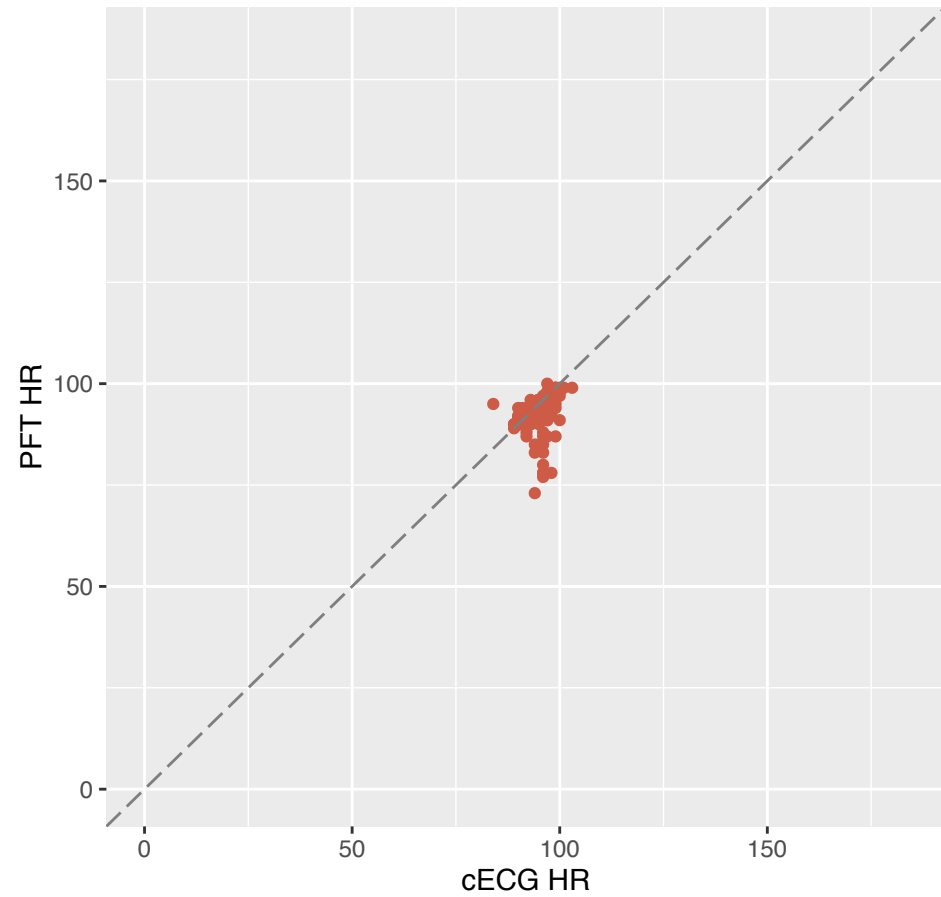

W007

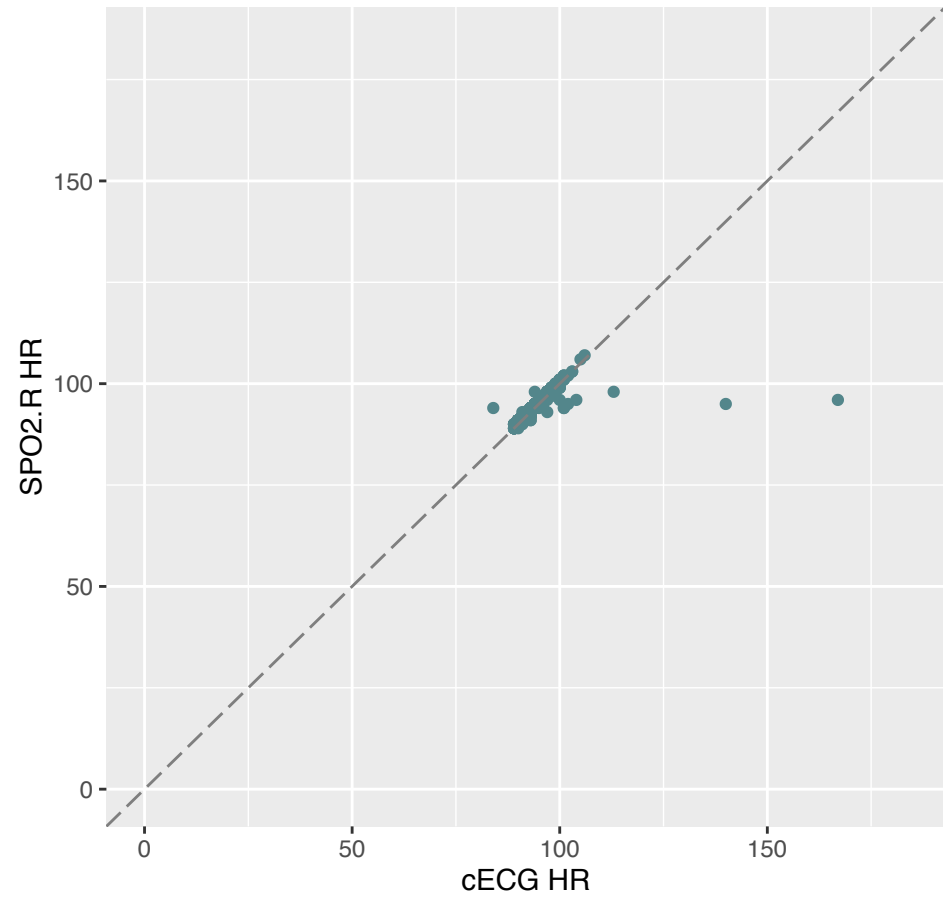

W008

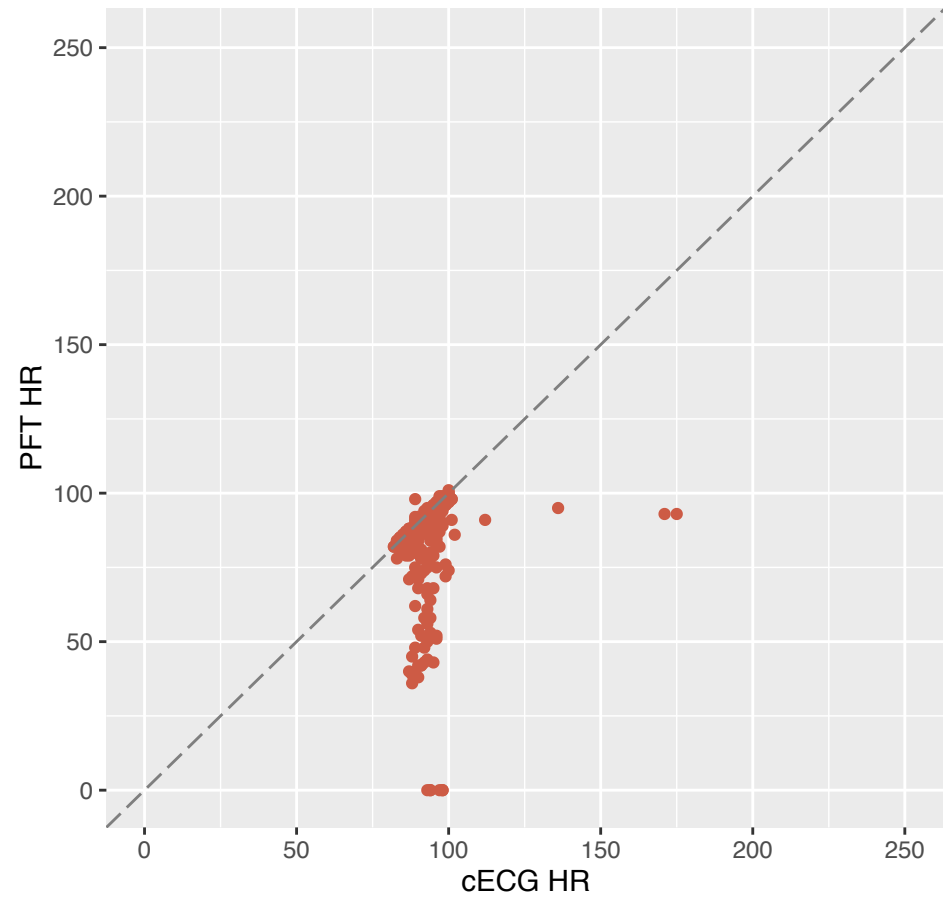

W008

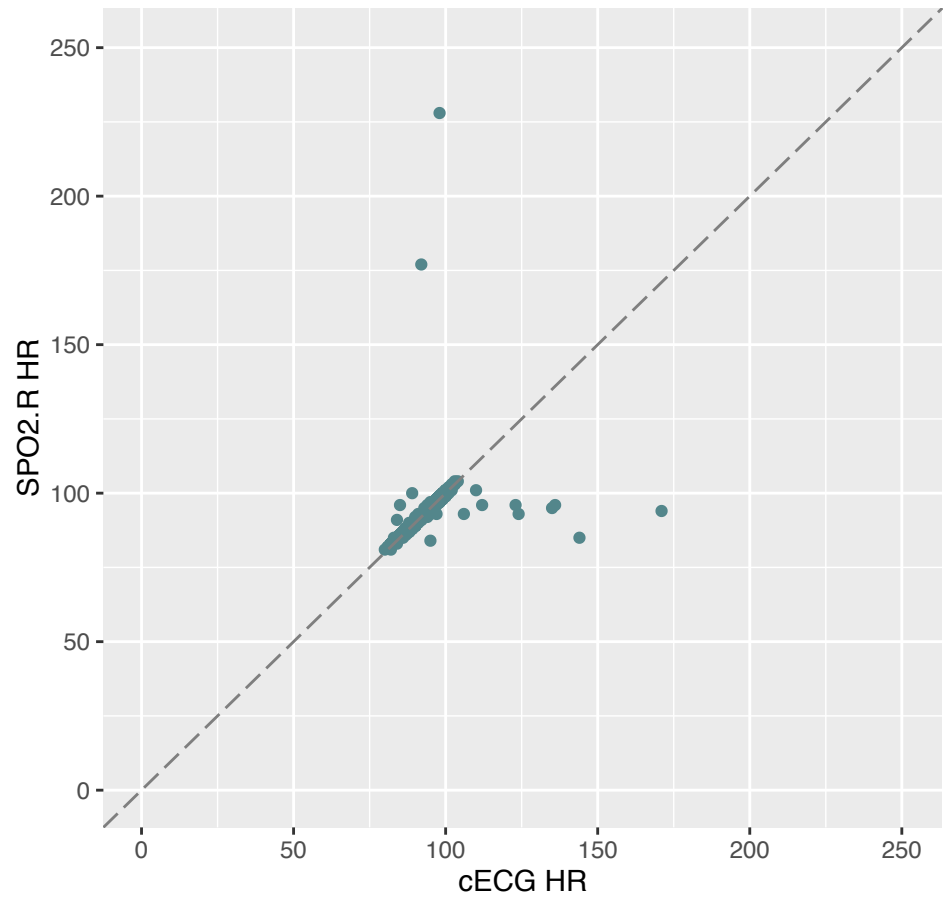

W009

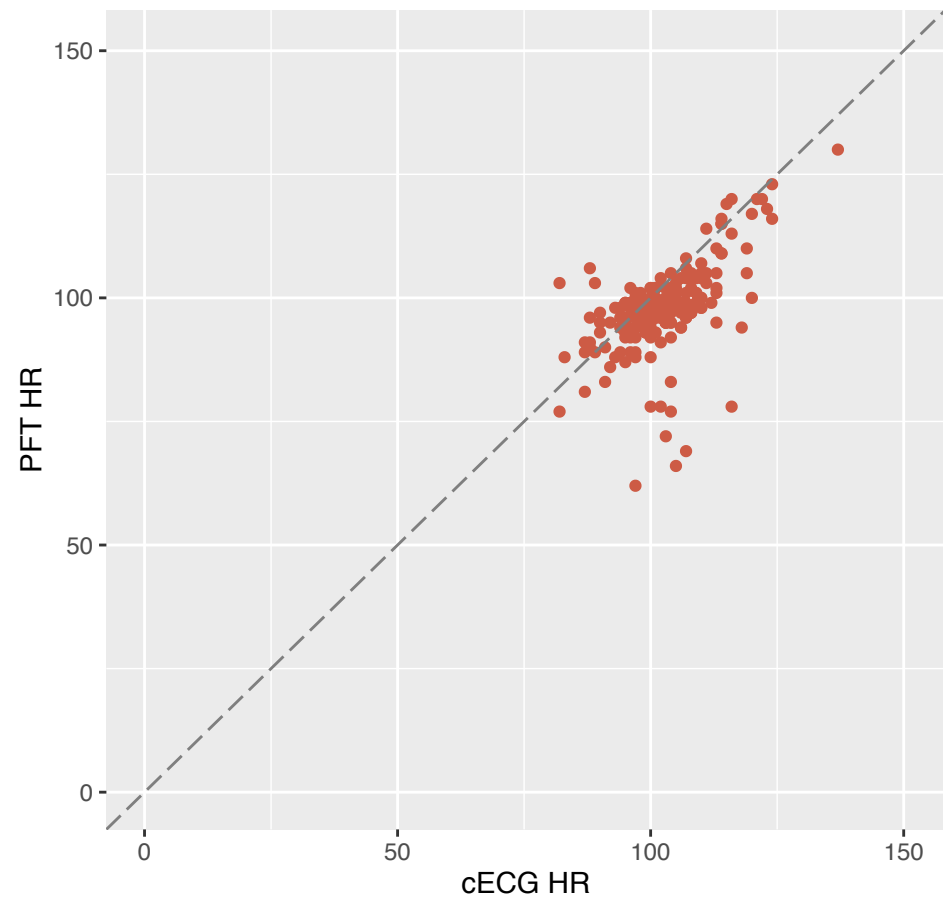

W009

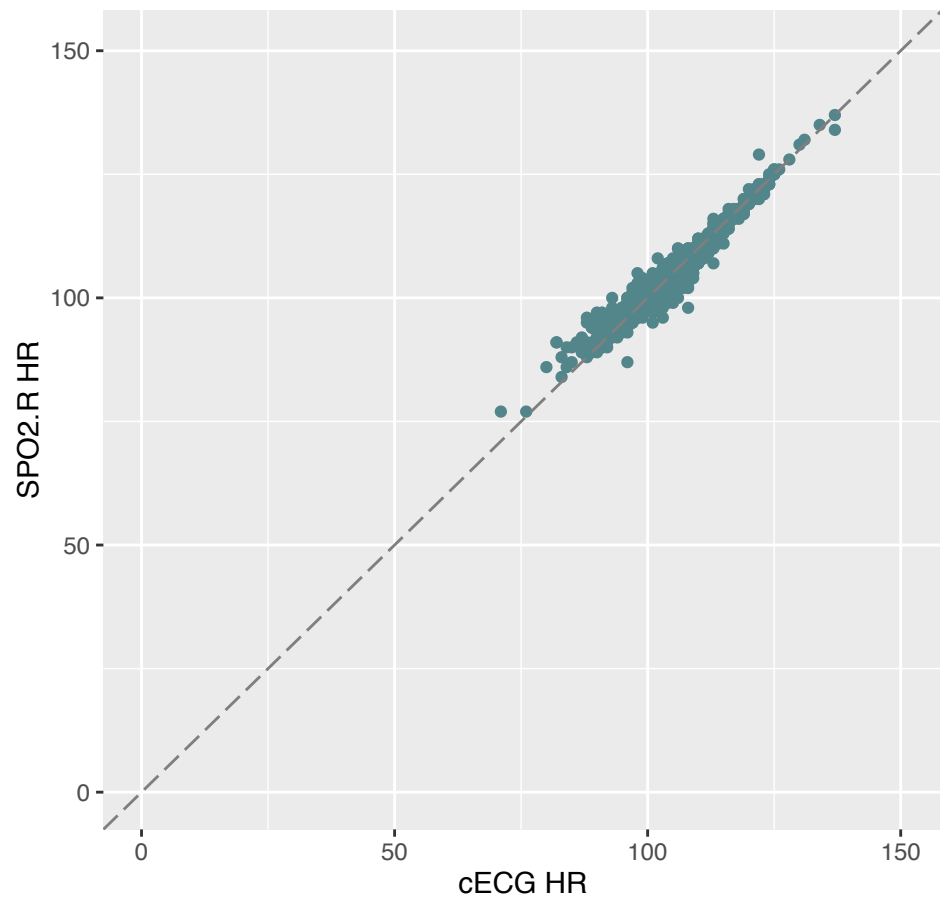

W010

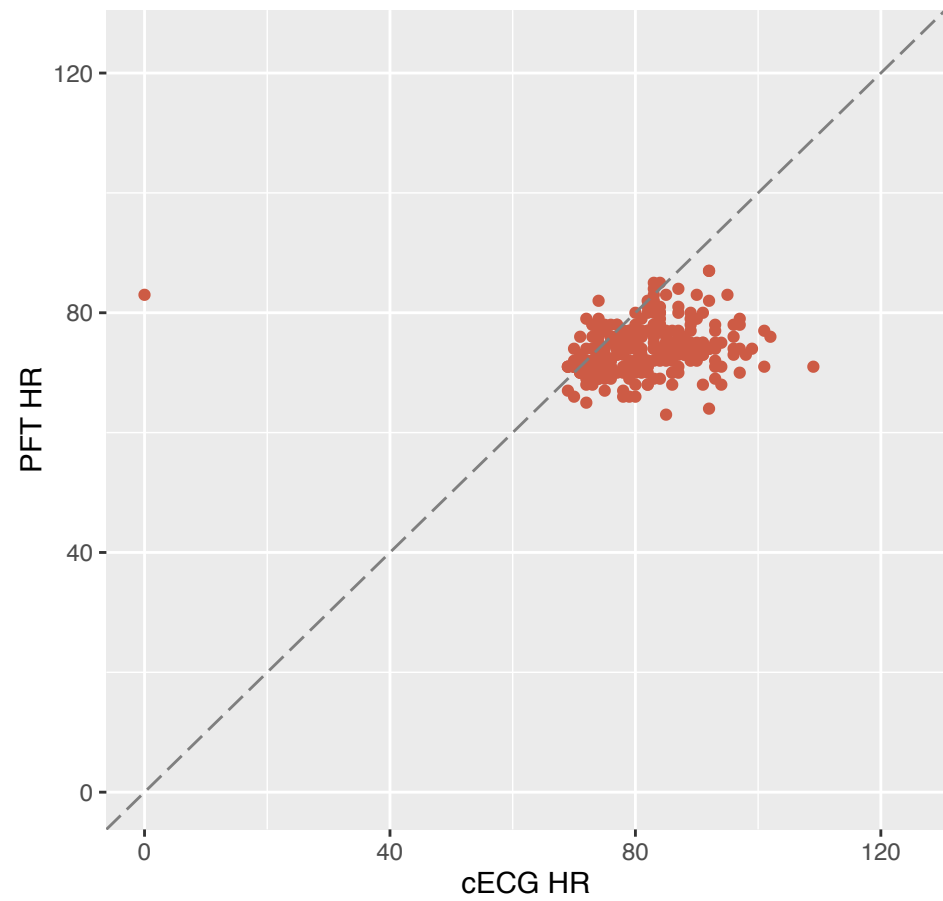

W010

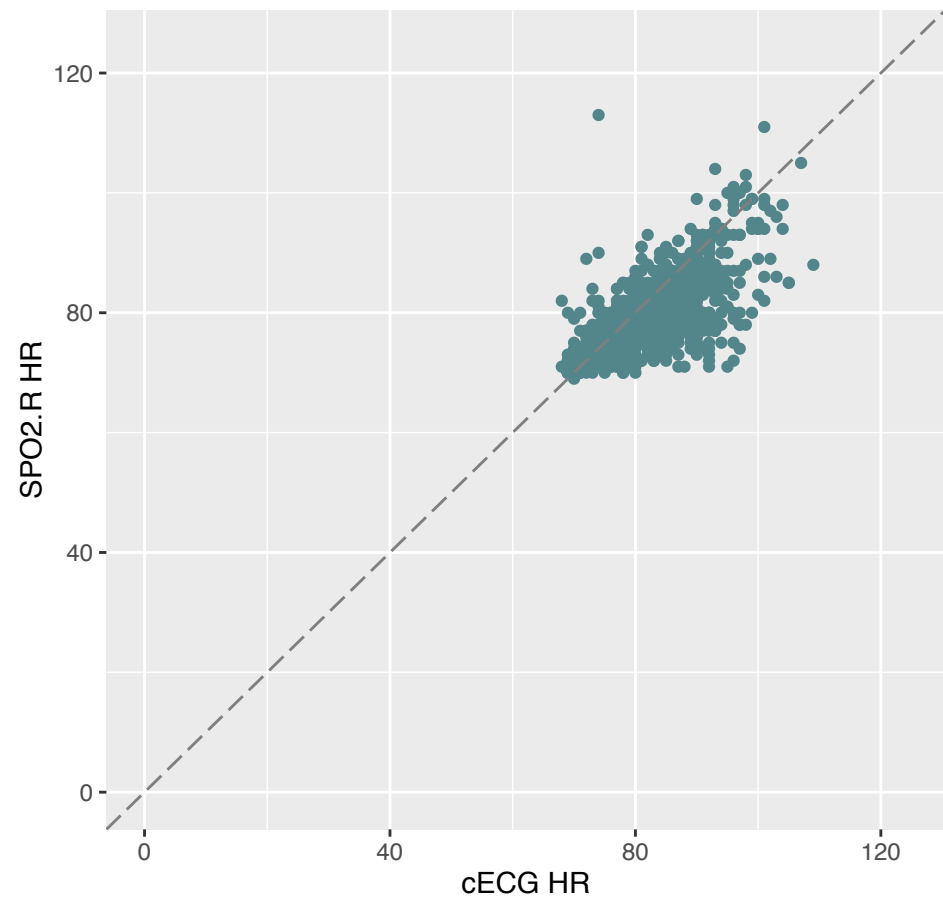



W011

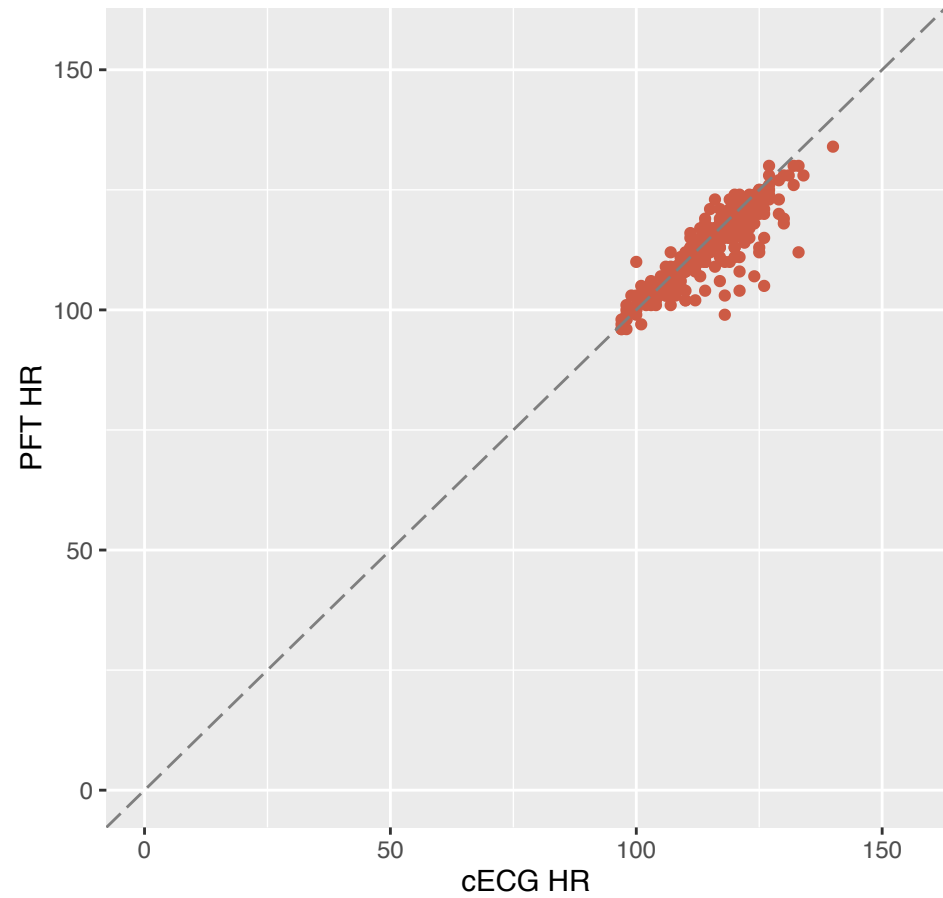

W011

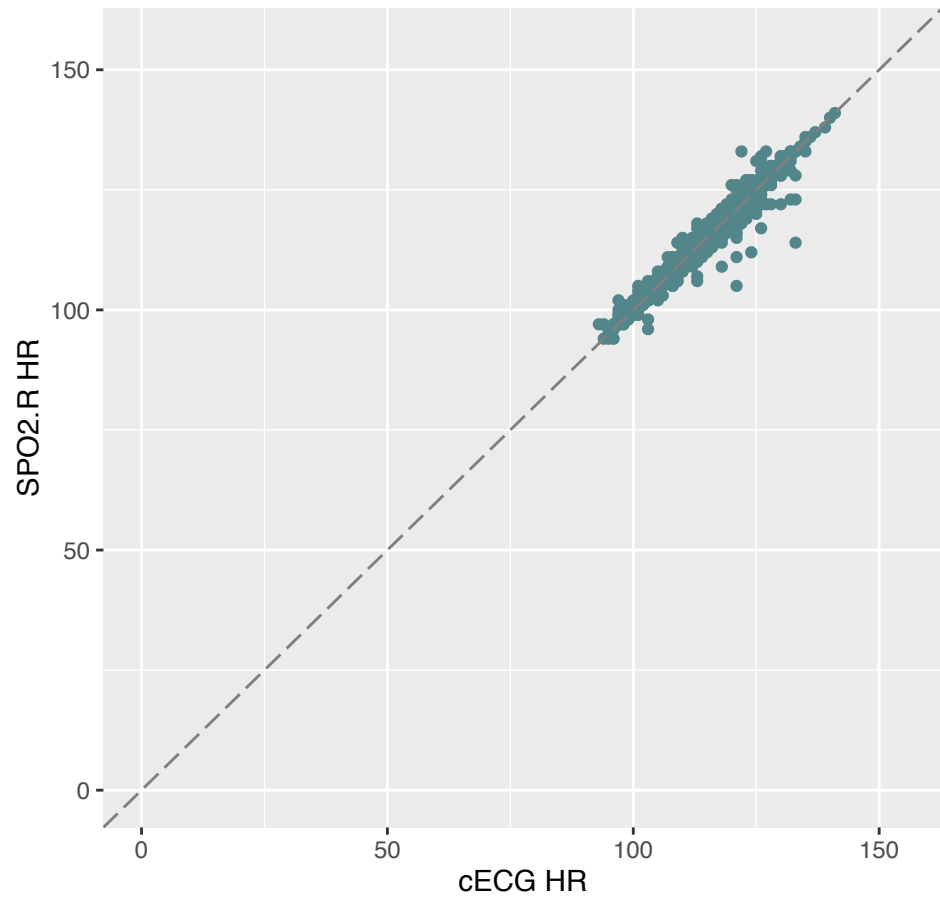

W012

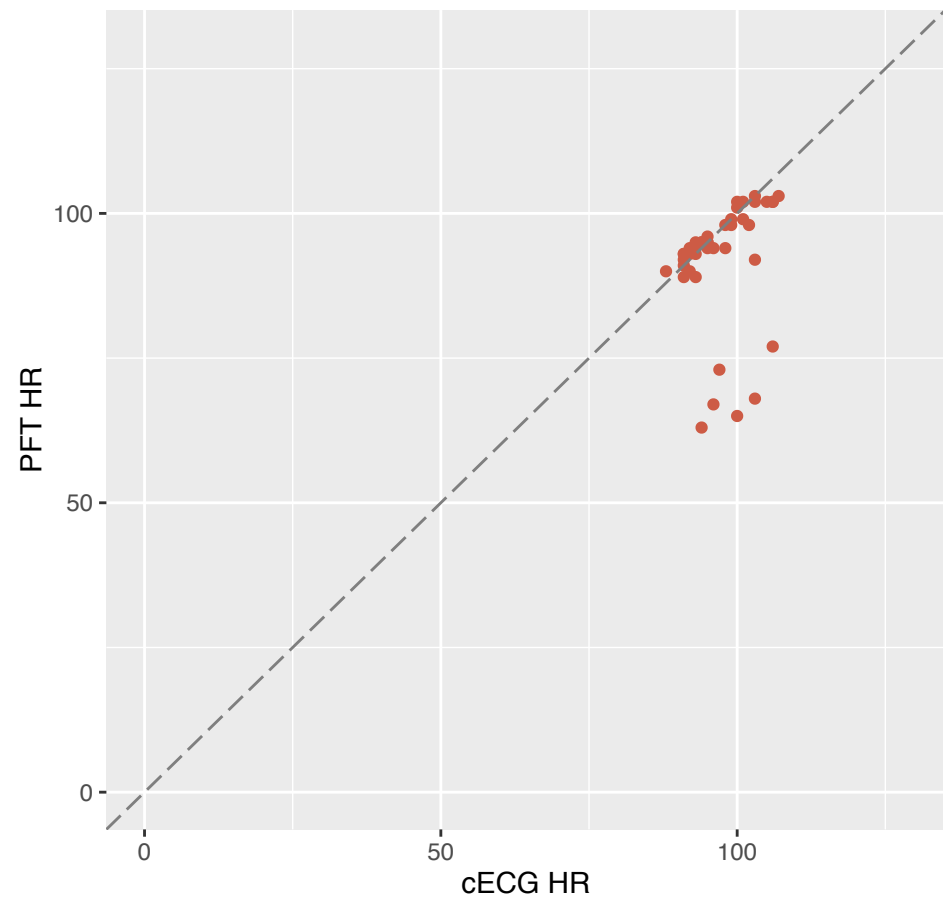

W012

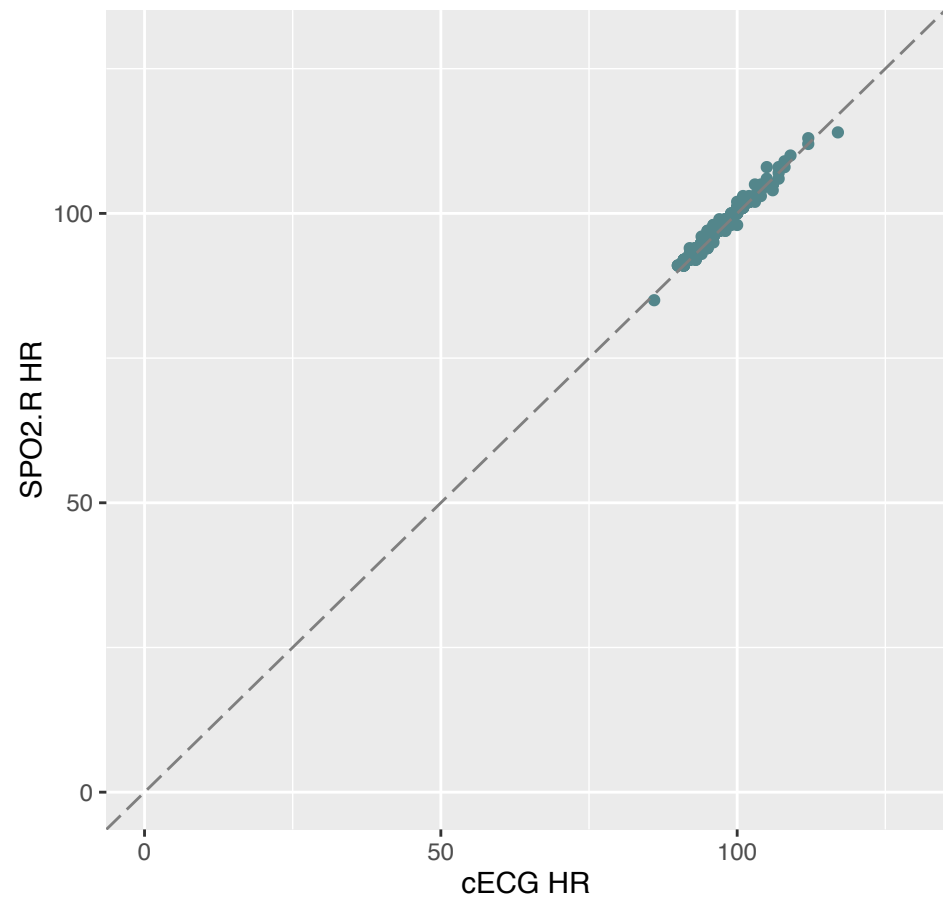

W013

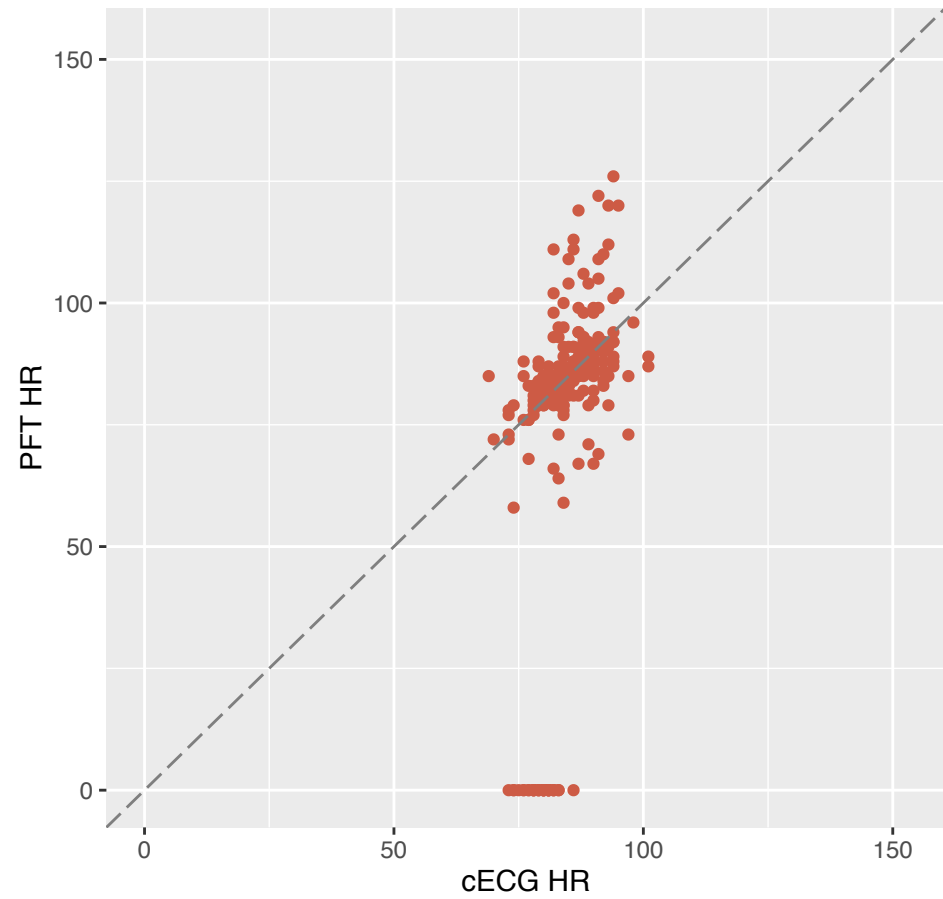

W013

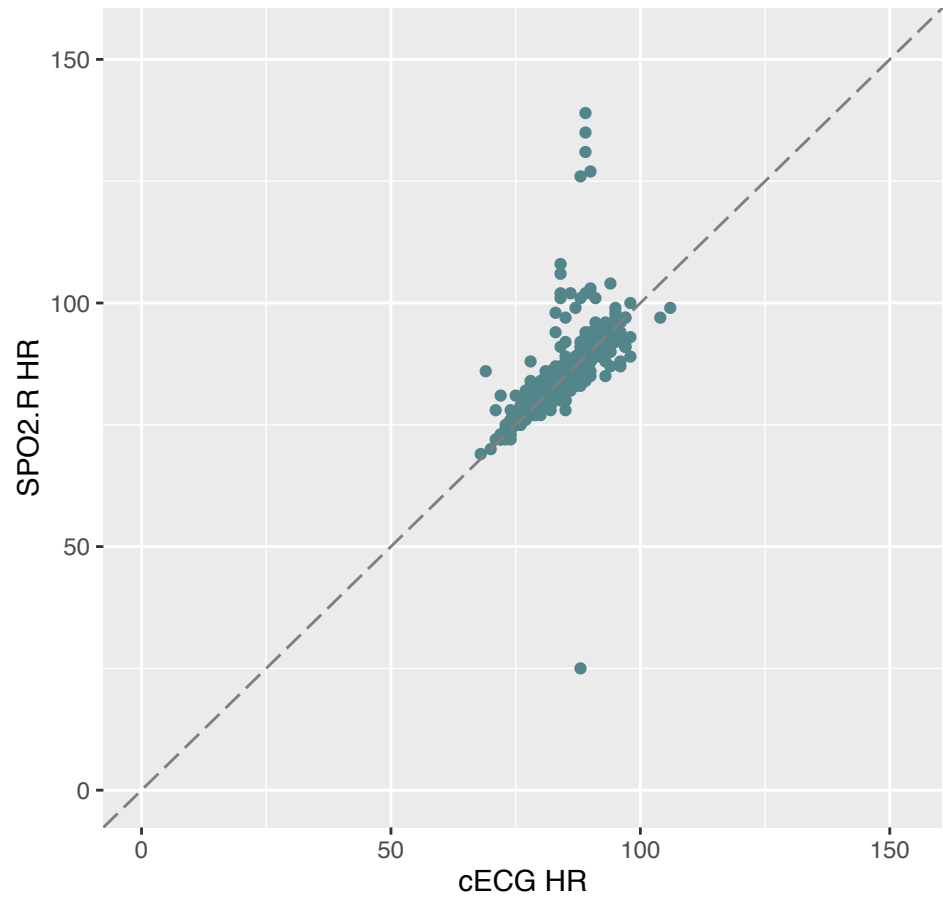

W014

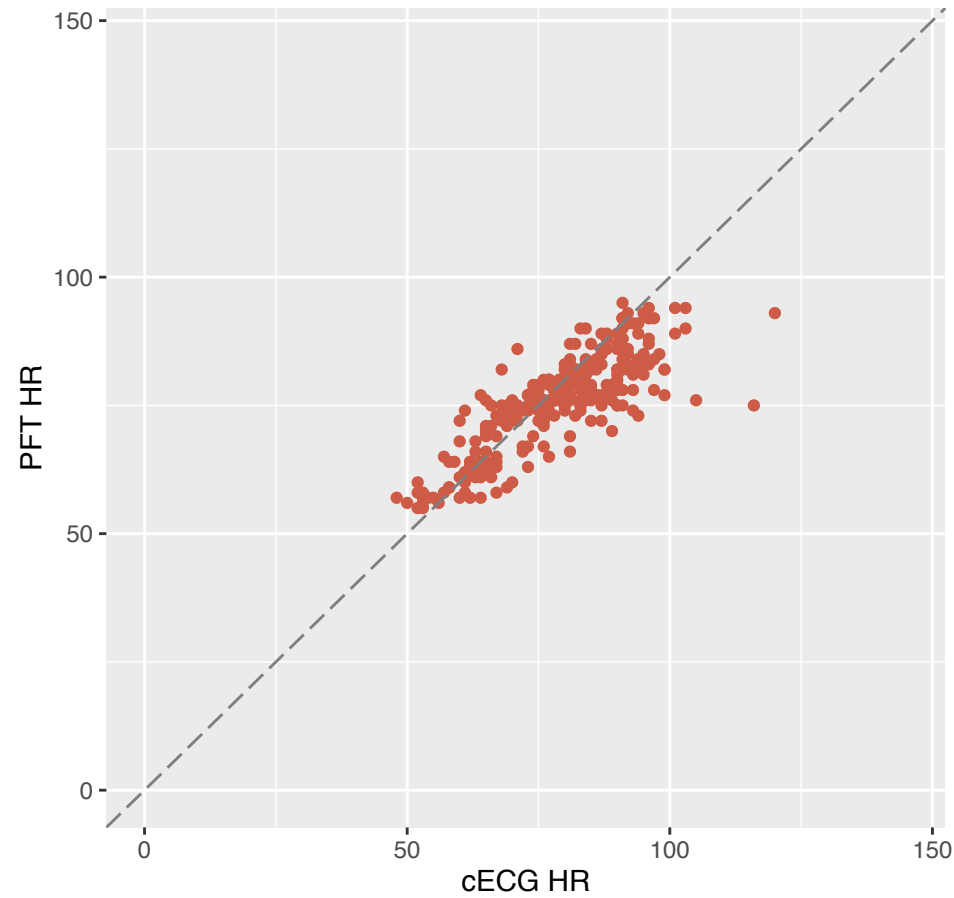

W014

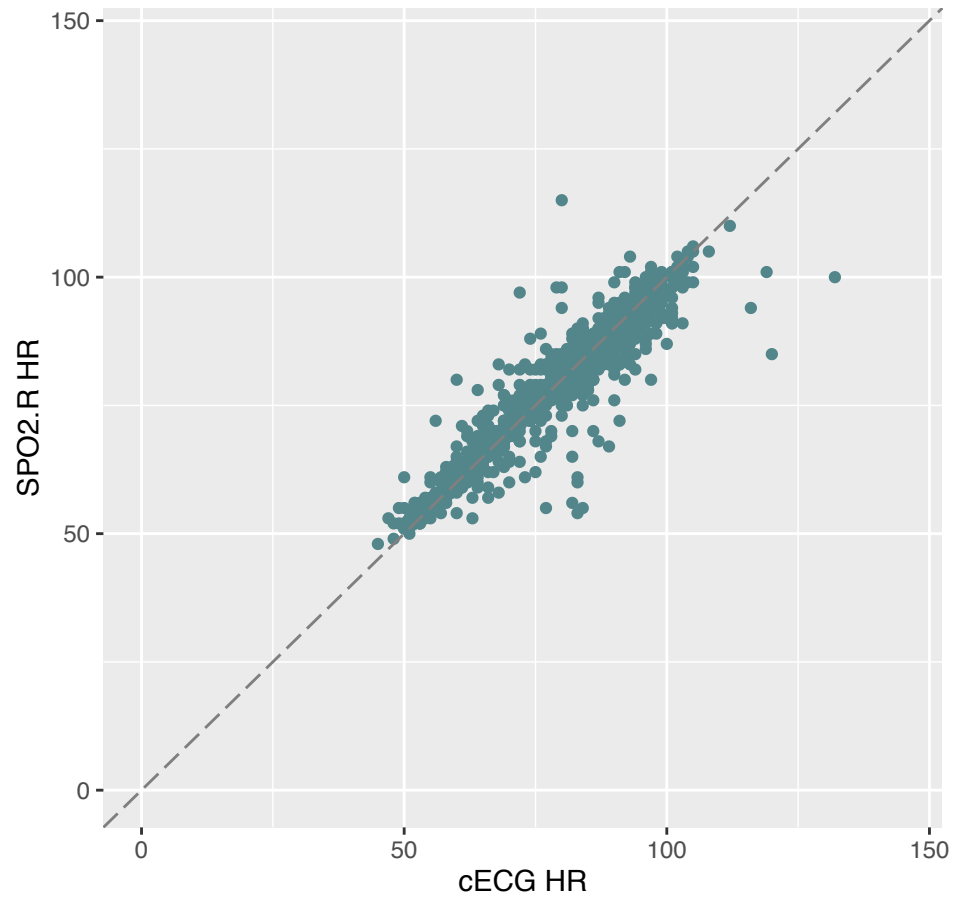

W015

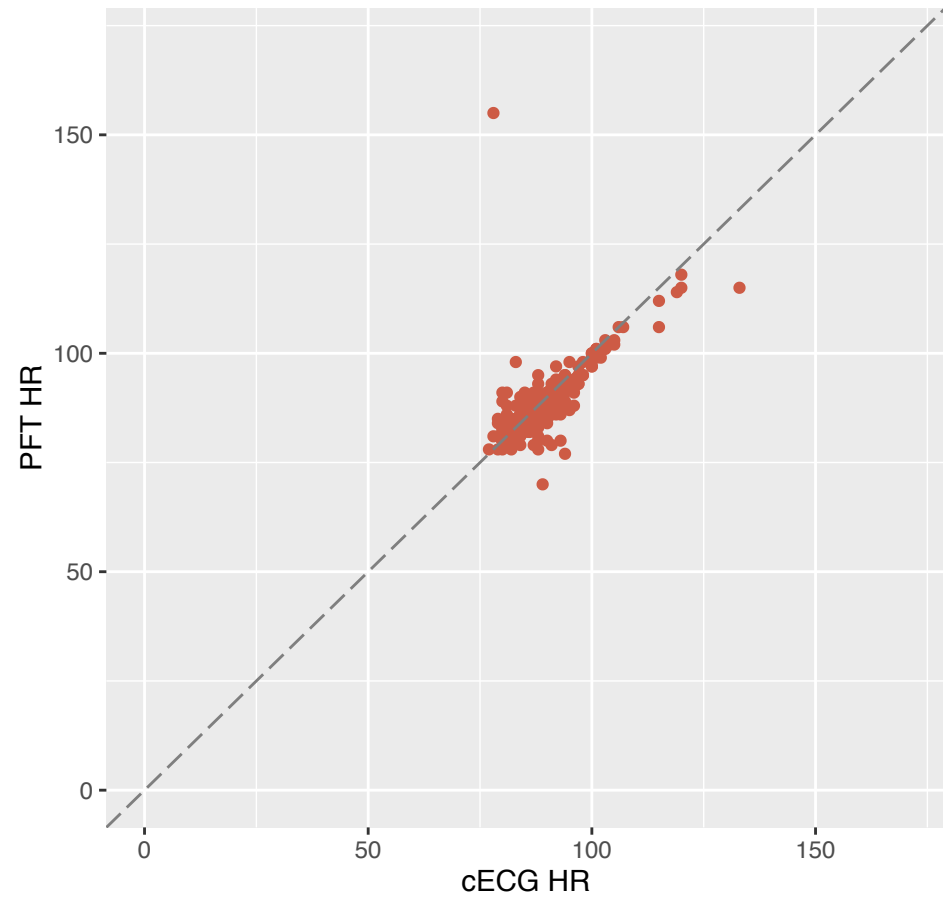

W015

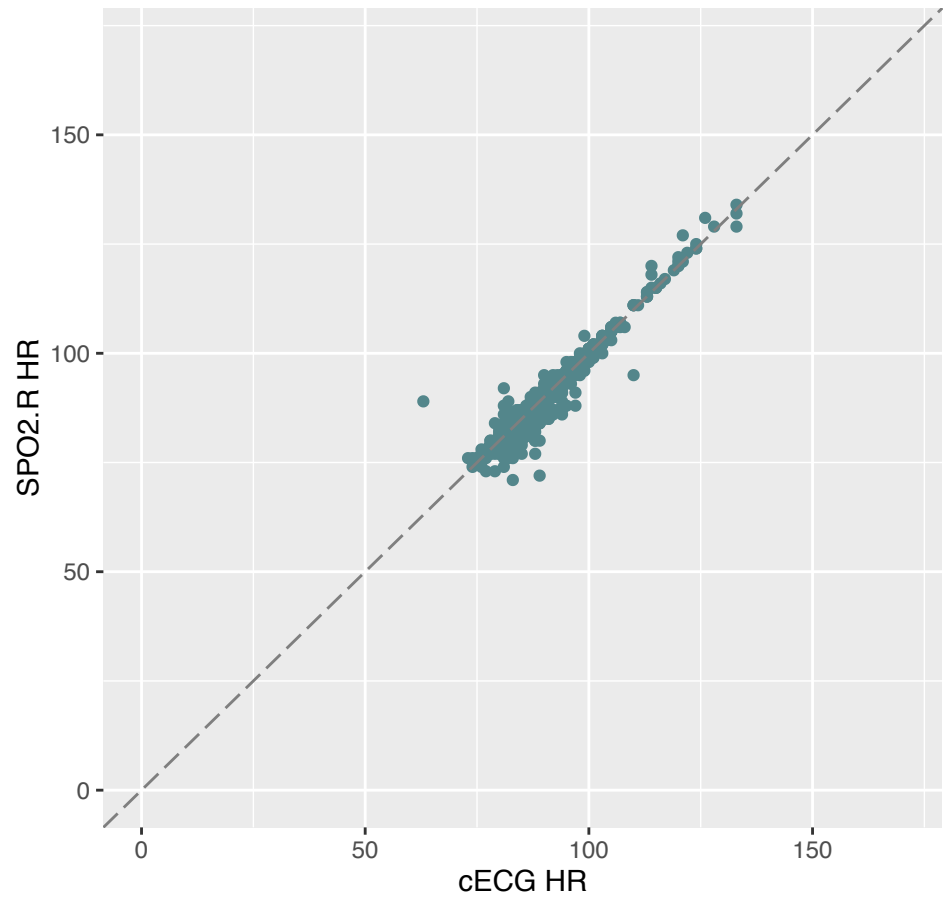

W016

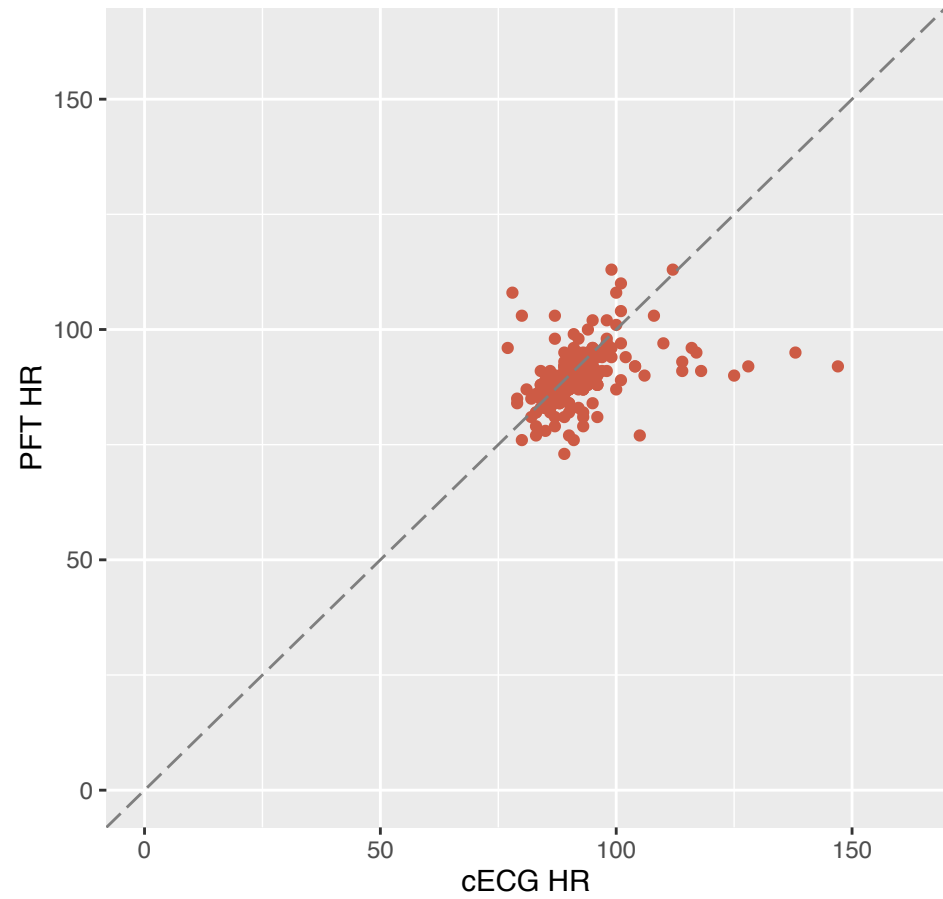

W016

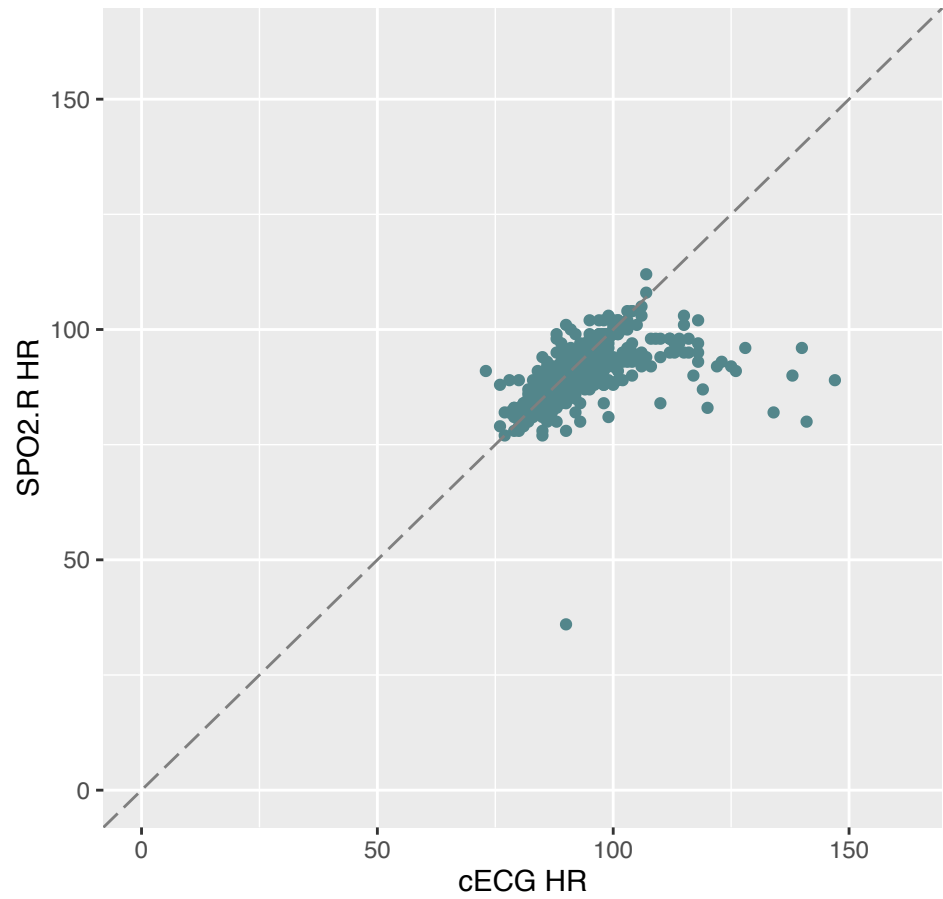

W017

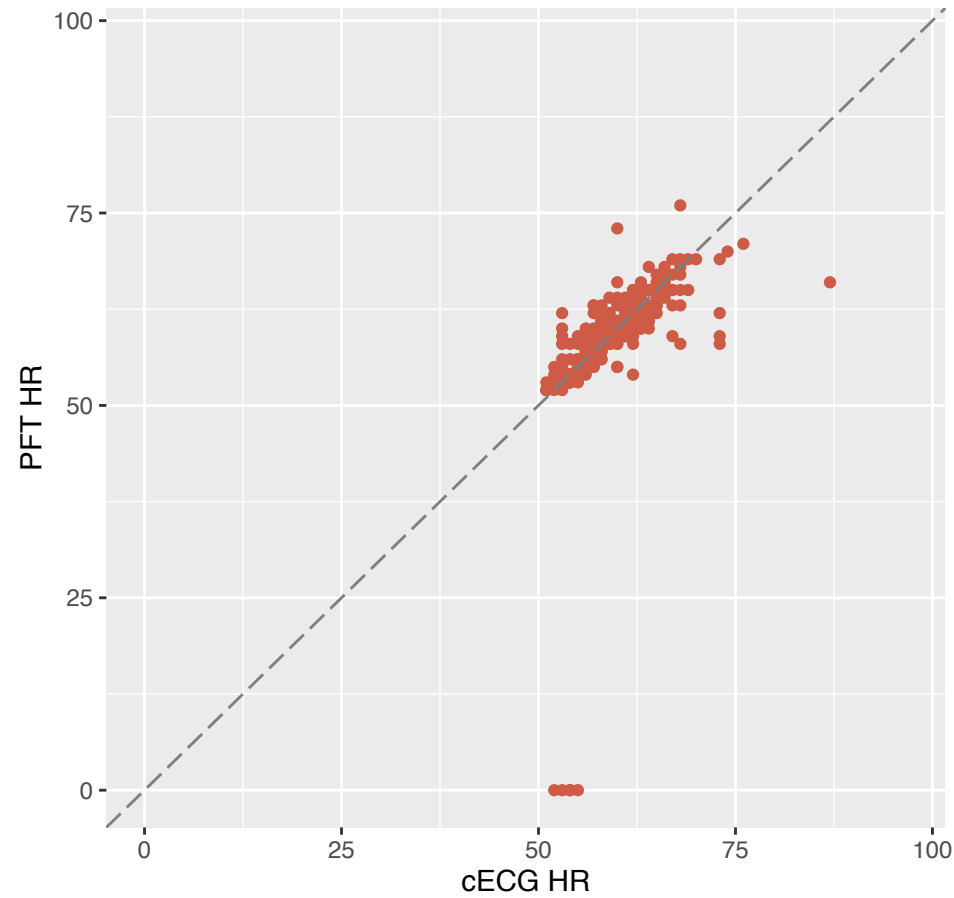

W017

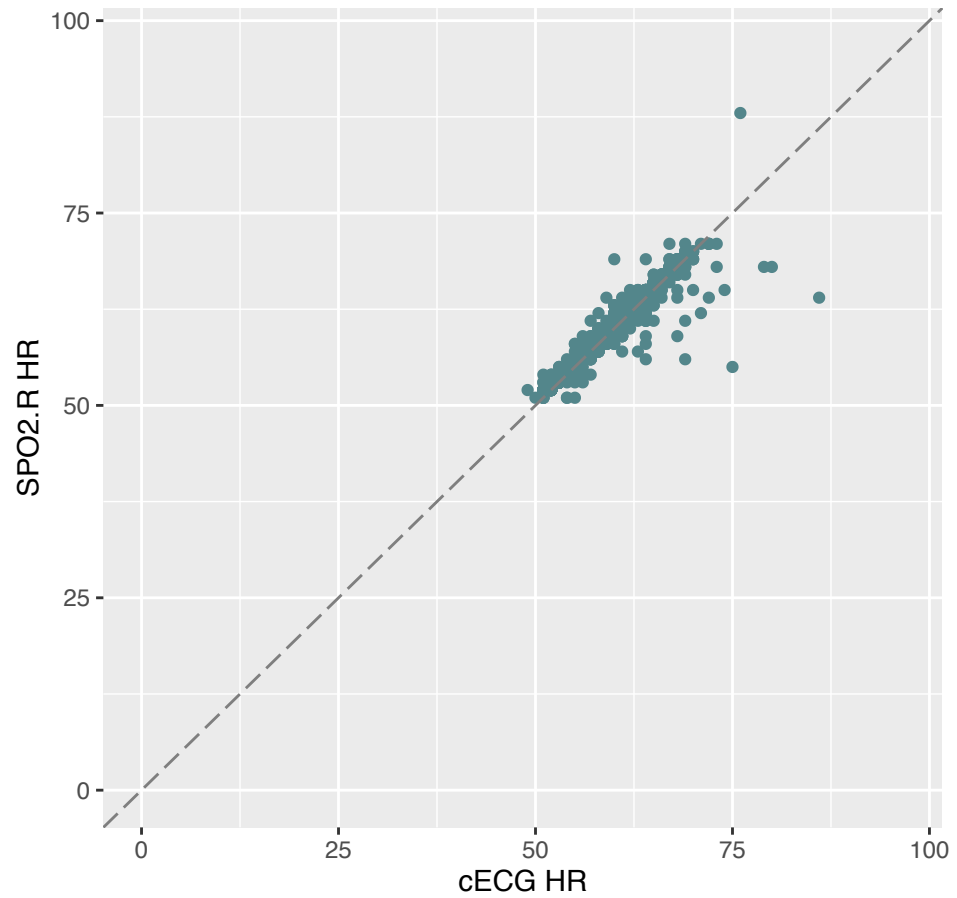

W018

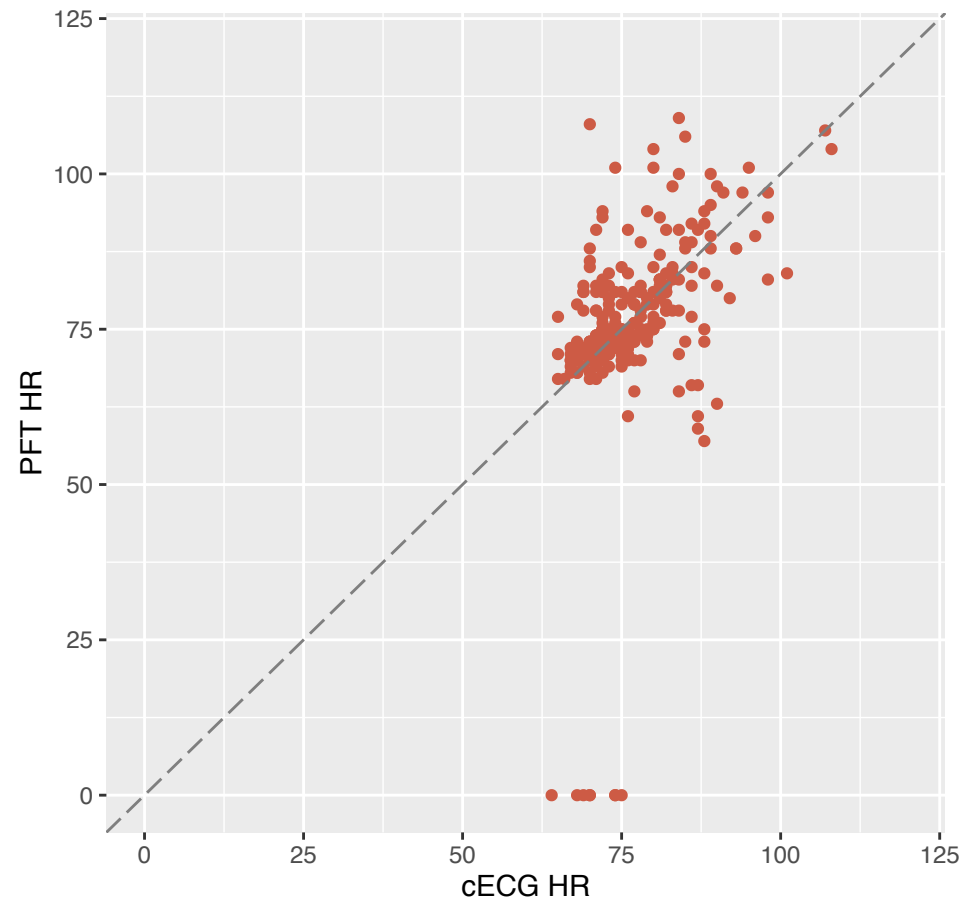

W018

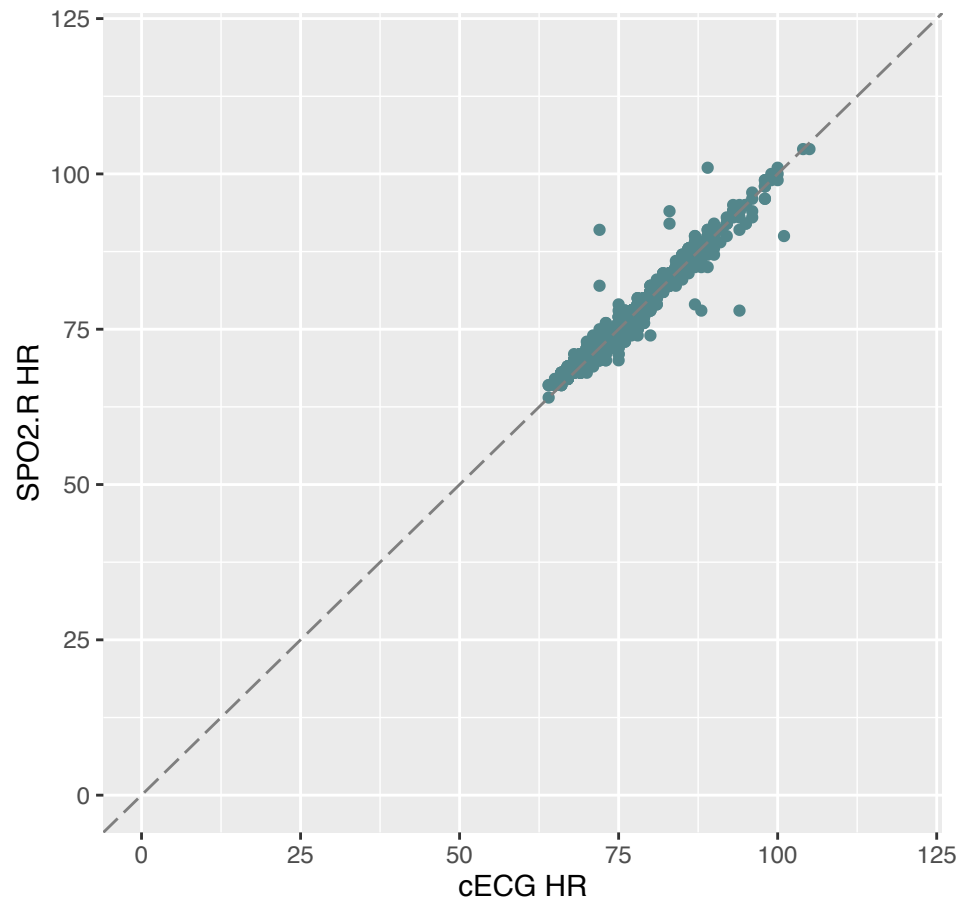



W019

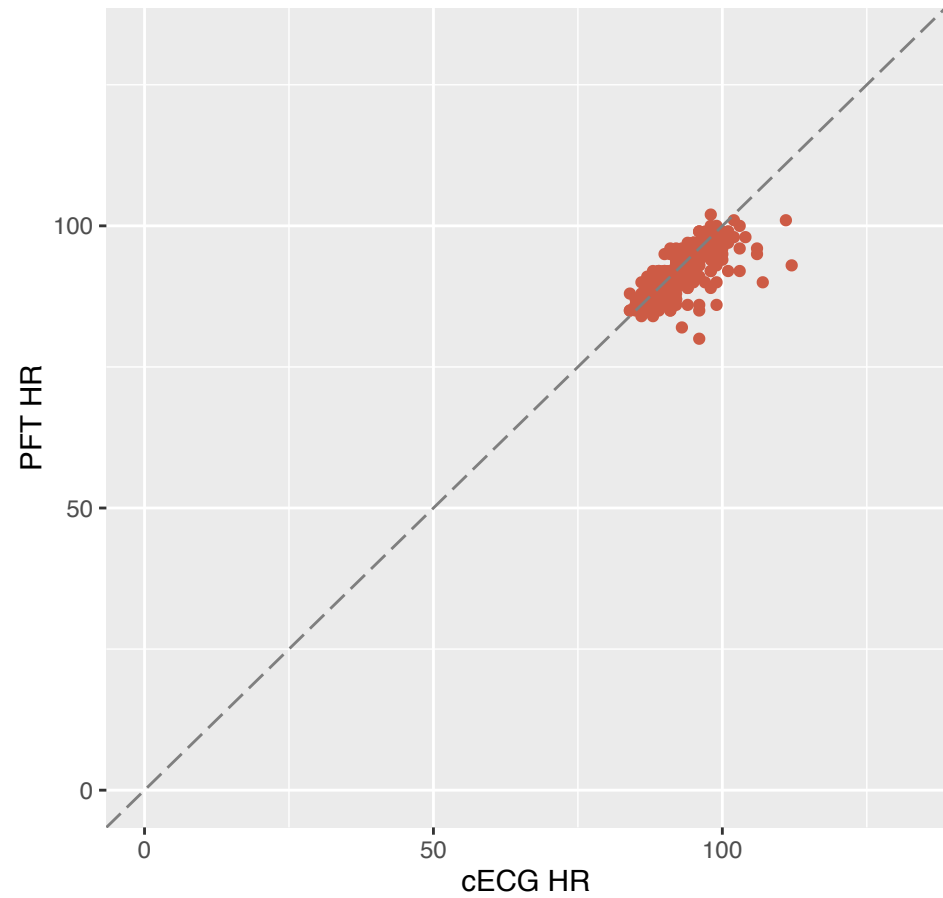

W019

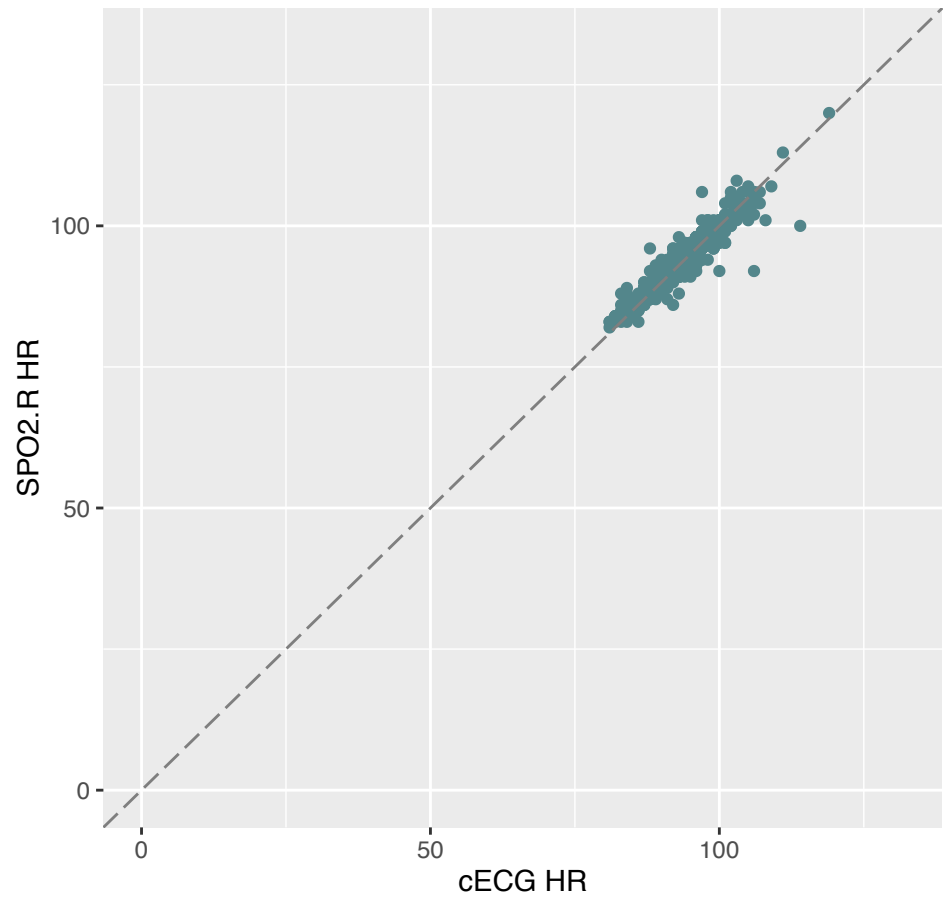

W020

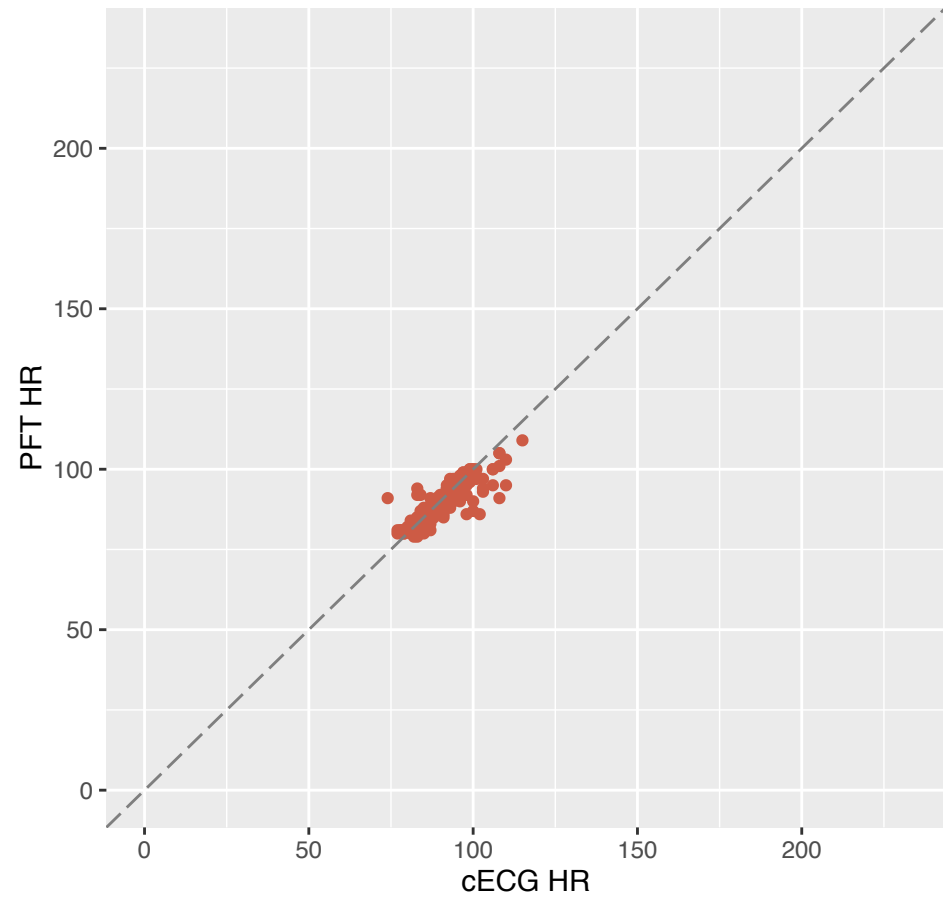

W020

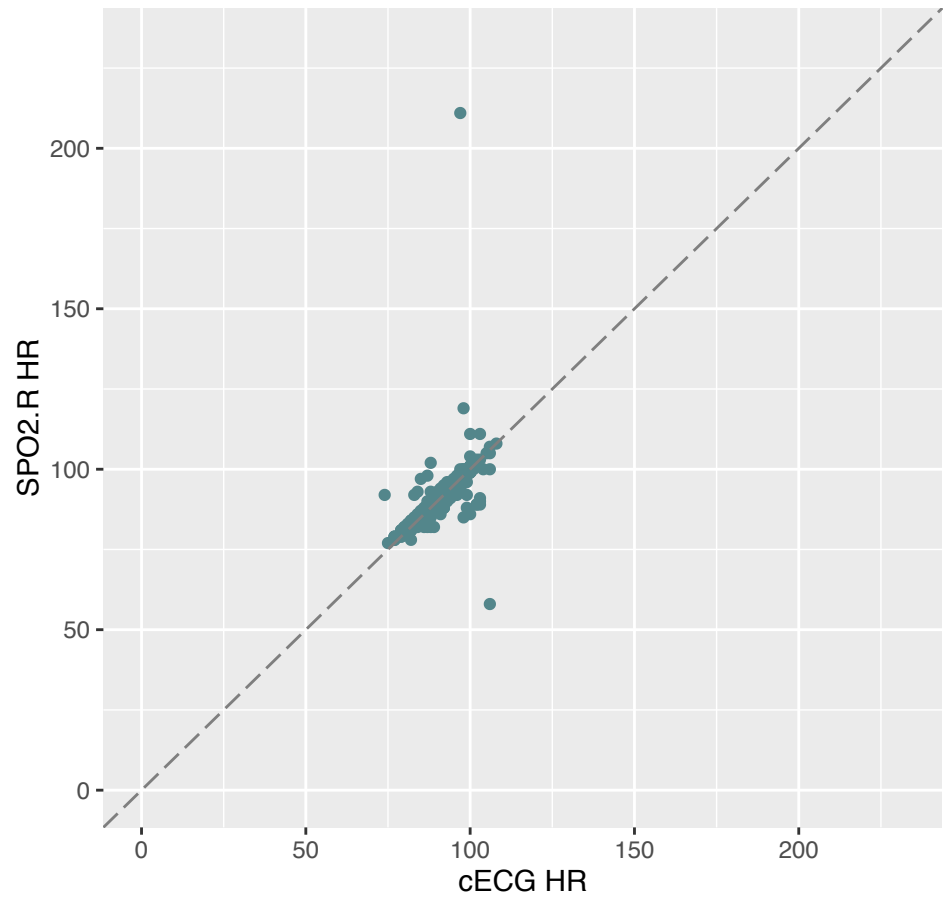

W021

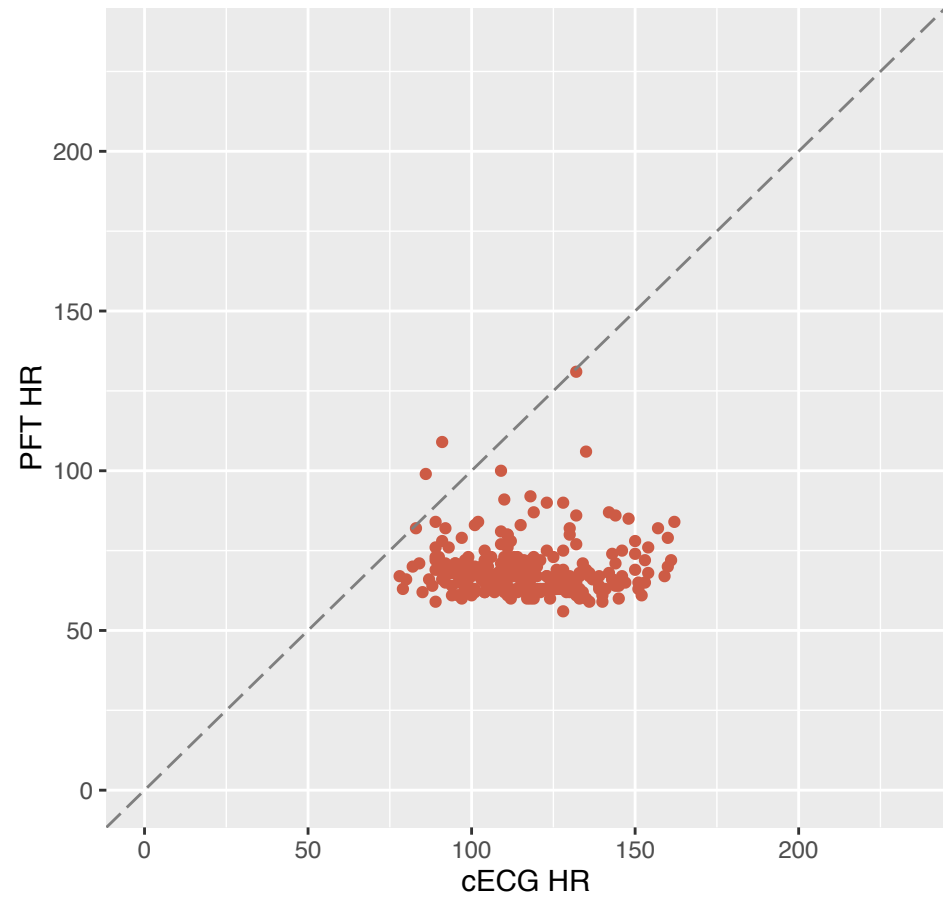

W021

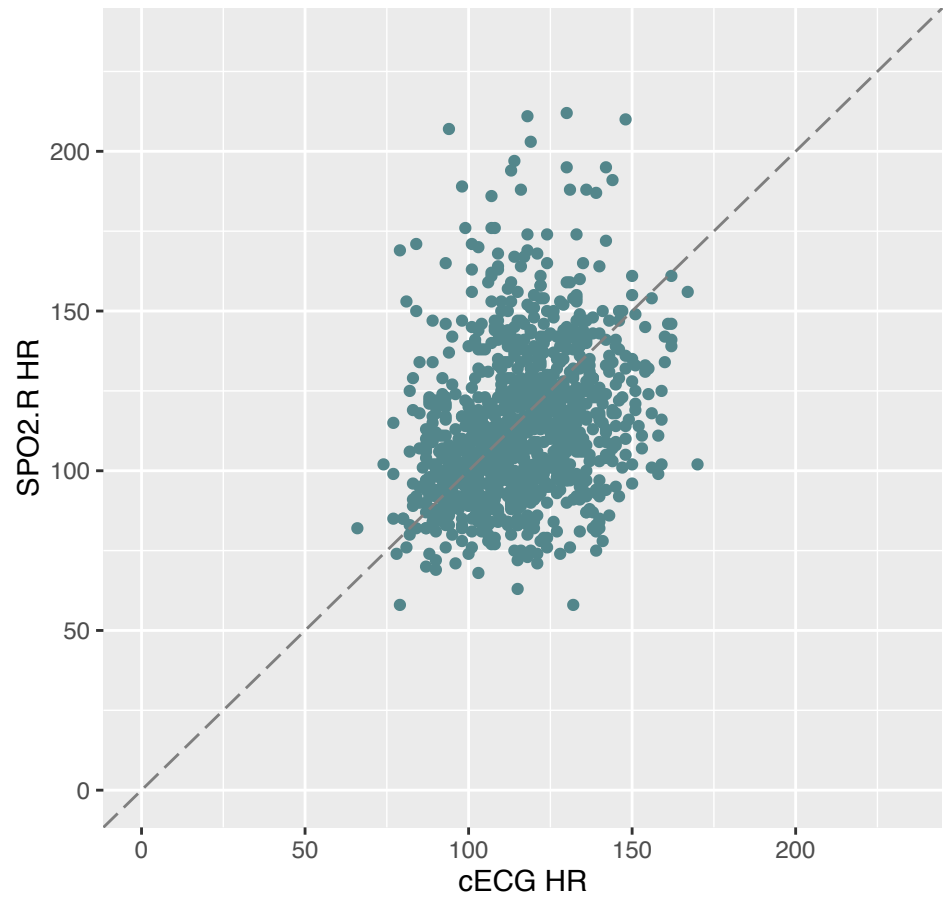

W022

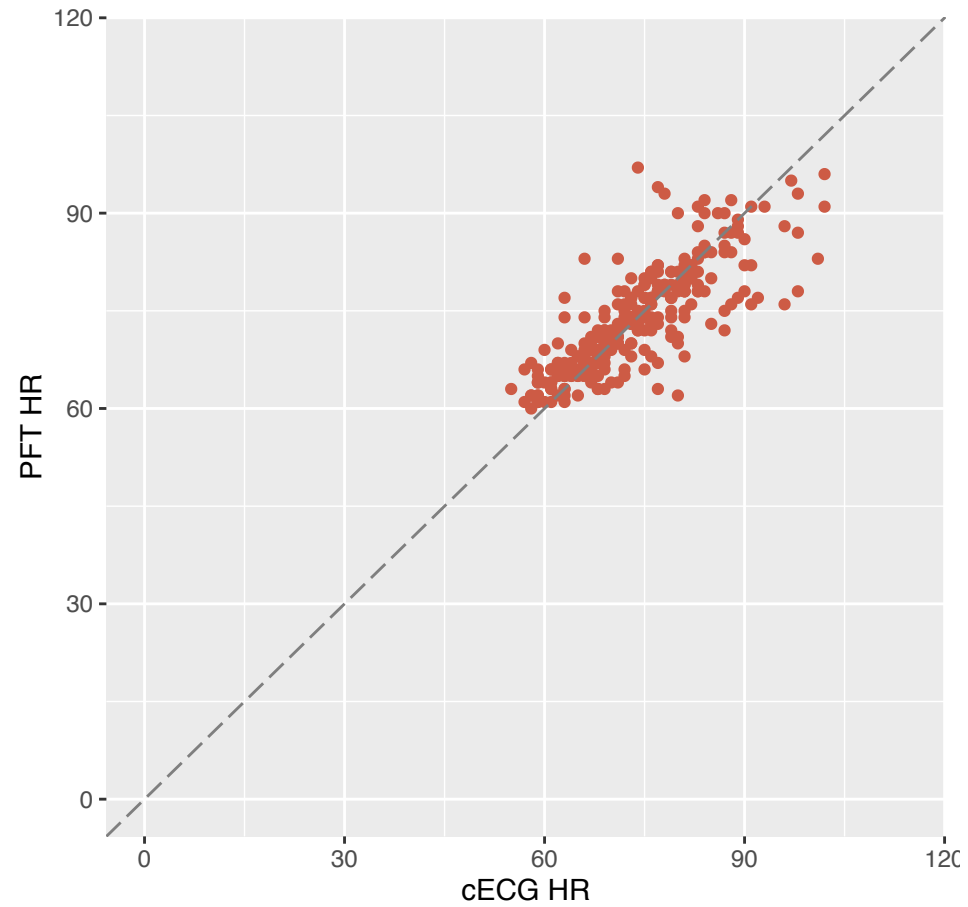

W022

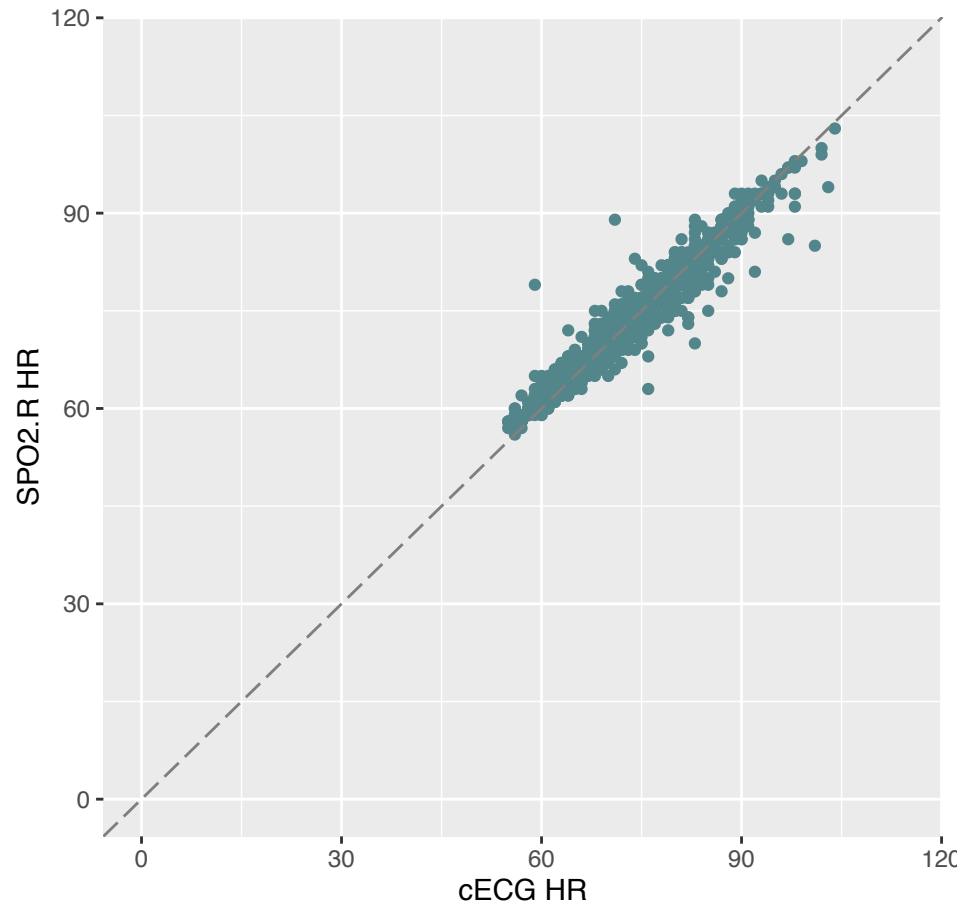

W023

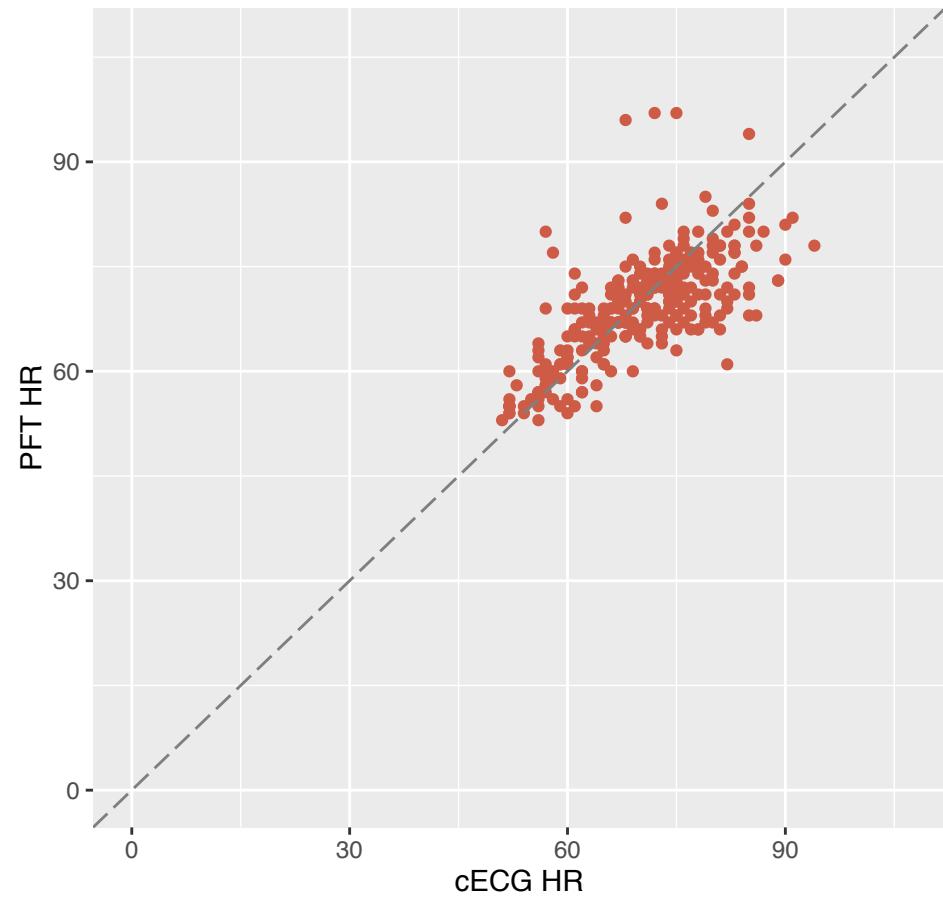

W023

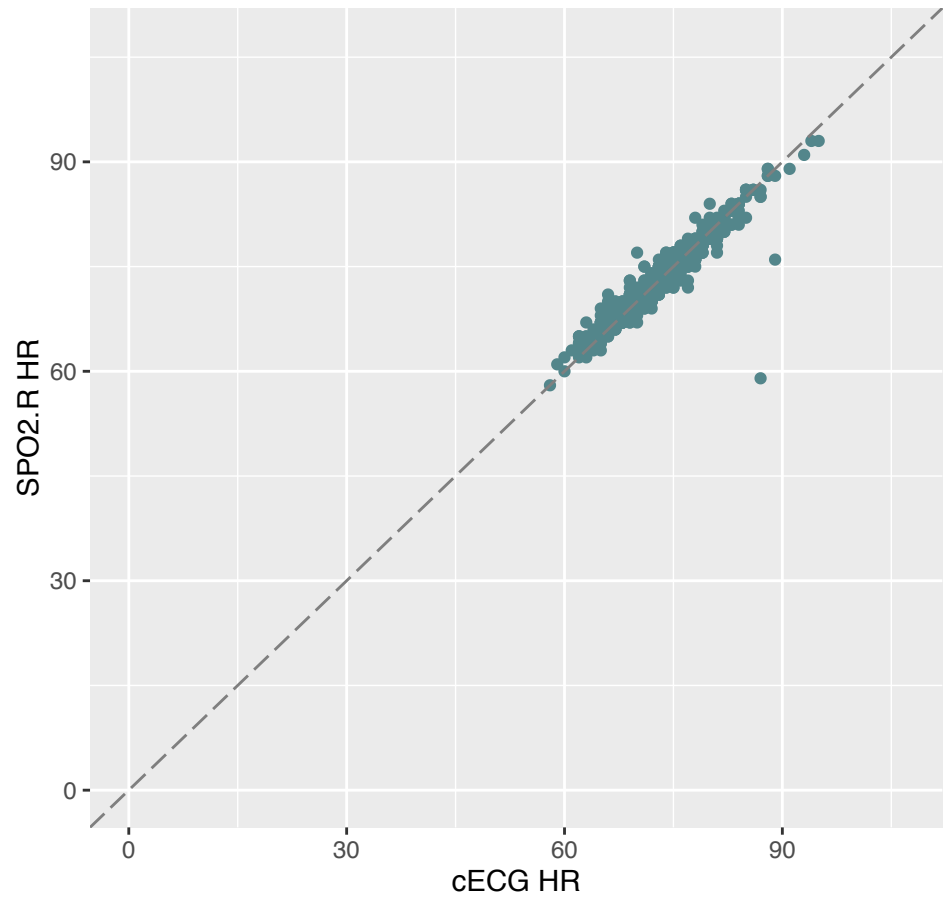

W024

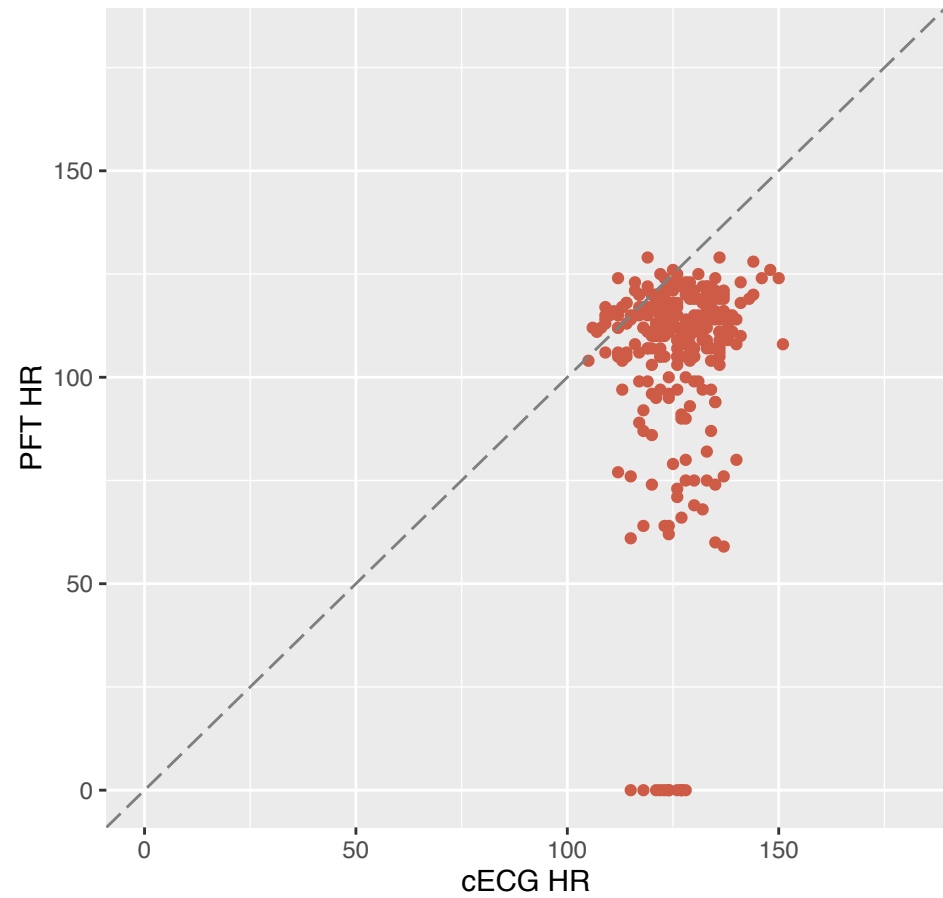

W024

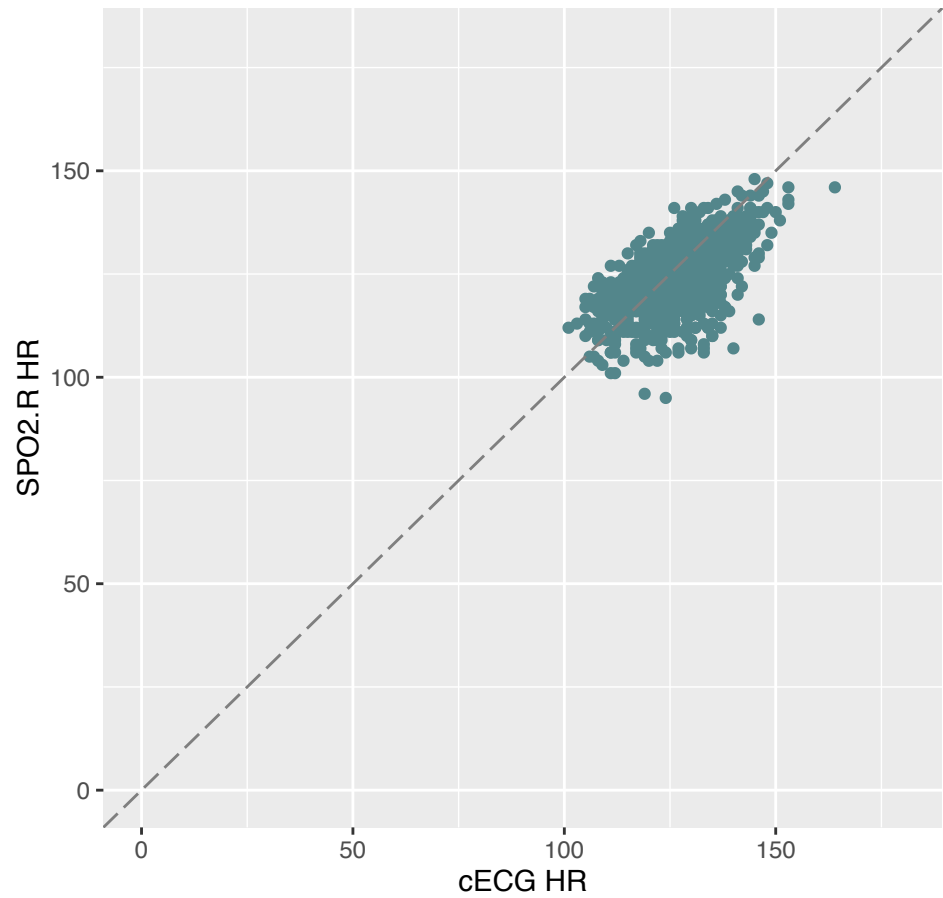

W025

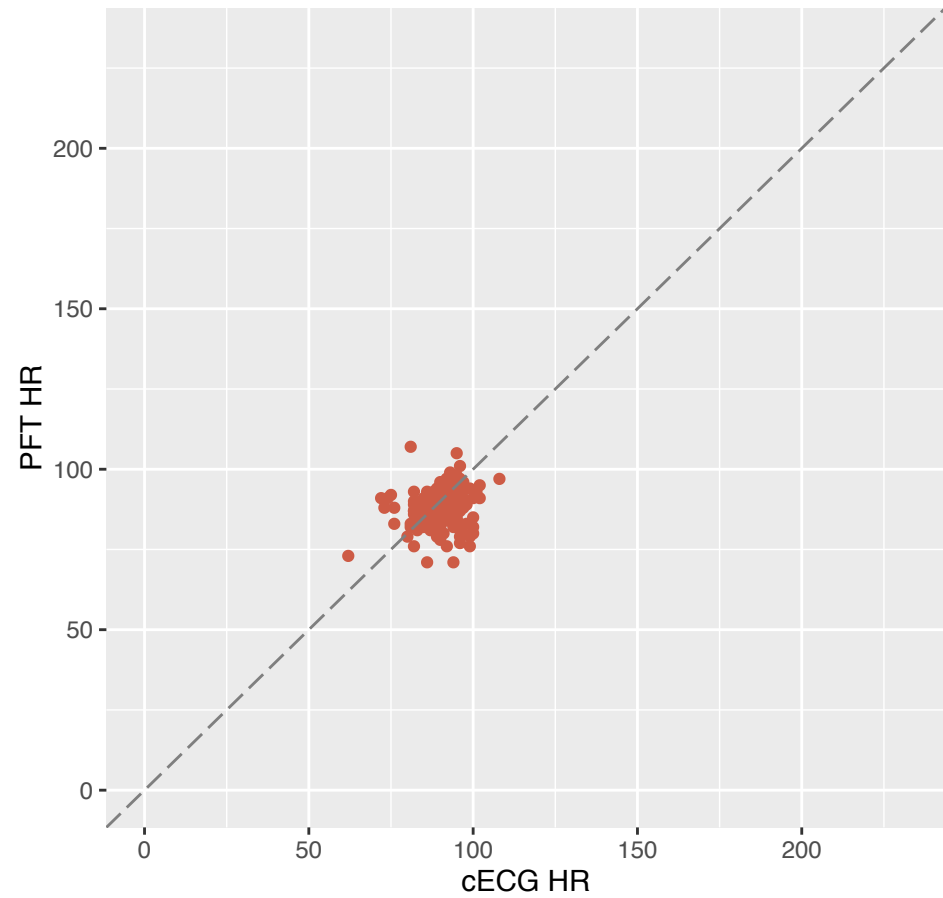

W025

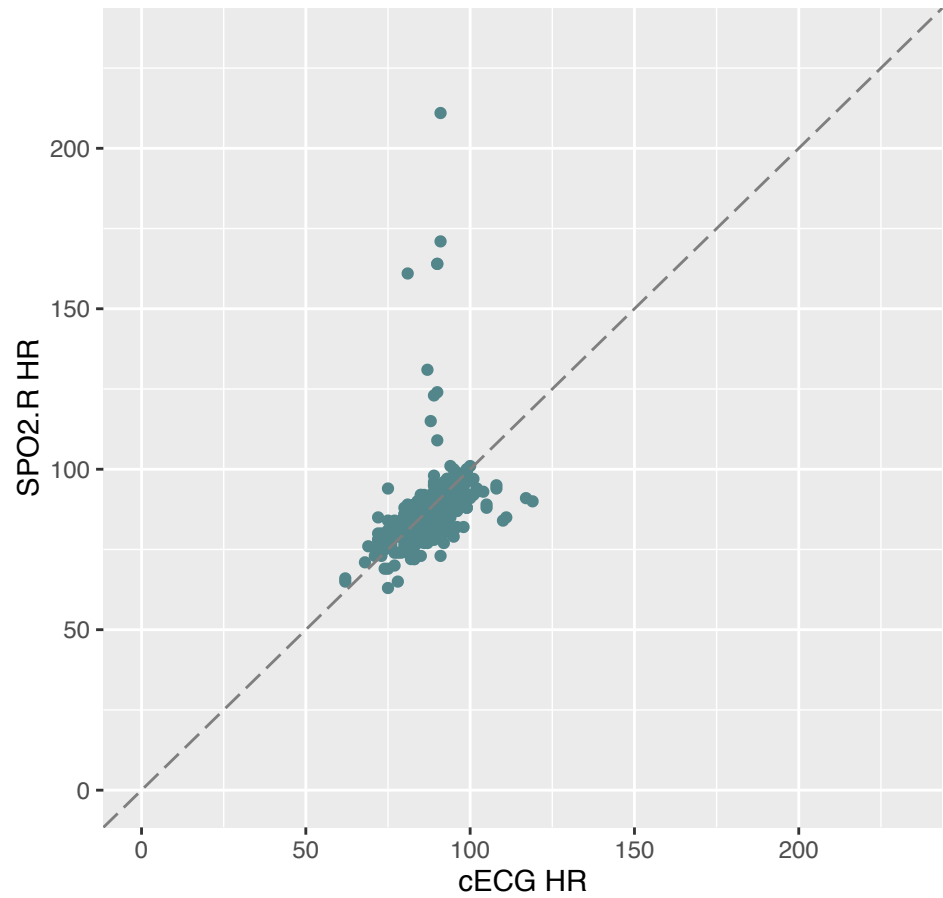

W026

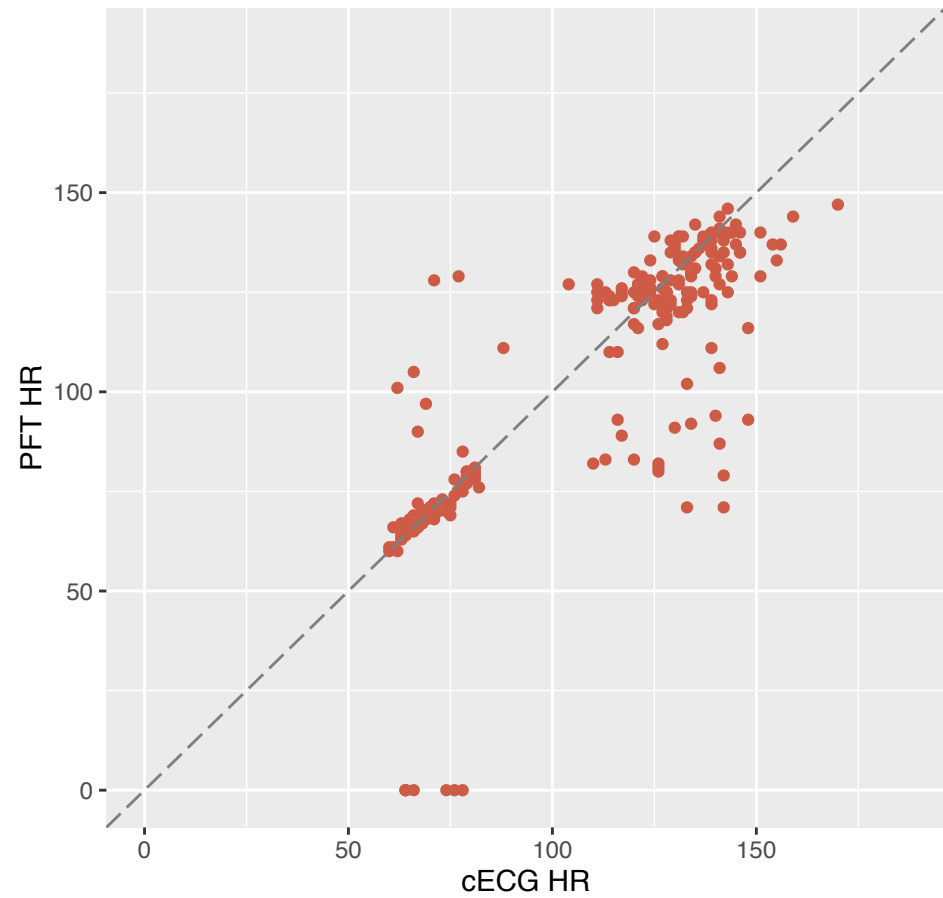

W026

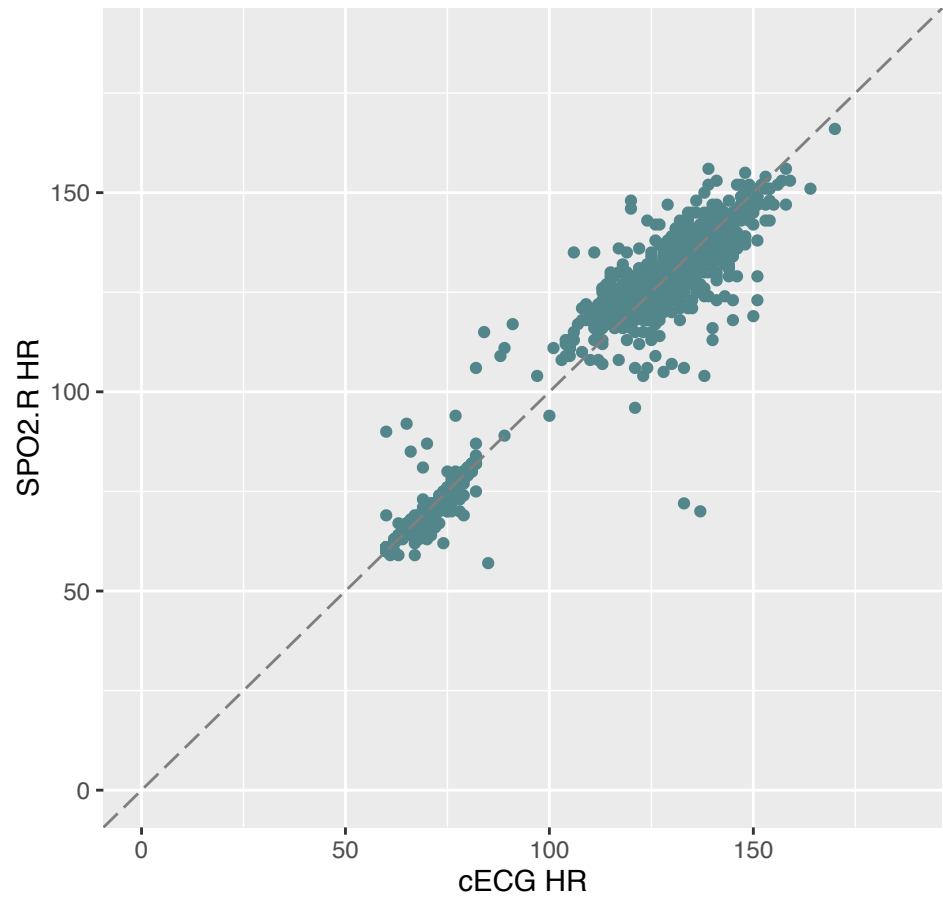



W027

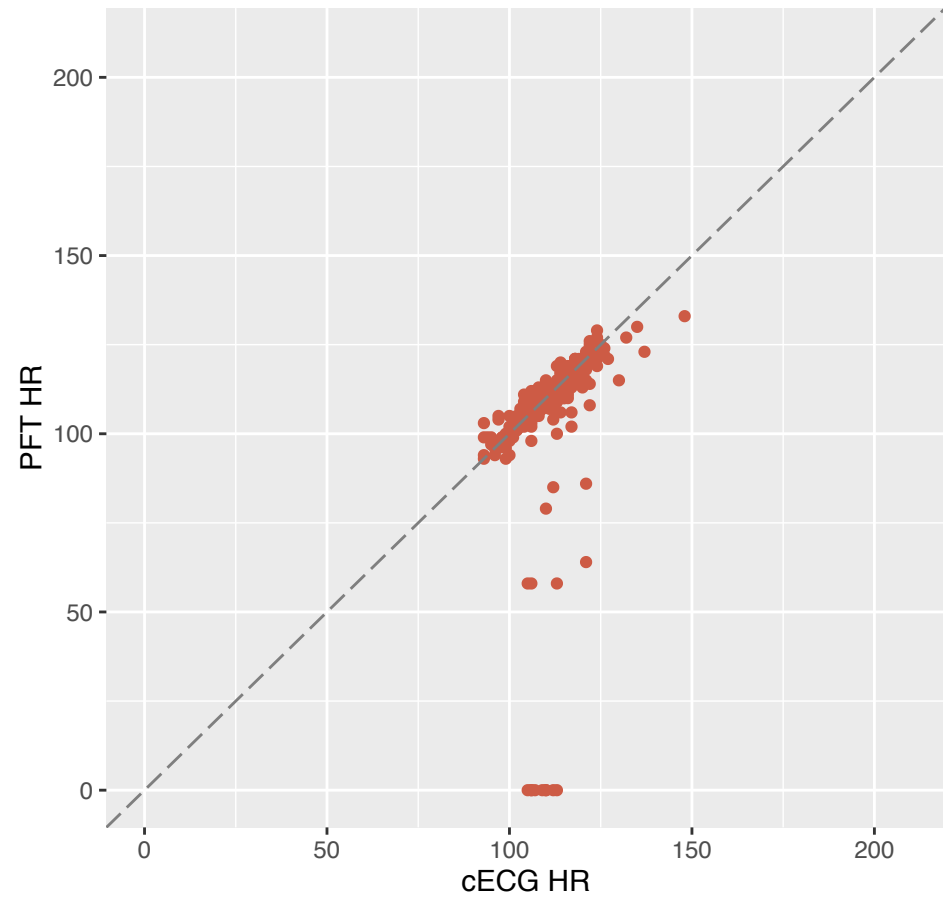

W027

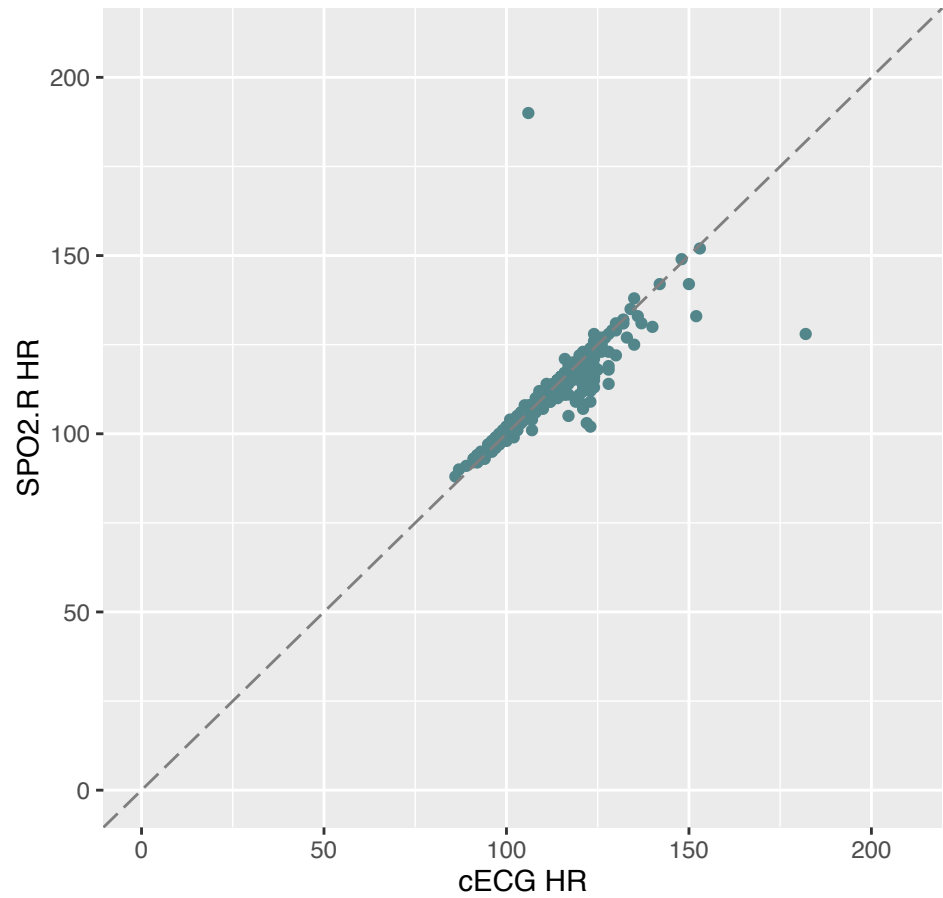

W028

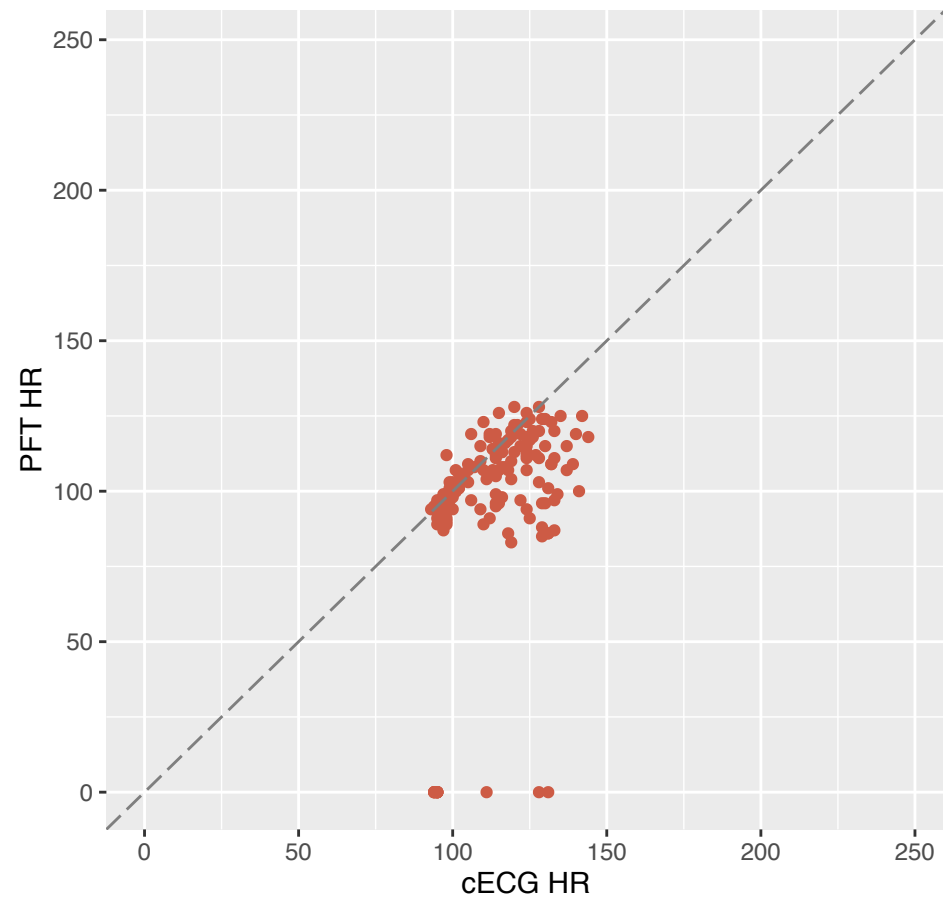

W028

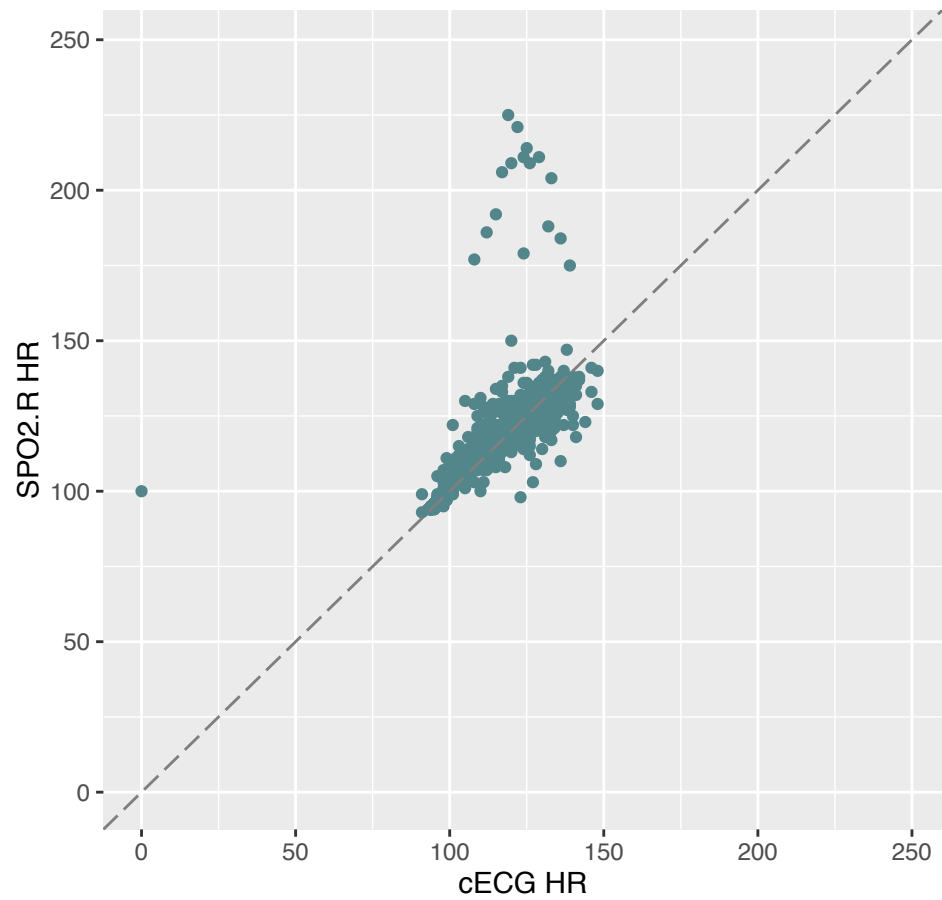

W029

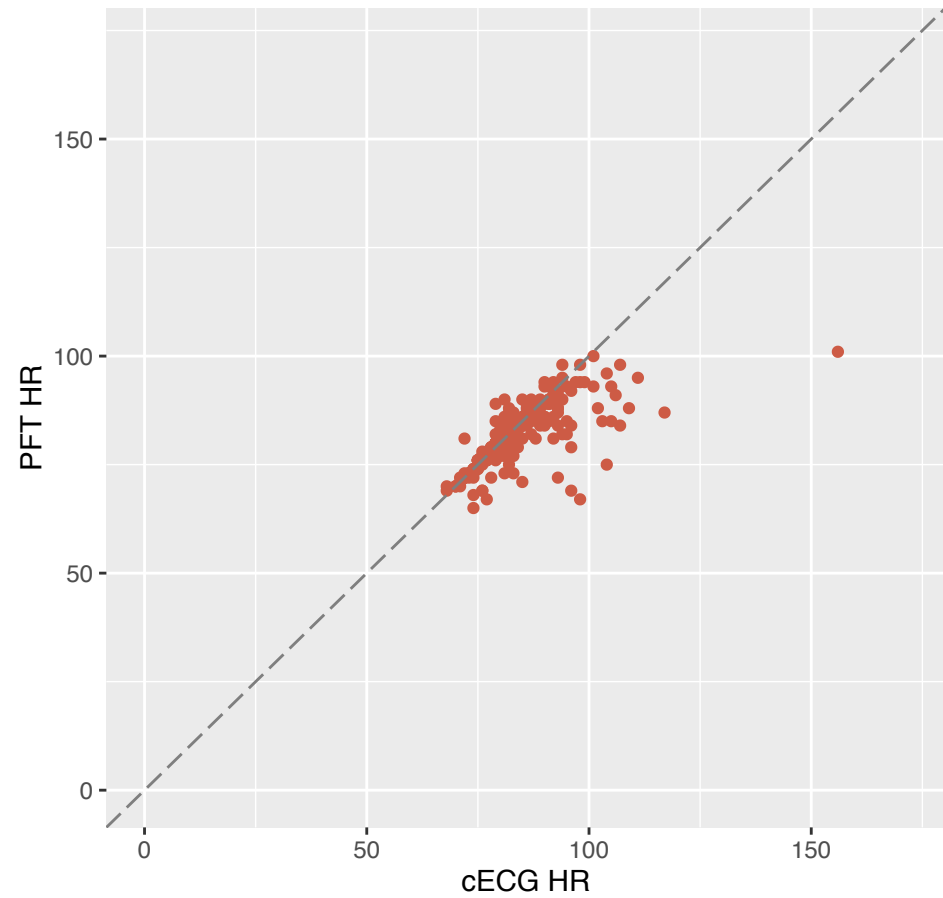

W029

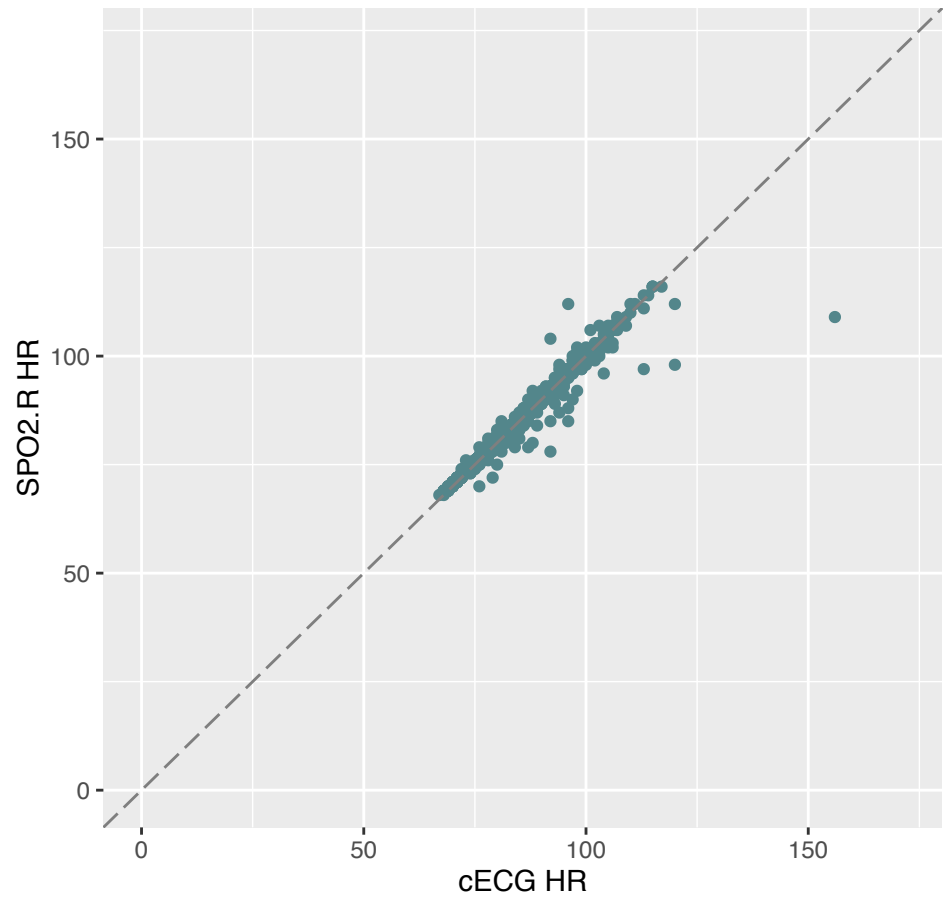

W030

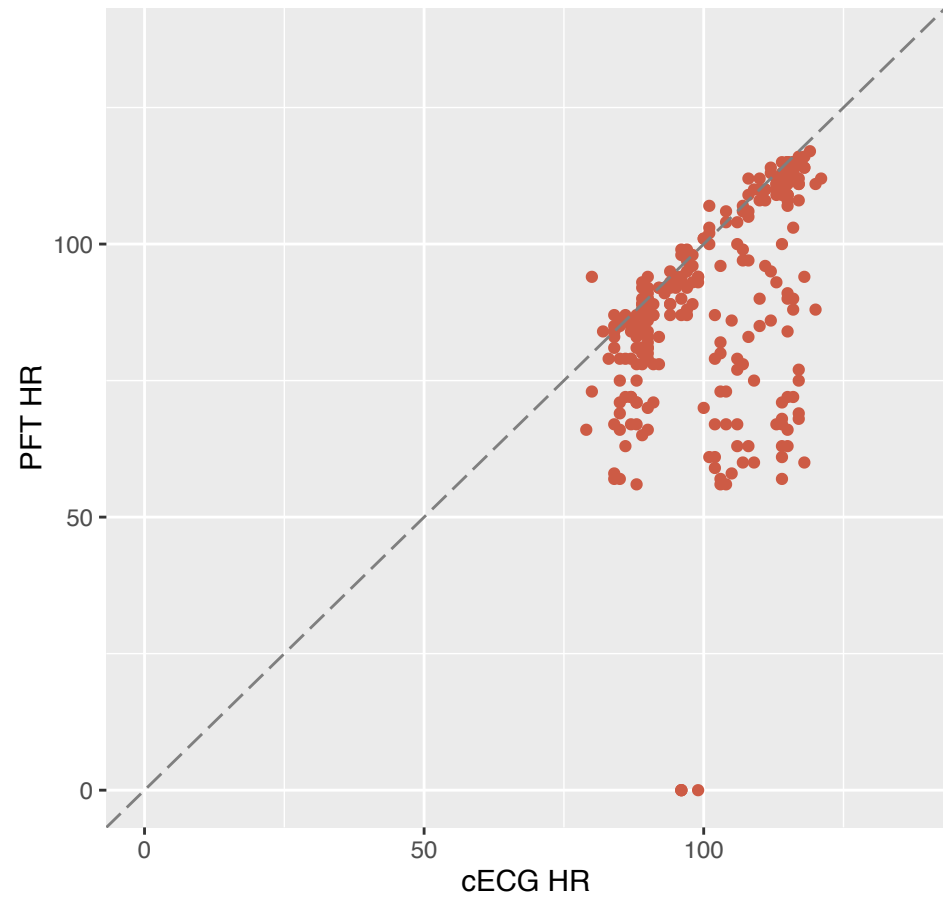

W030

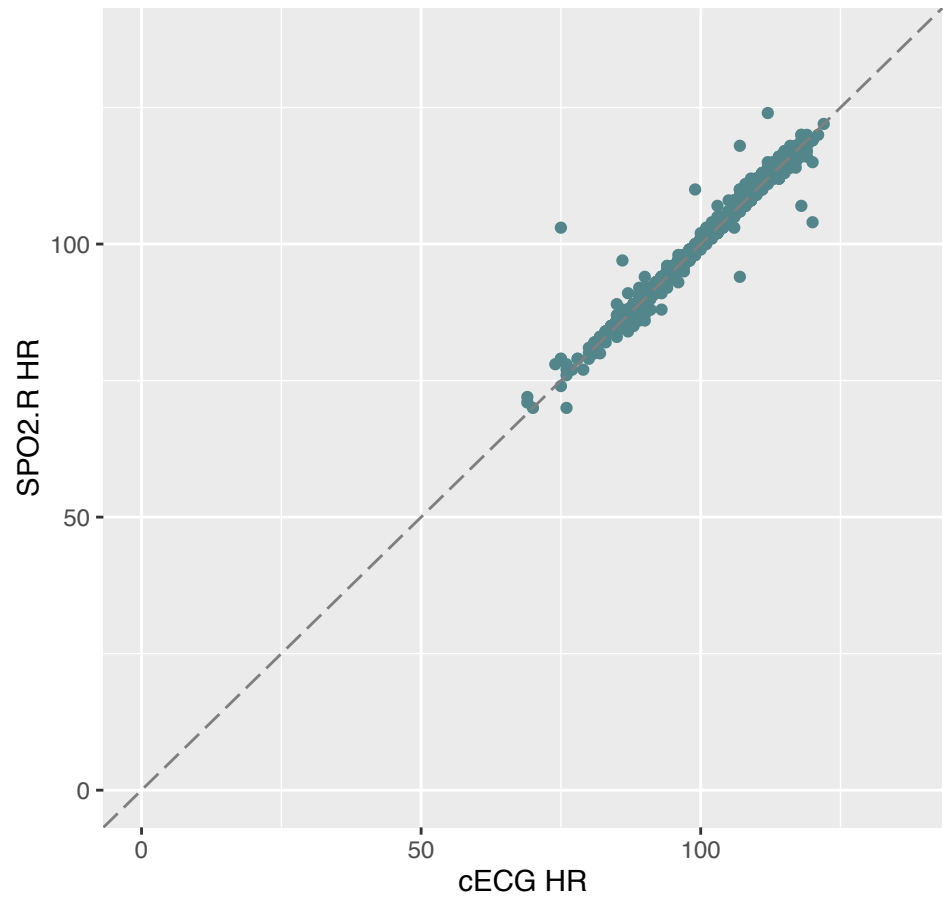

W031

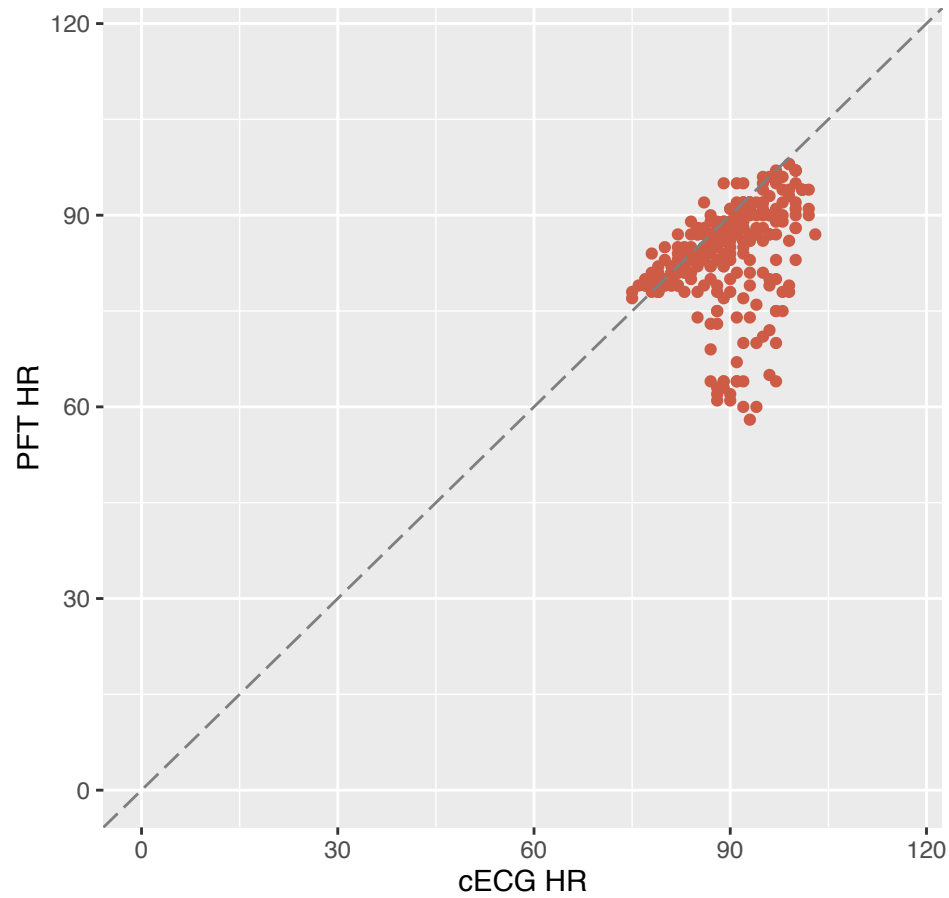

W031

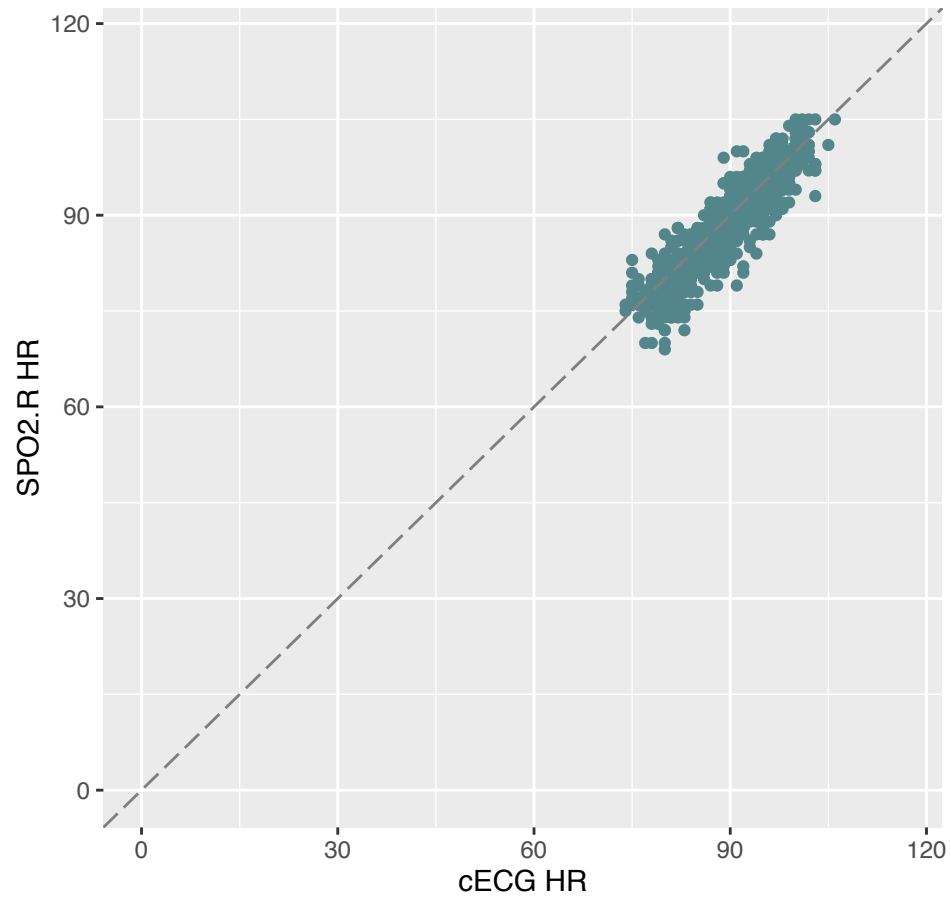

W032

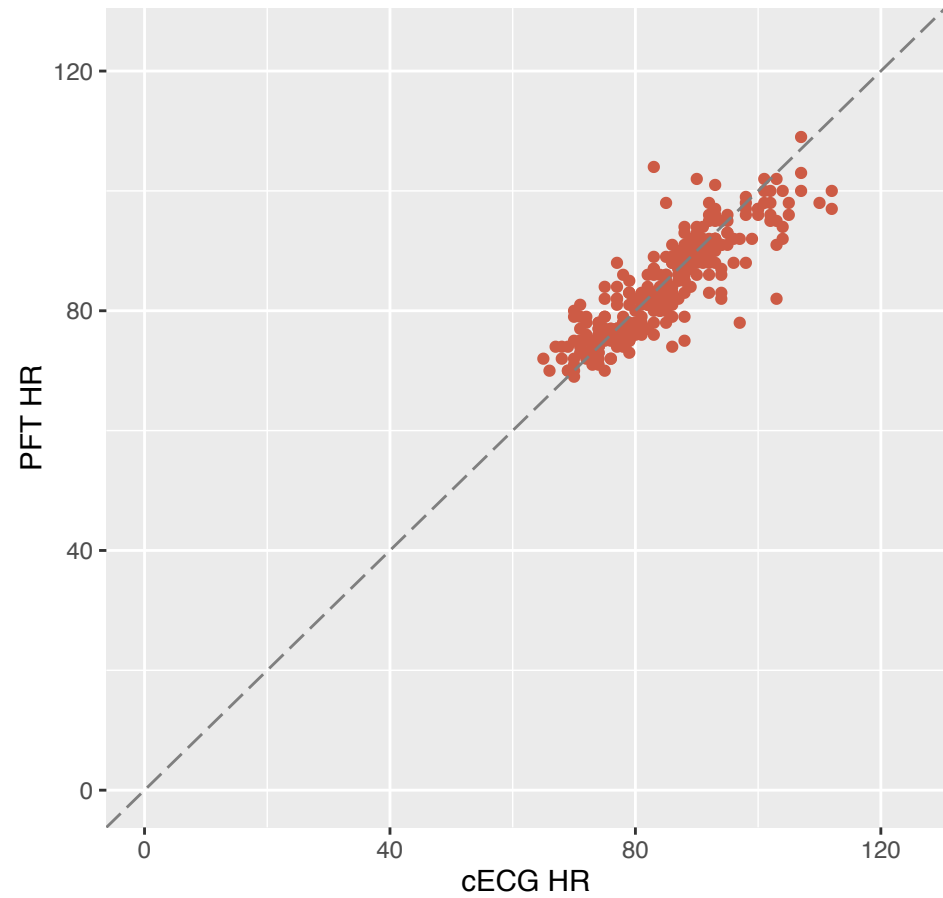

W032

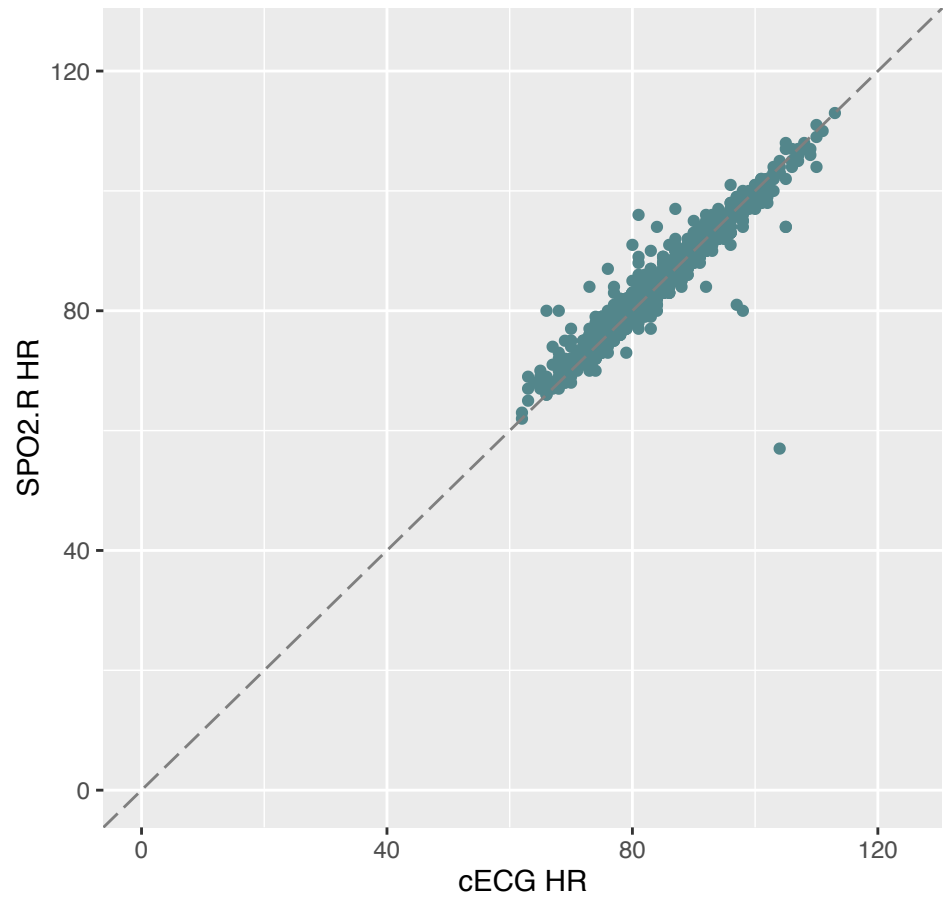

W033

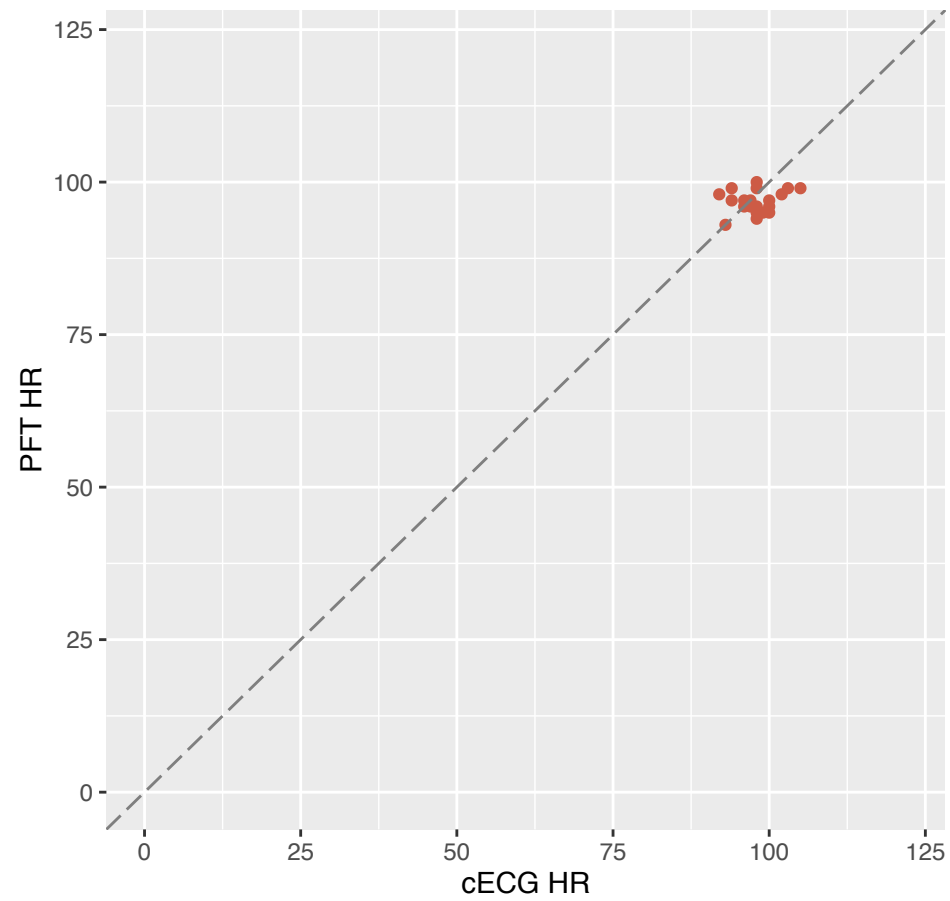

W033

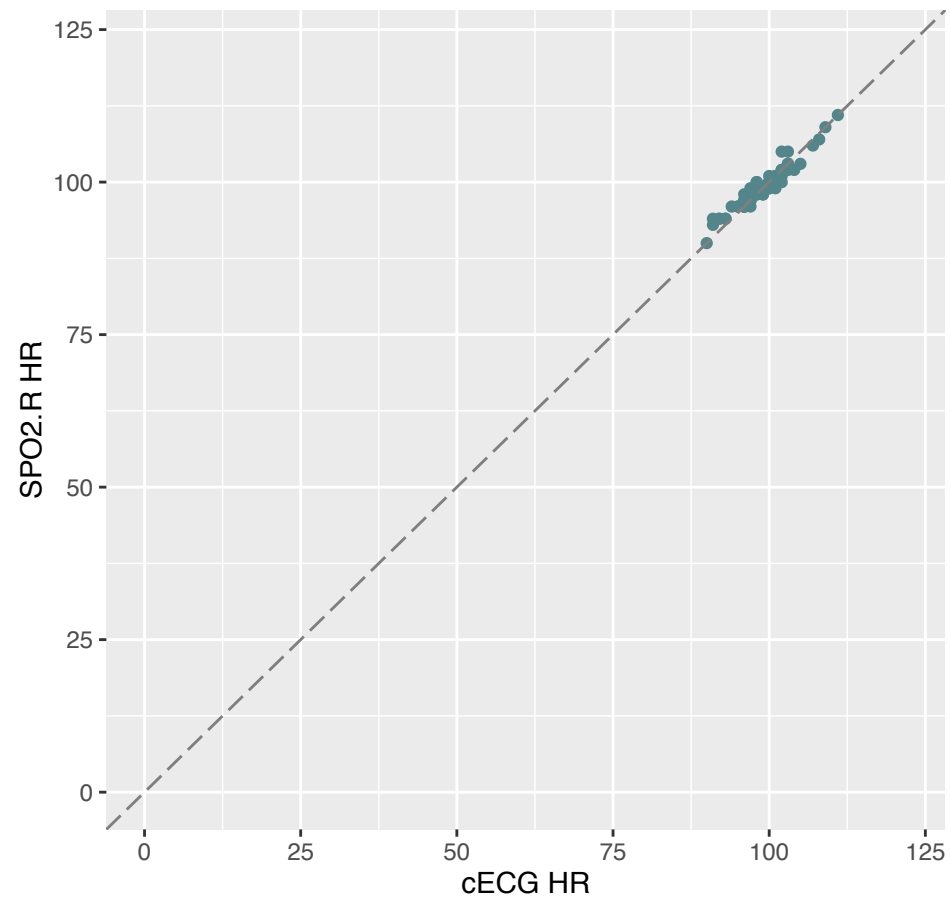

W034

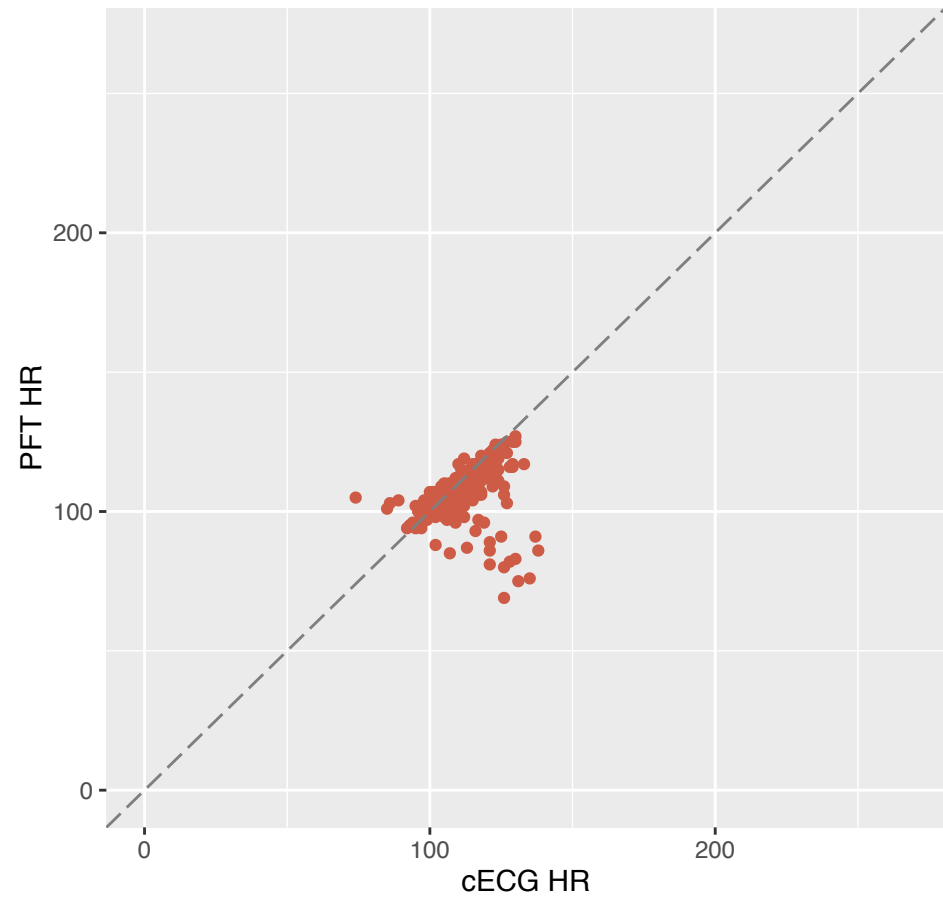

W034

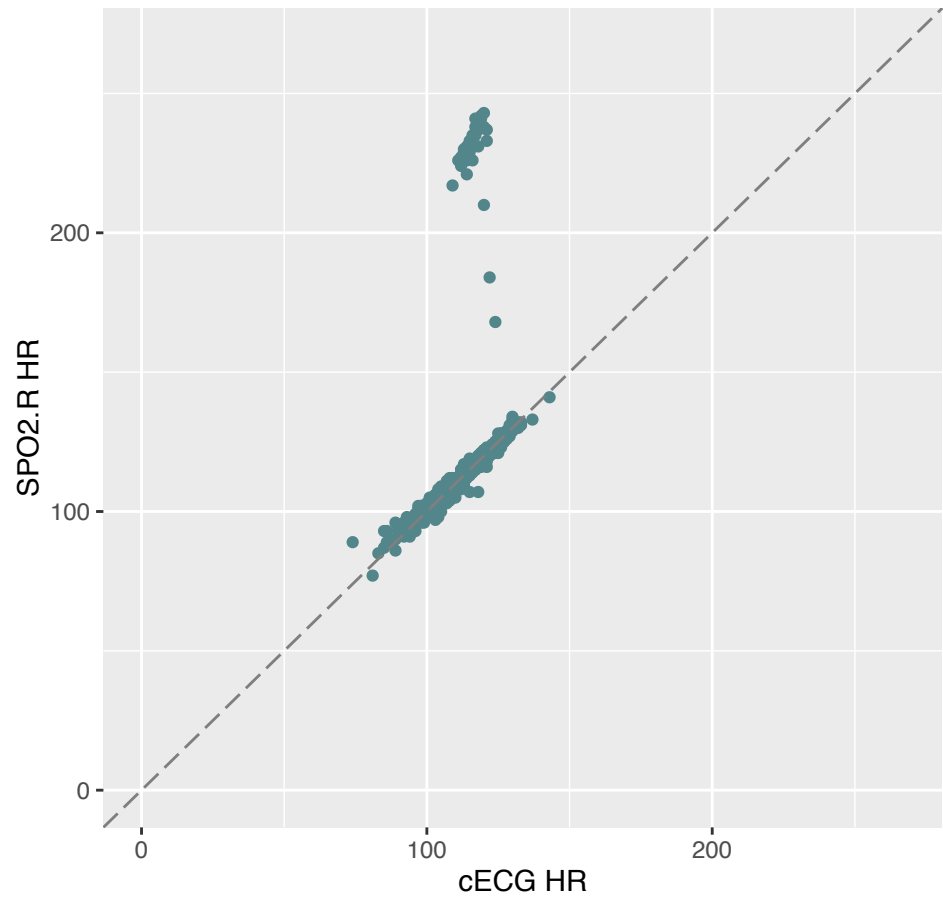



W035

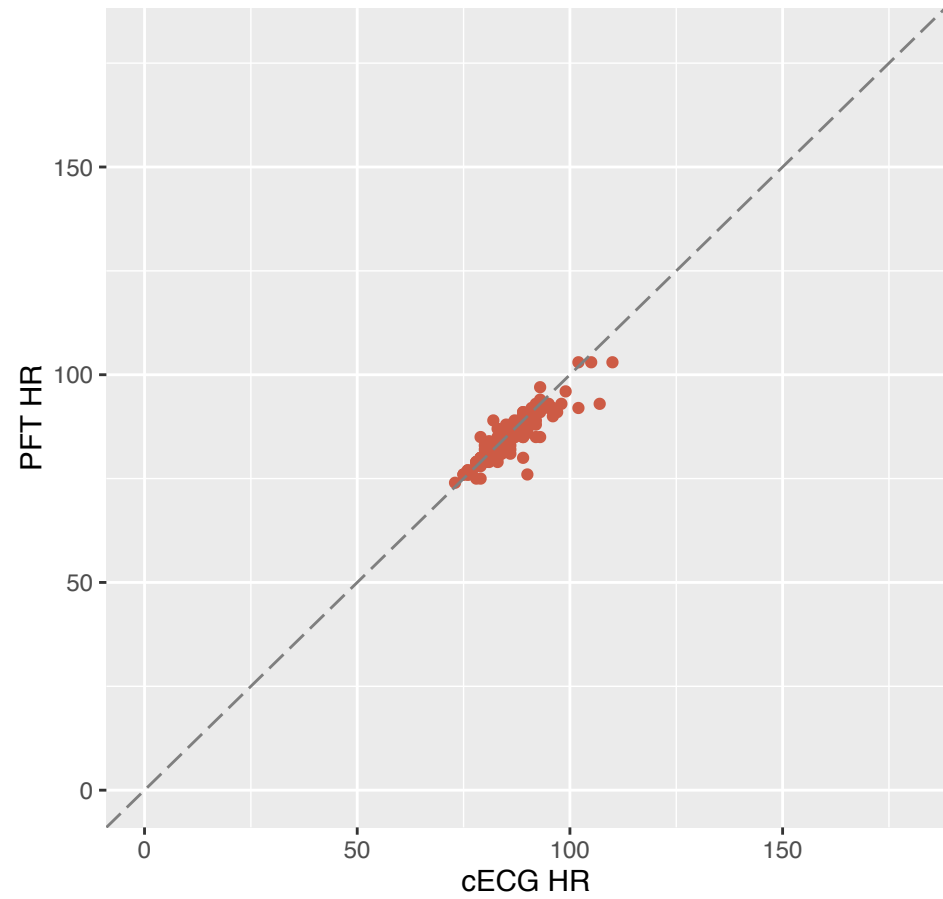

W035

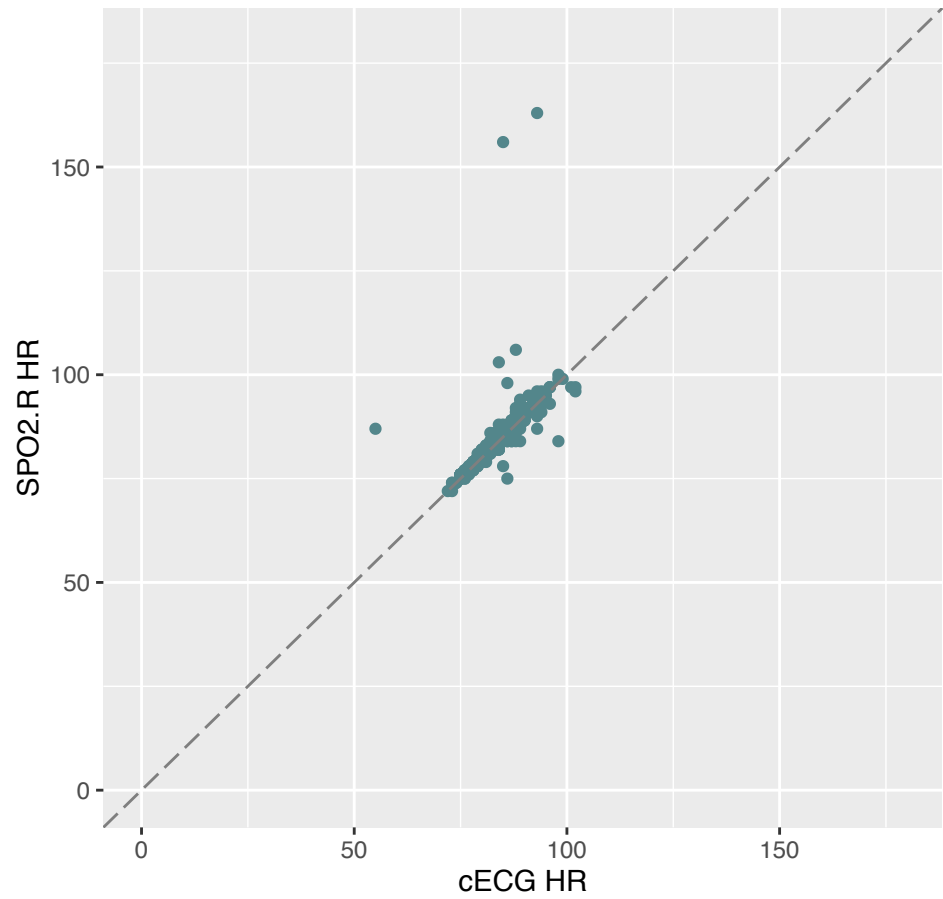

W036

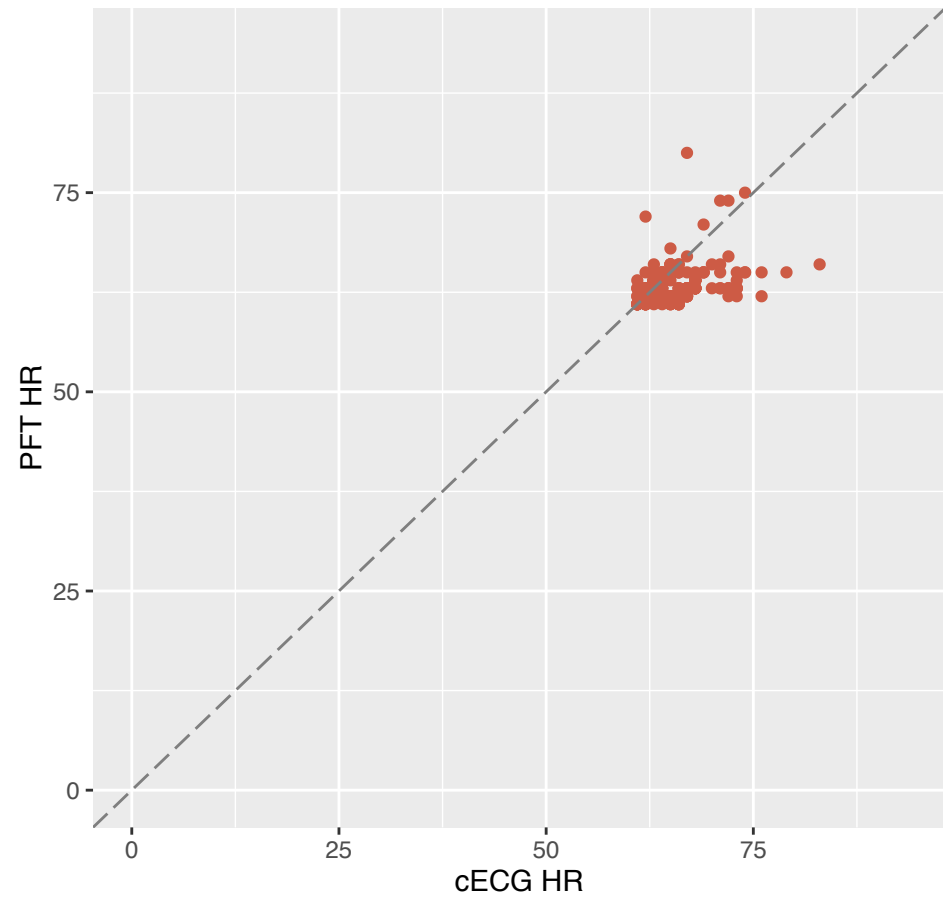

W036

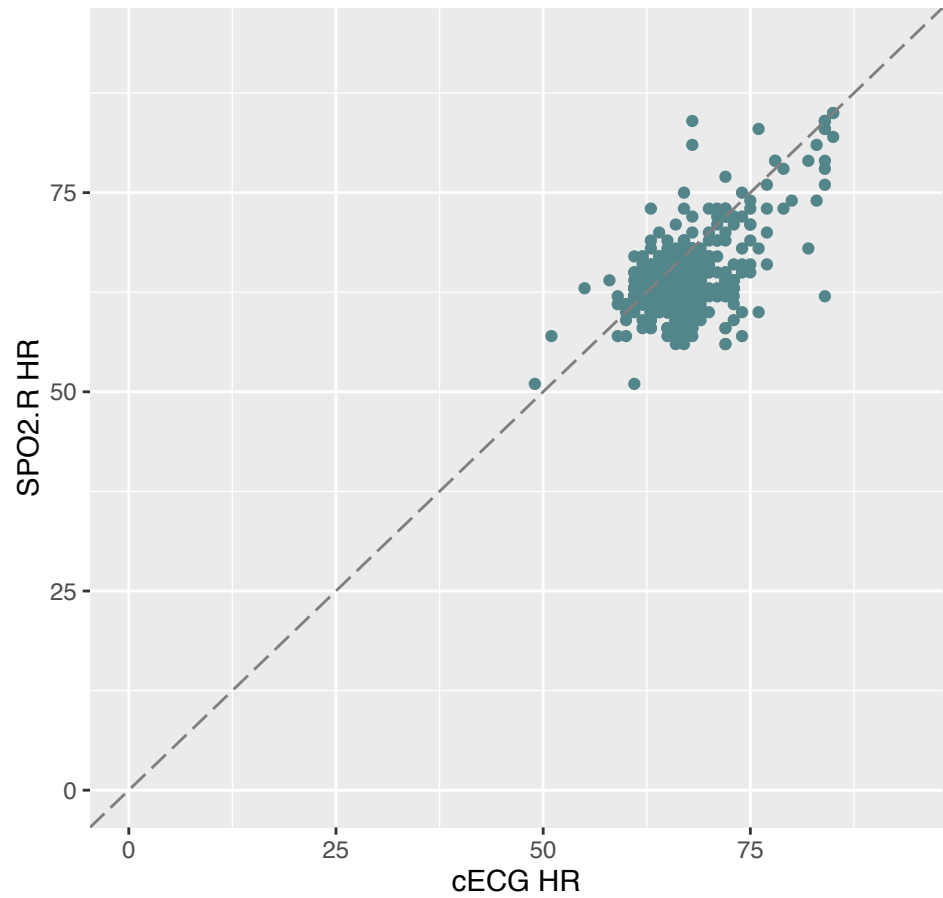

W037

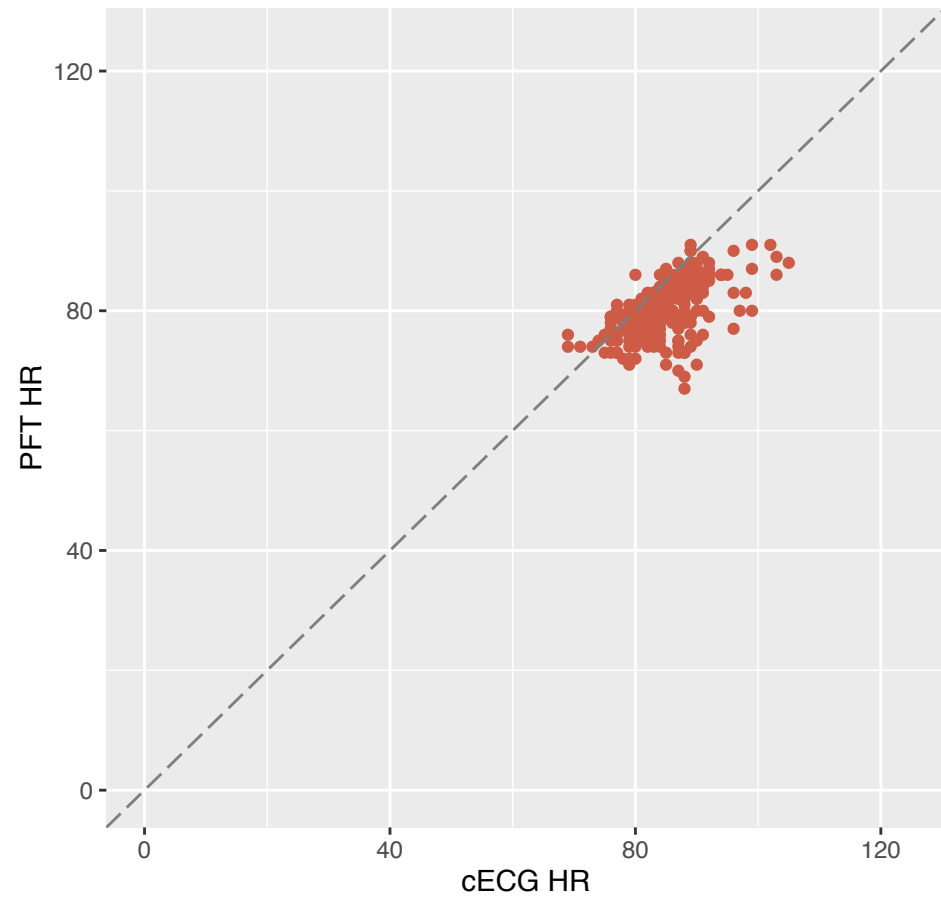

W037

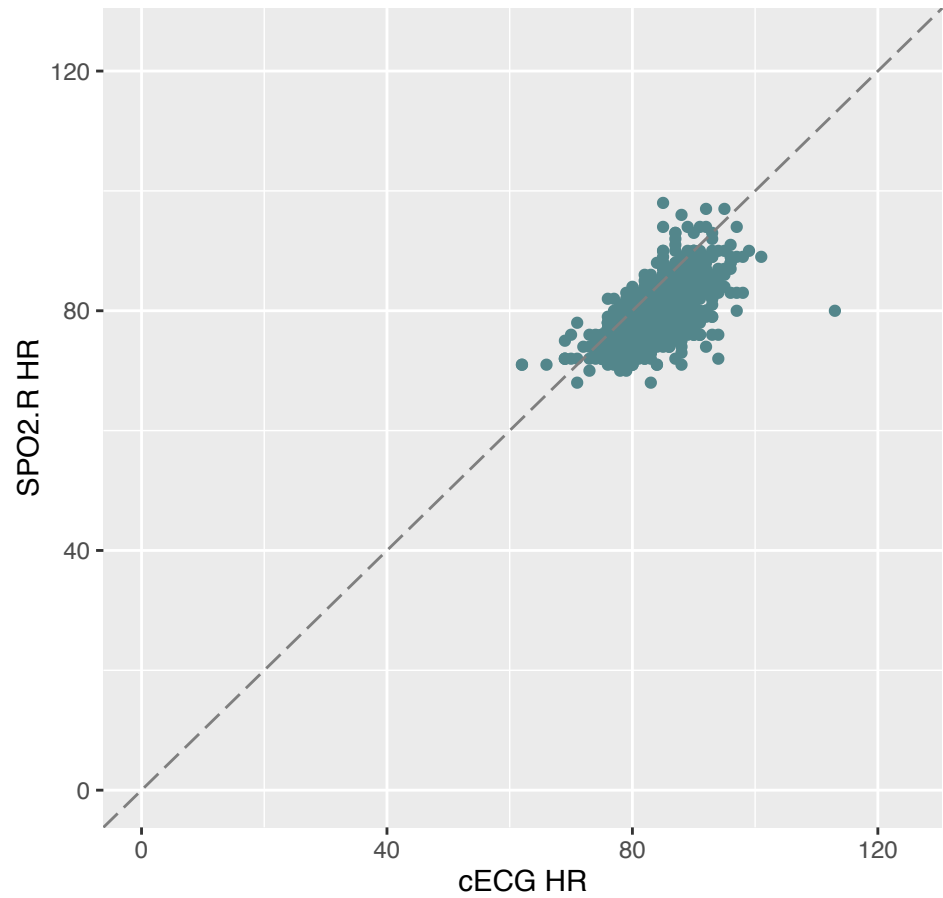

W038

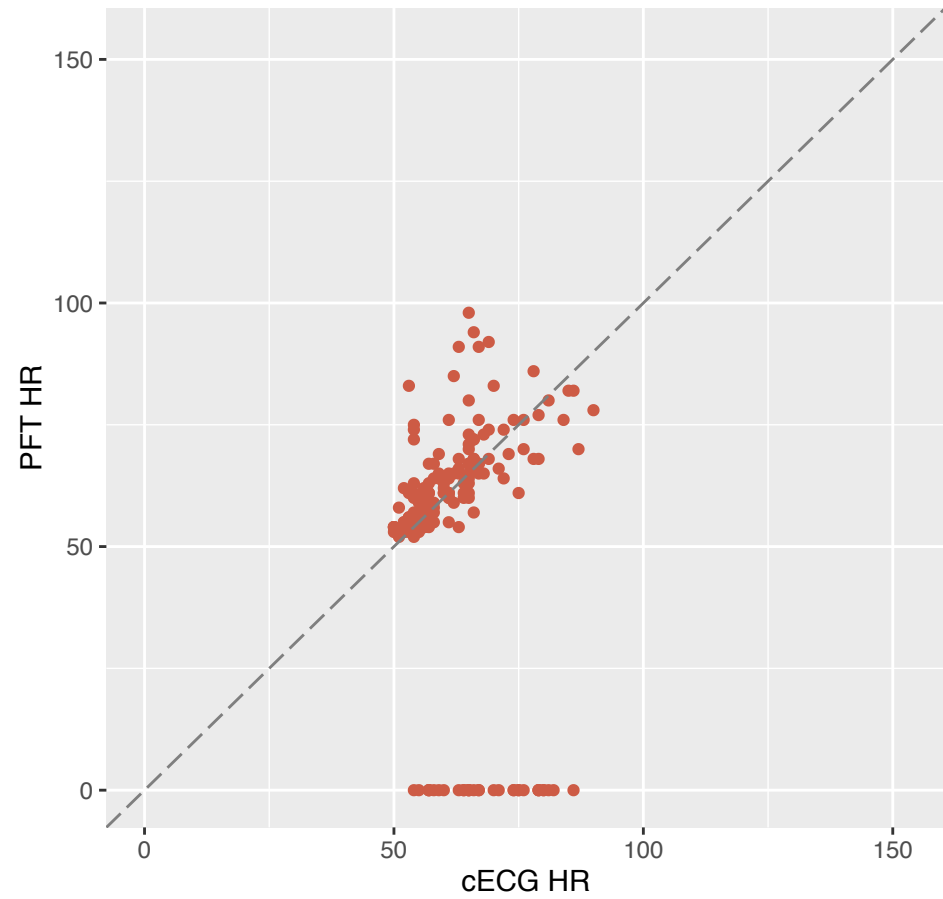

W038

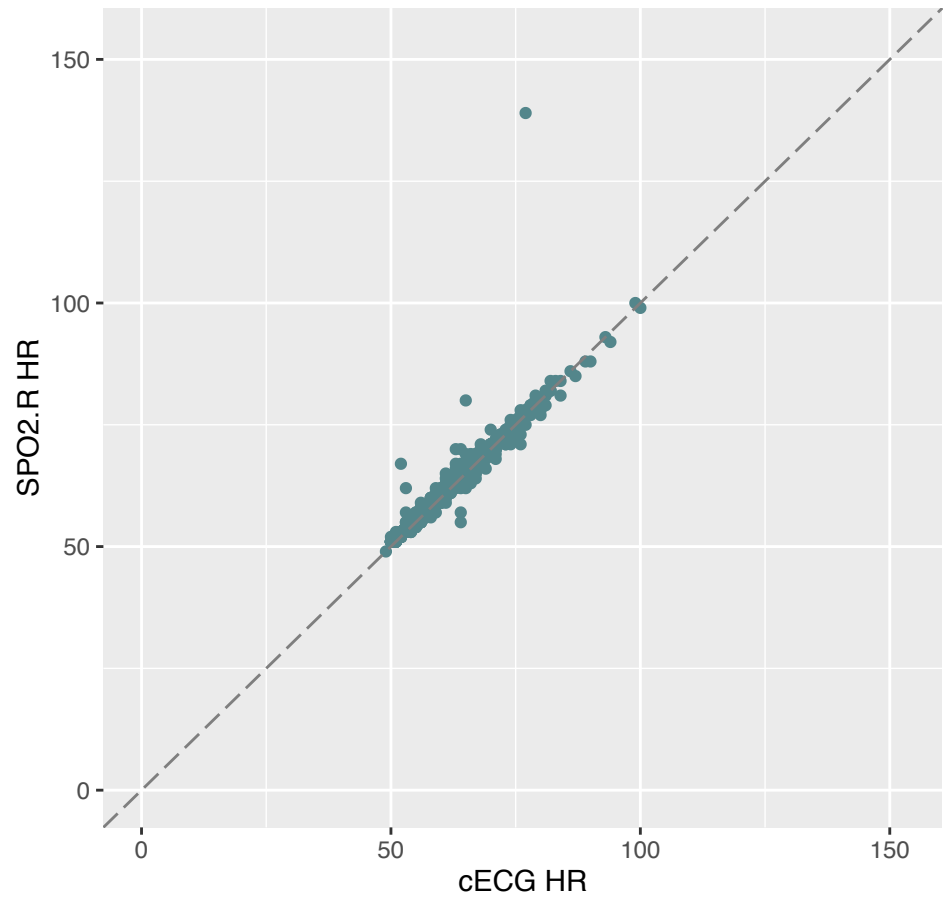

W039

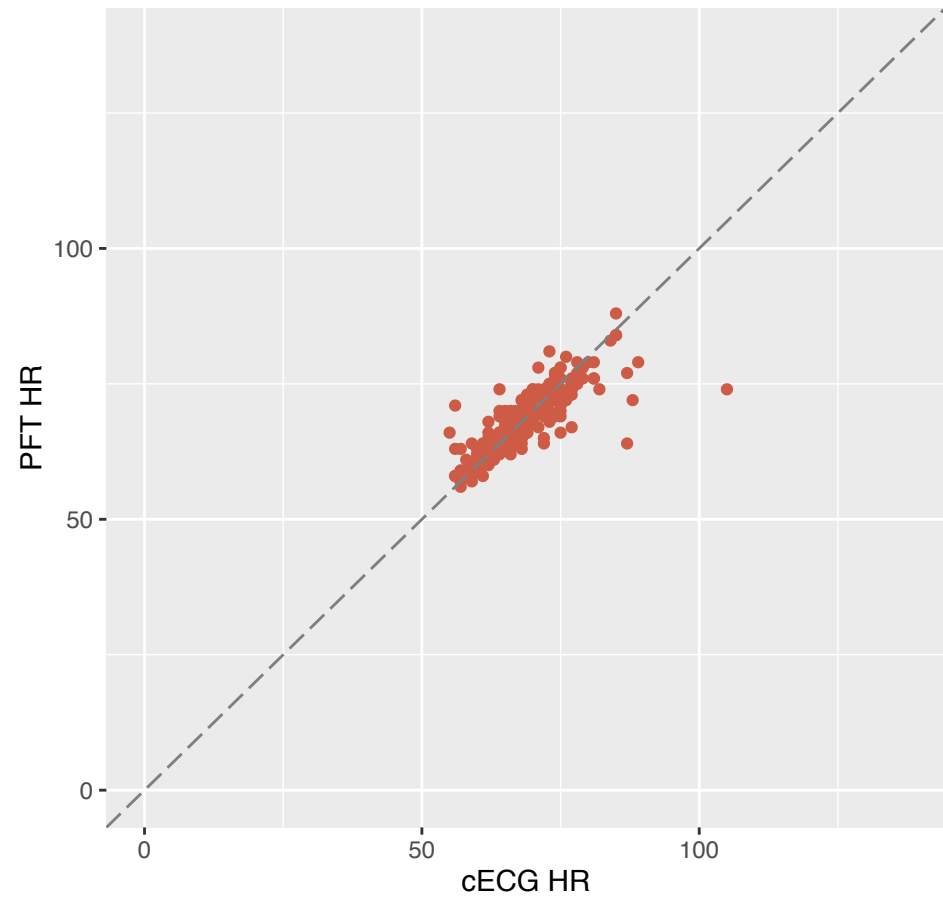

W039

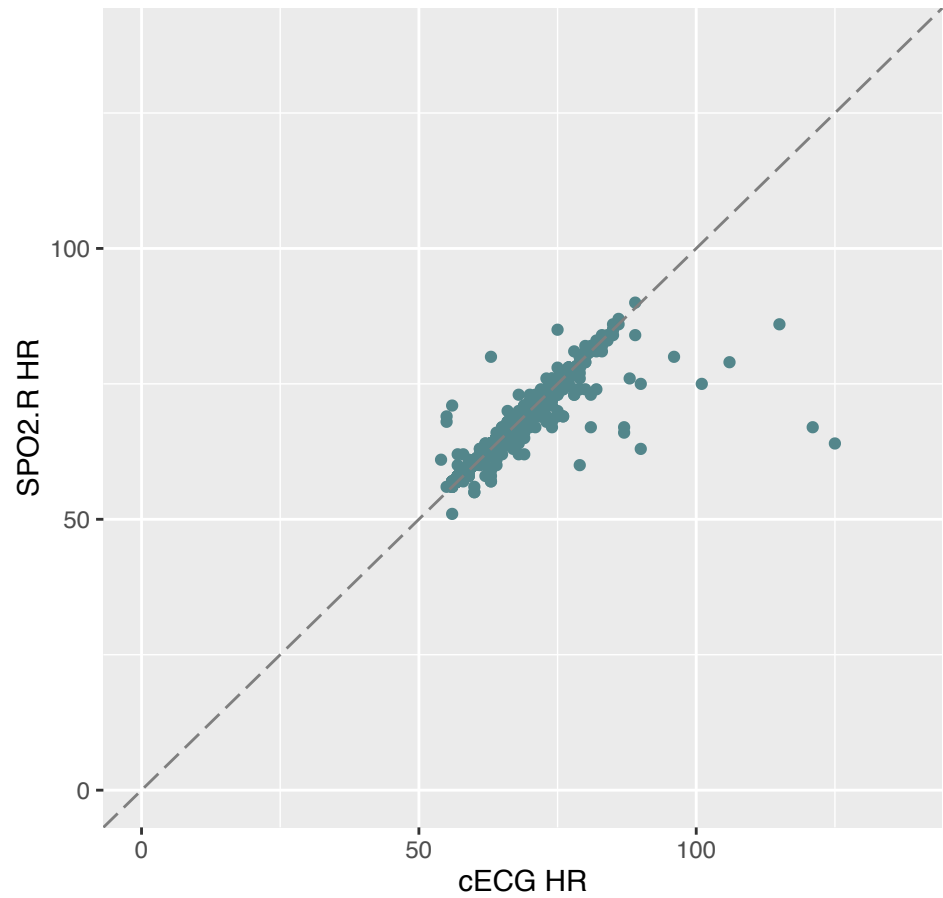

W040

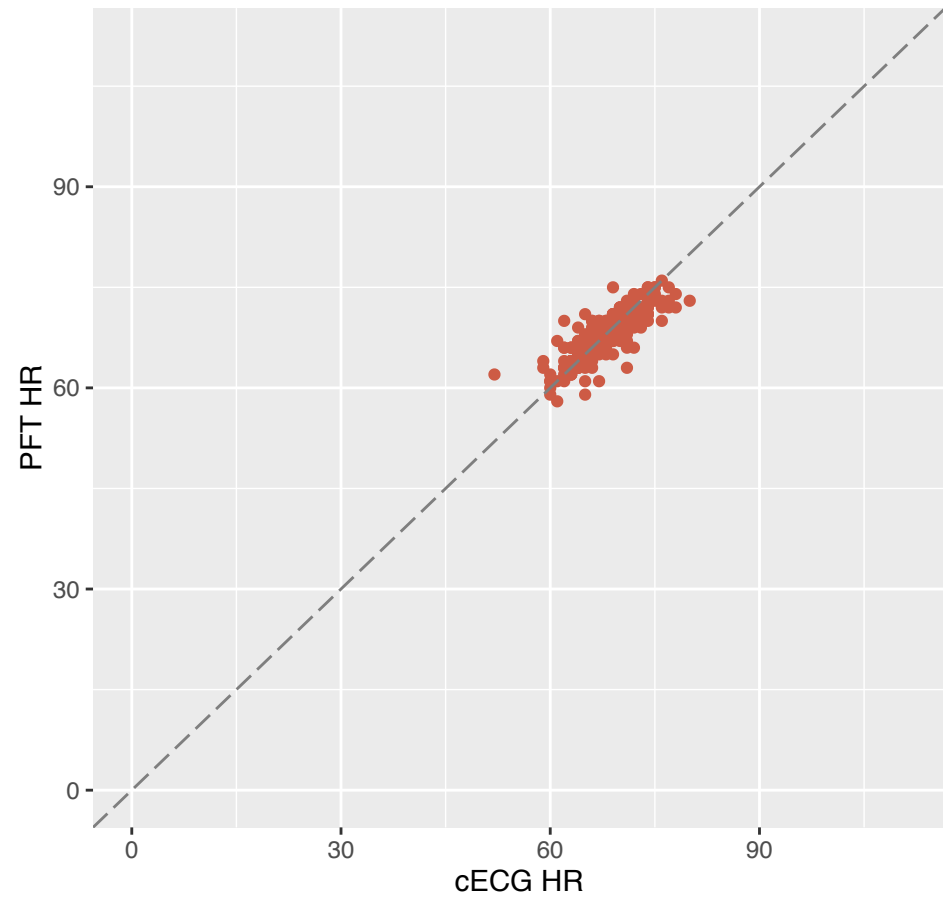

W040

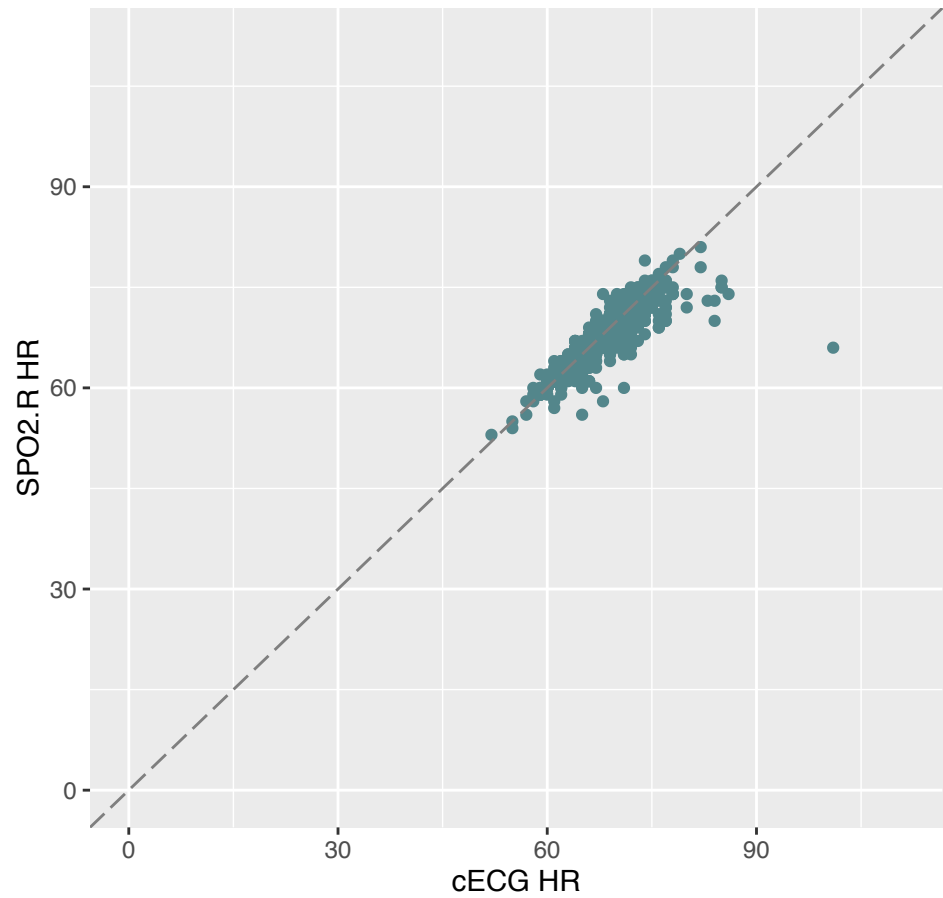

W041

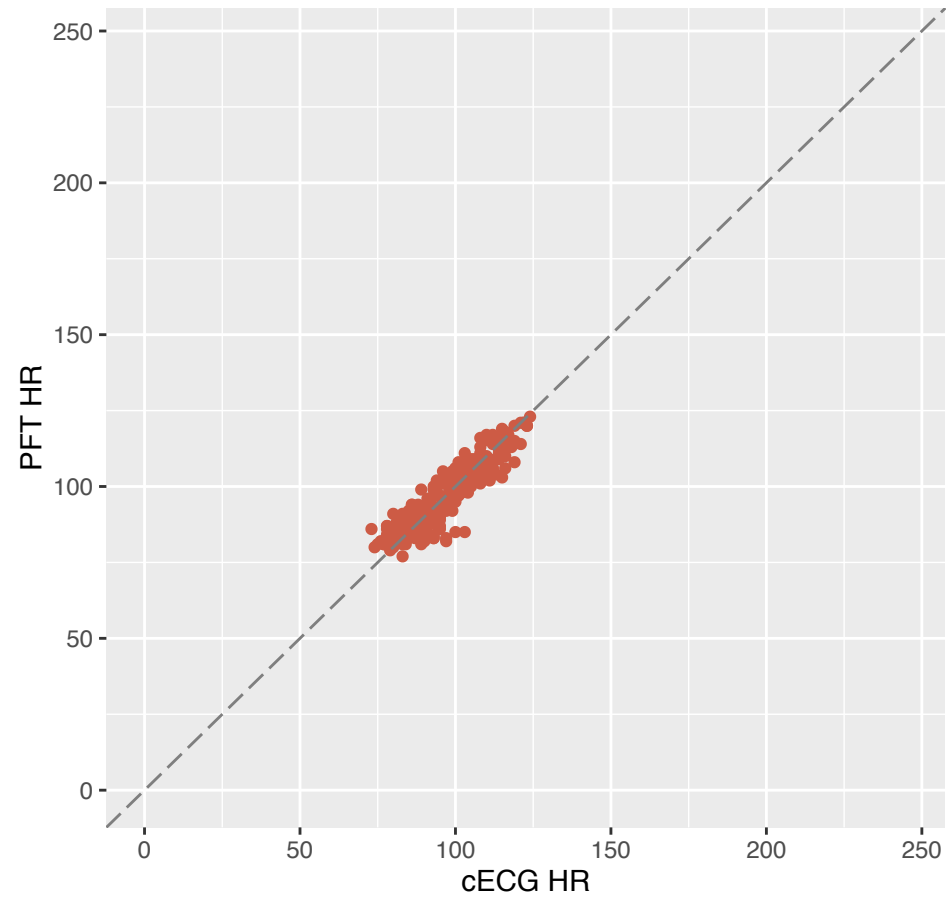

W041

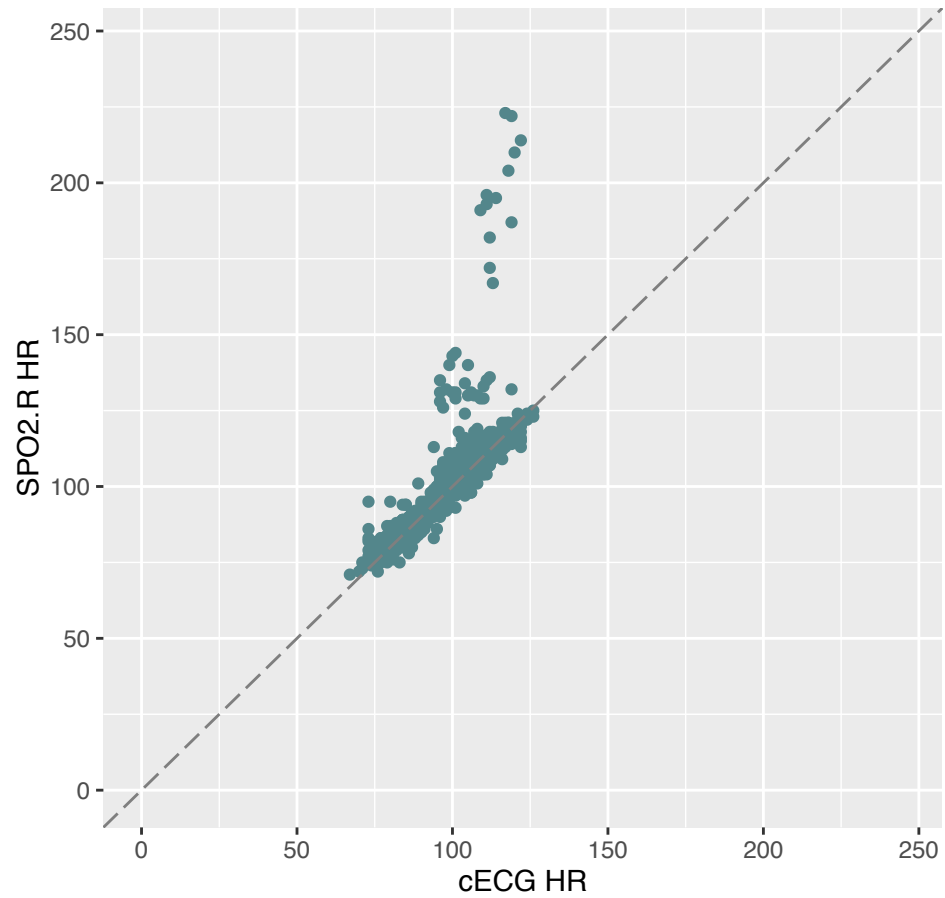

W042

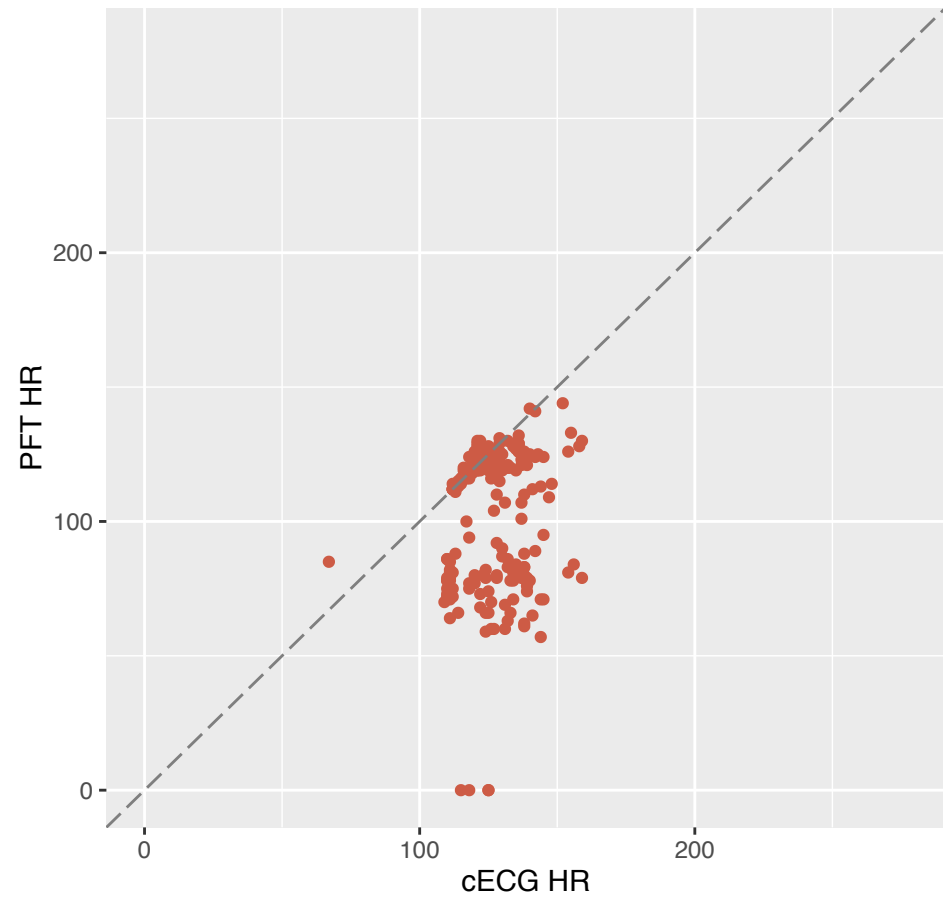

W042

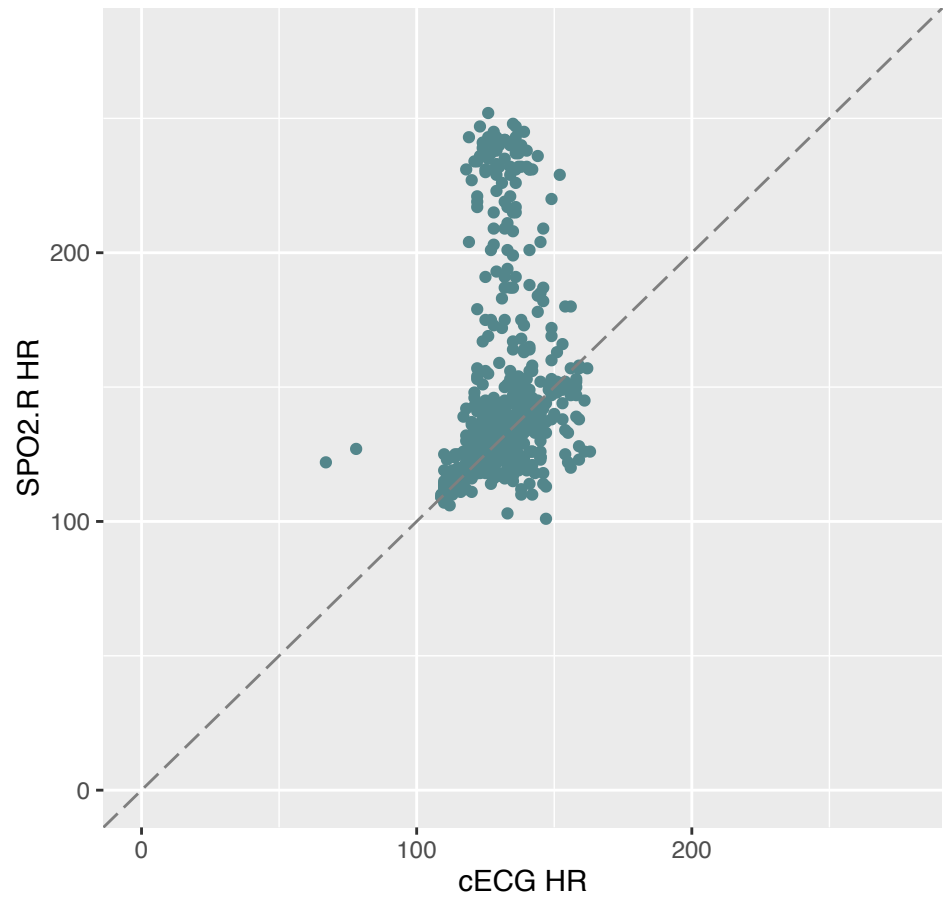



W043

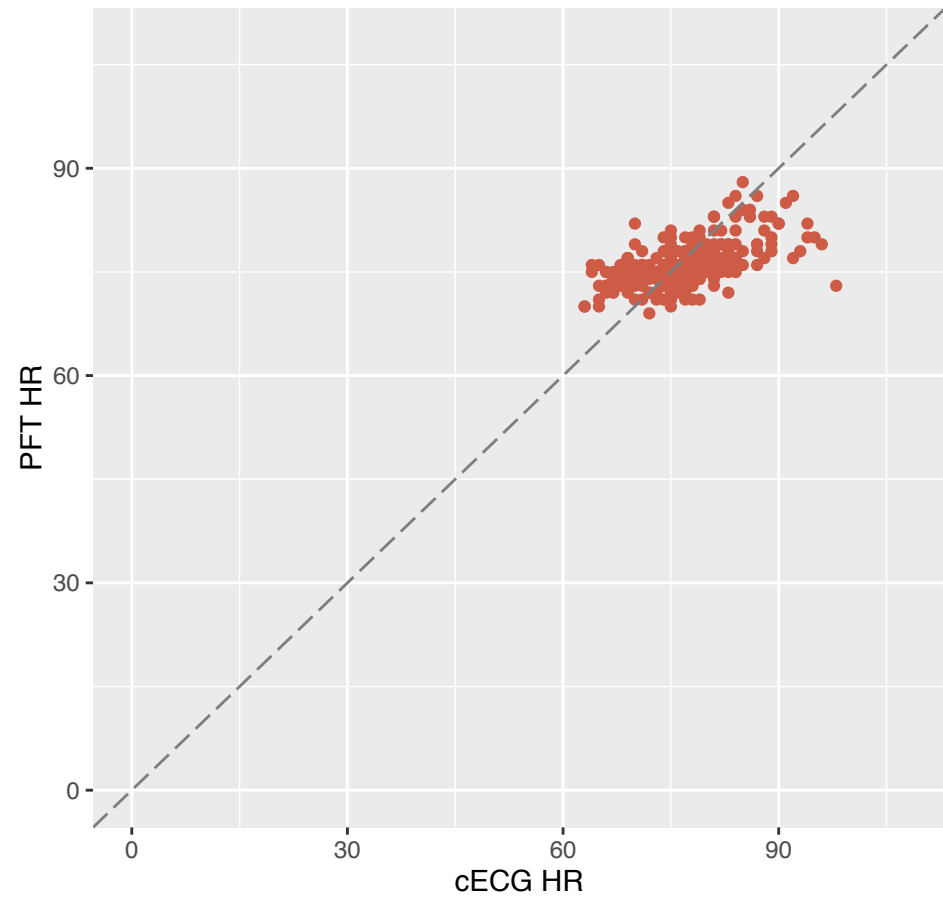

W043

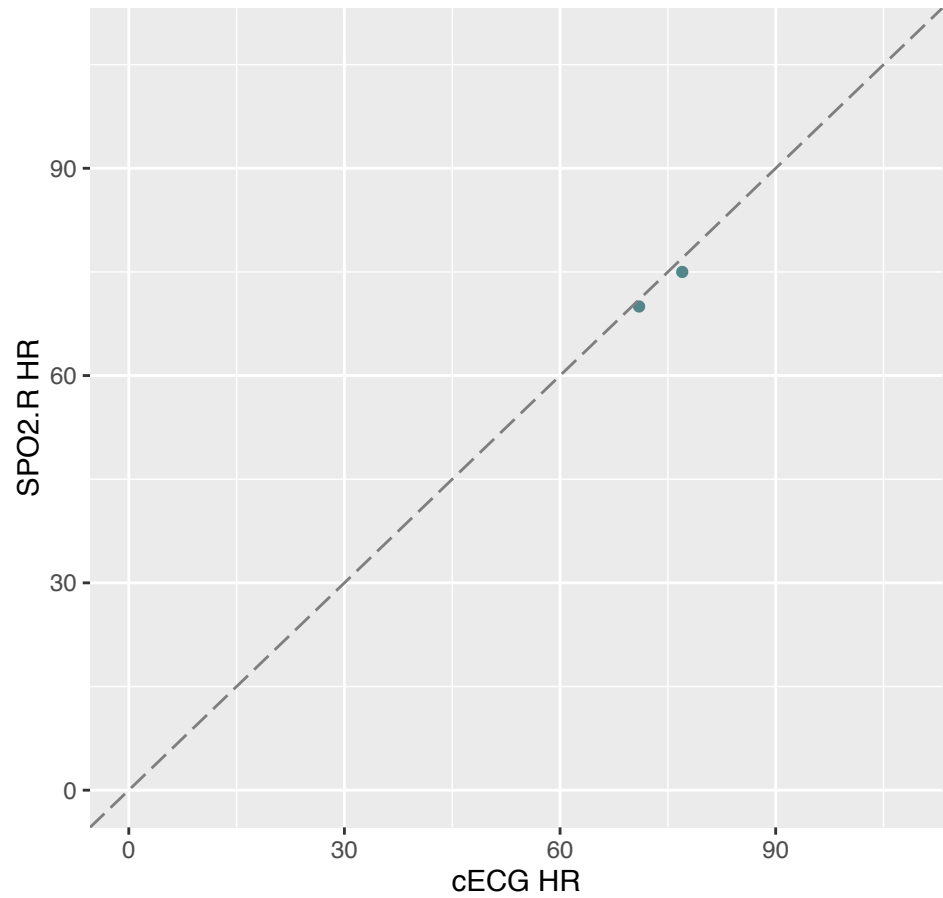

W044

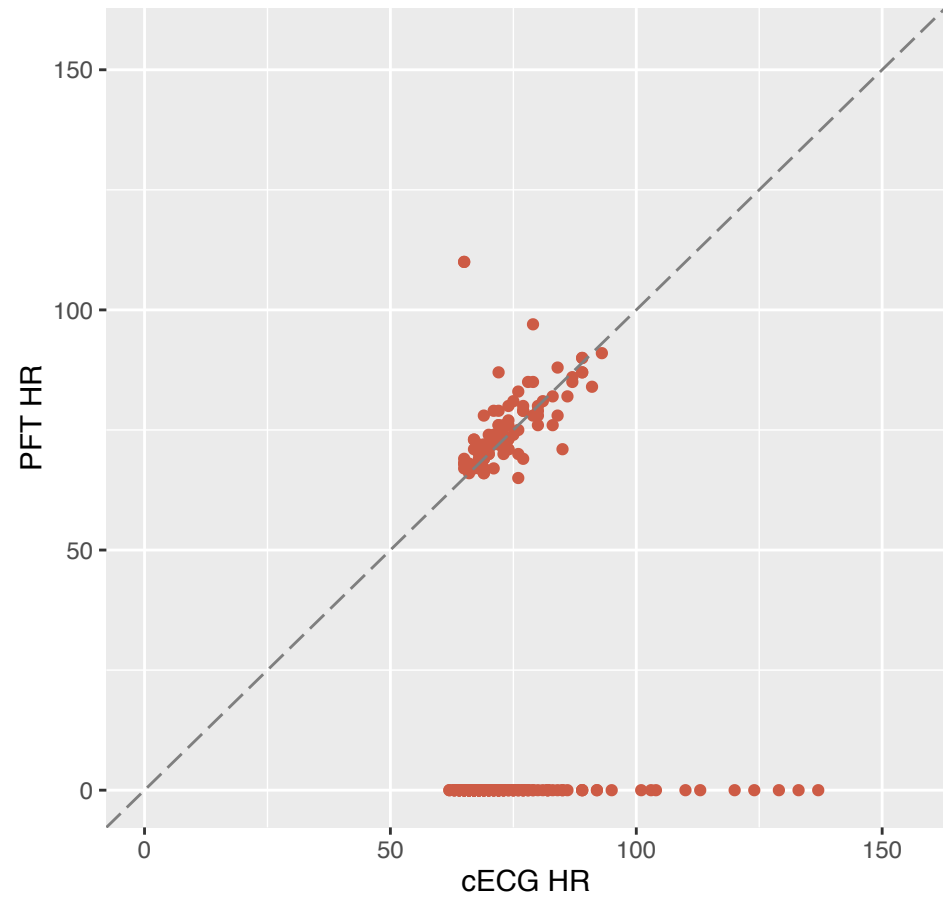

W044

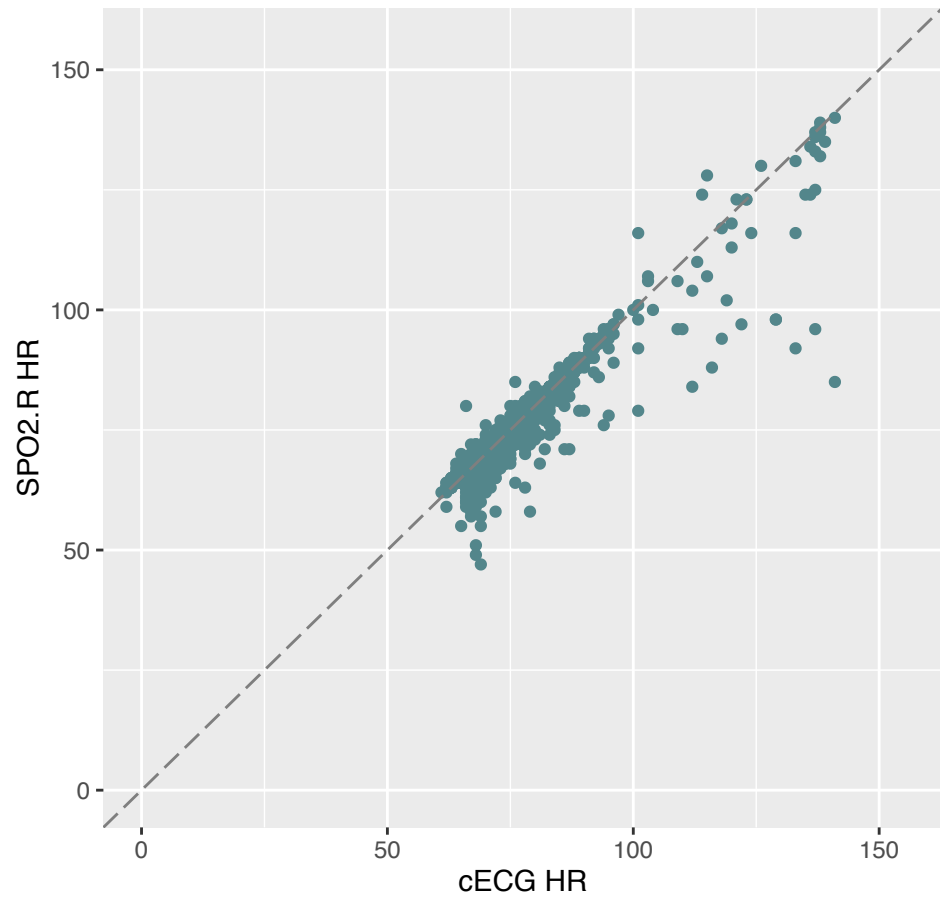

W045

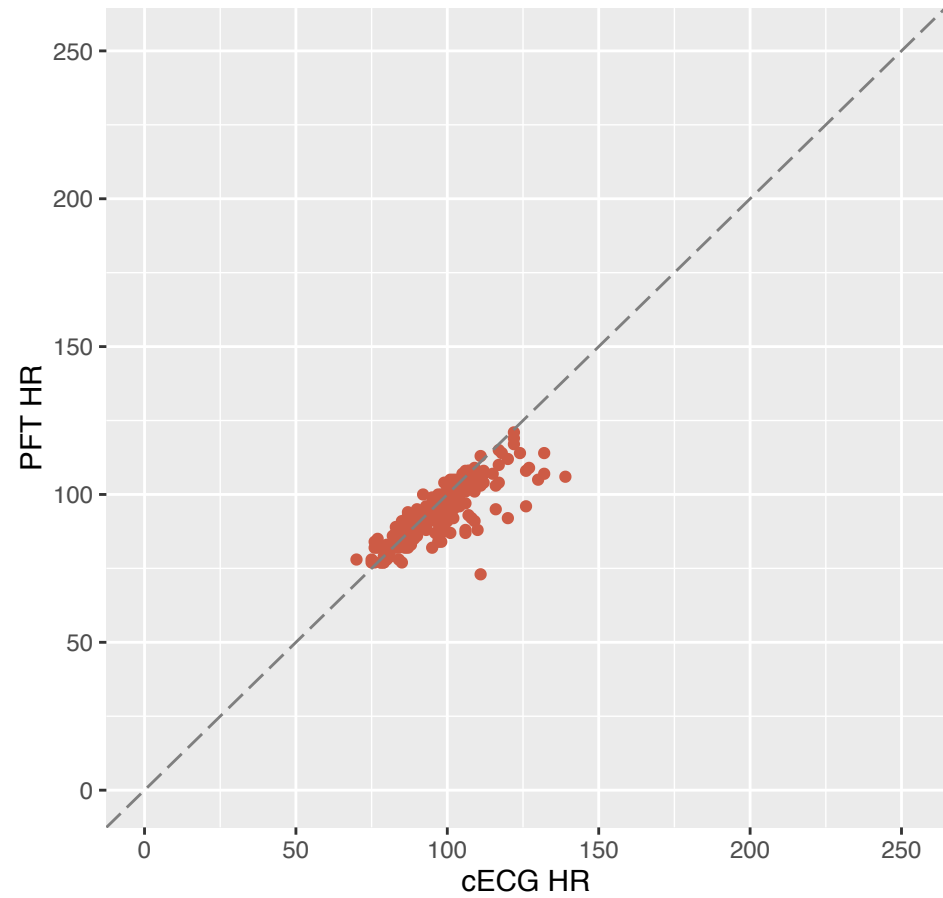

W045

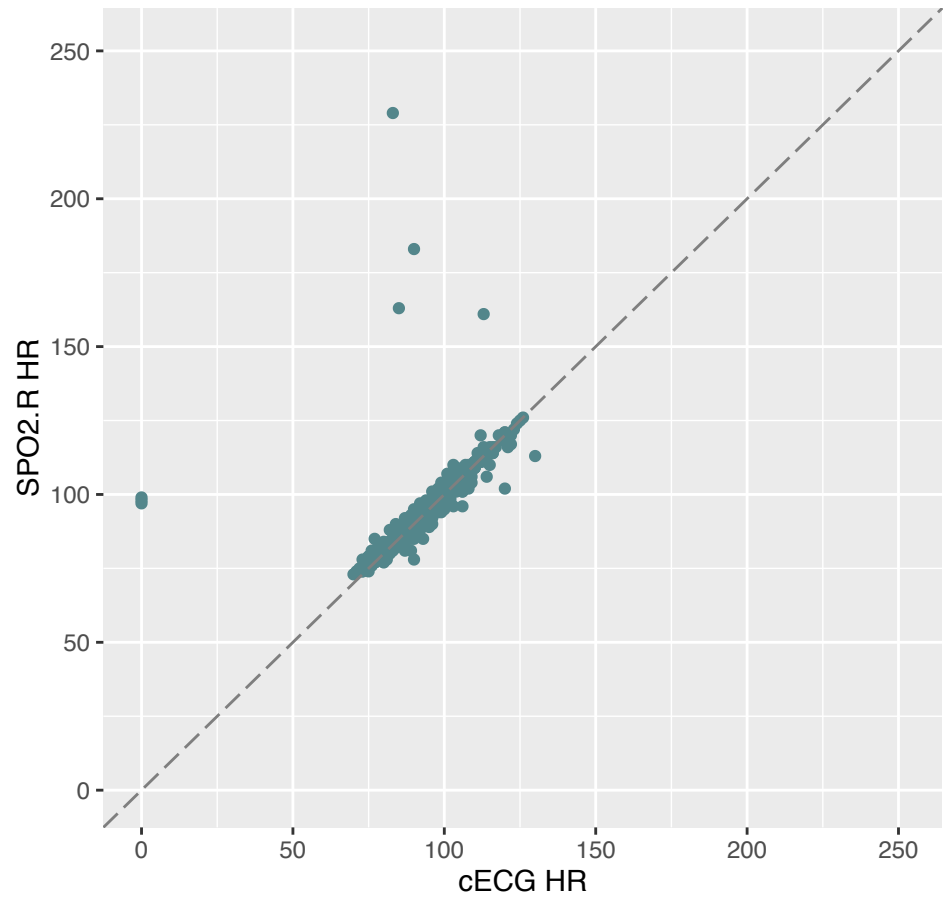

W046

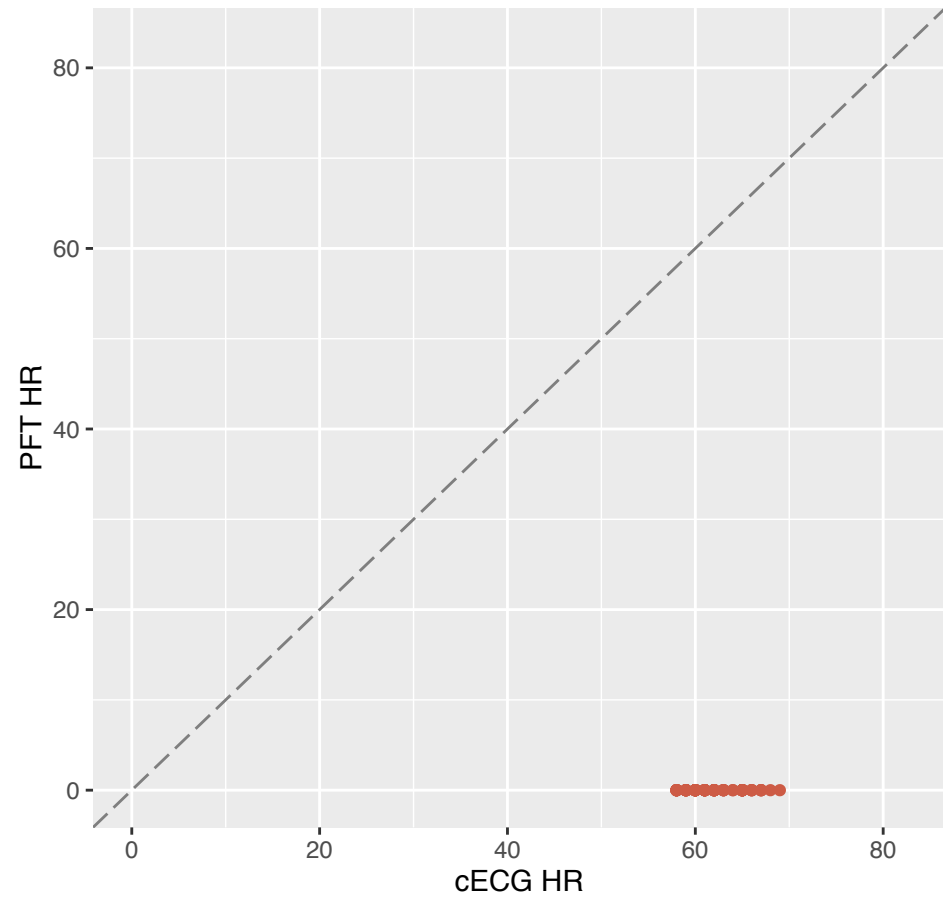

W046

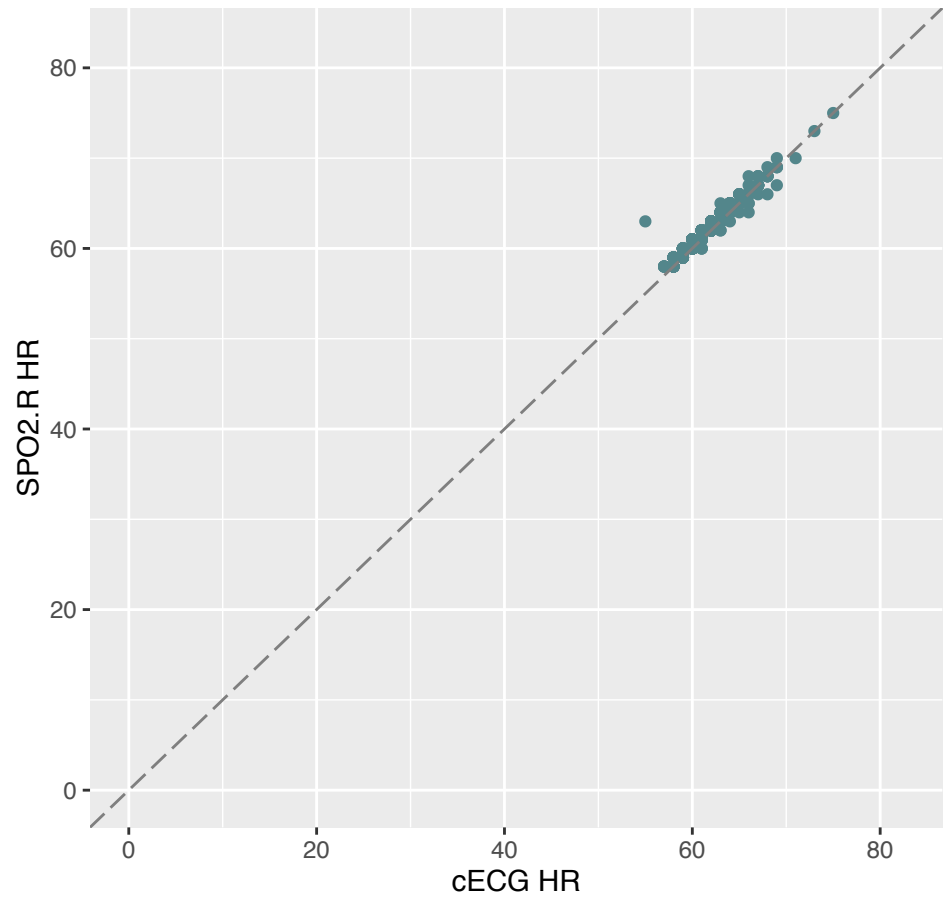

W047

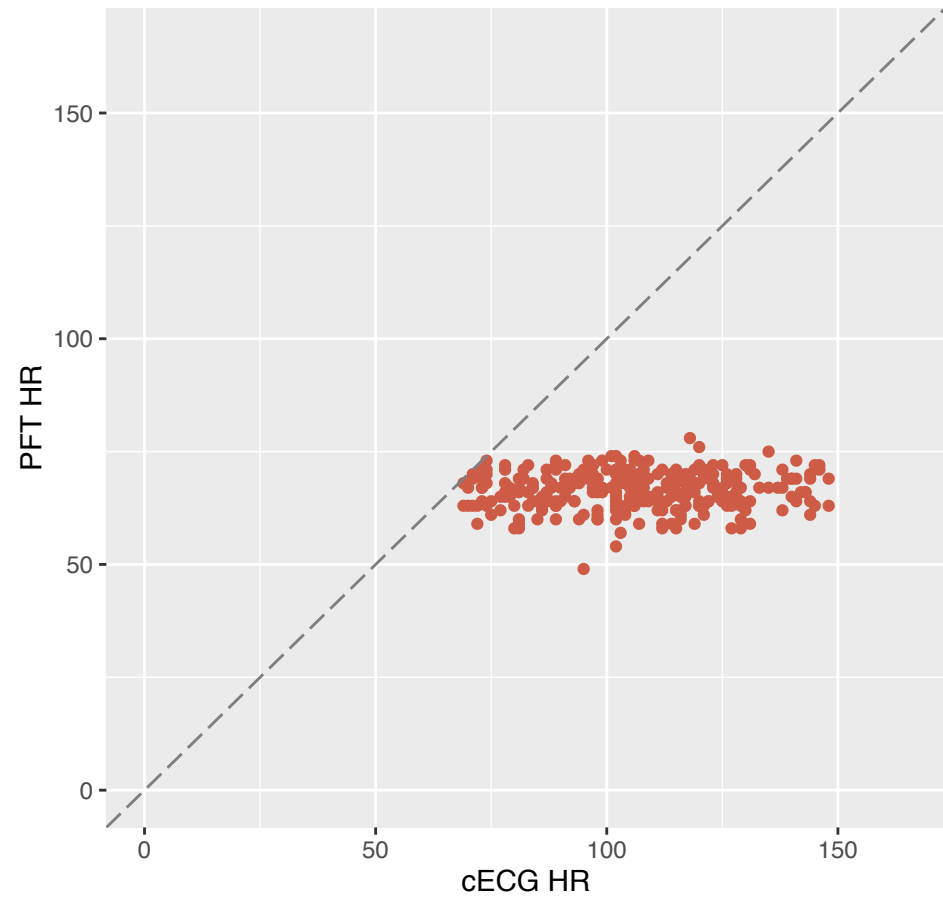

W047

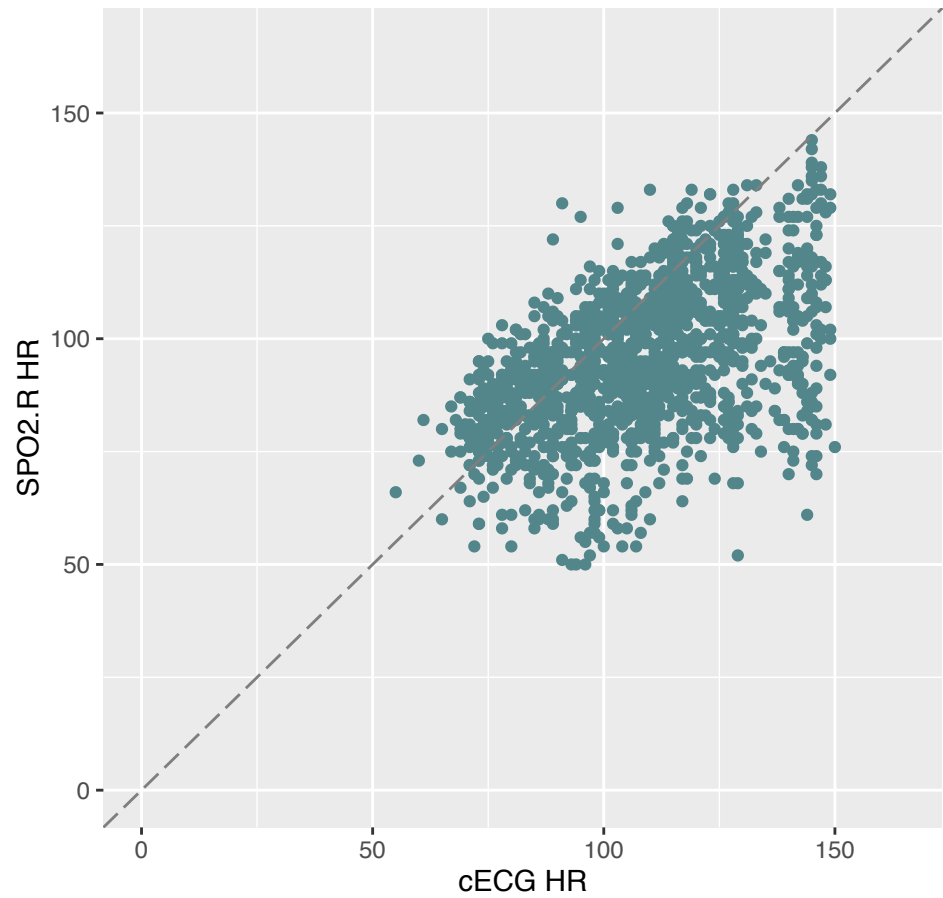

W048

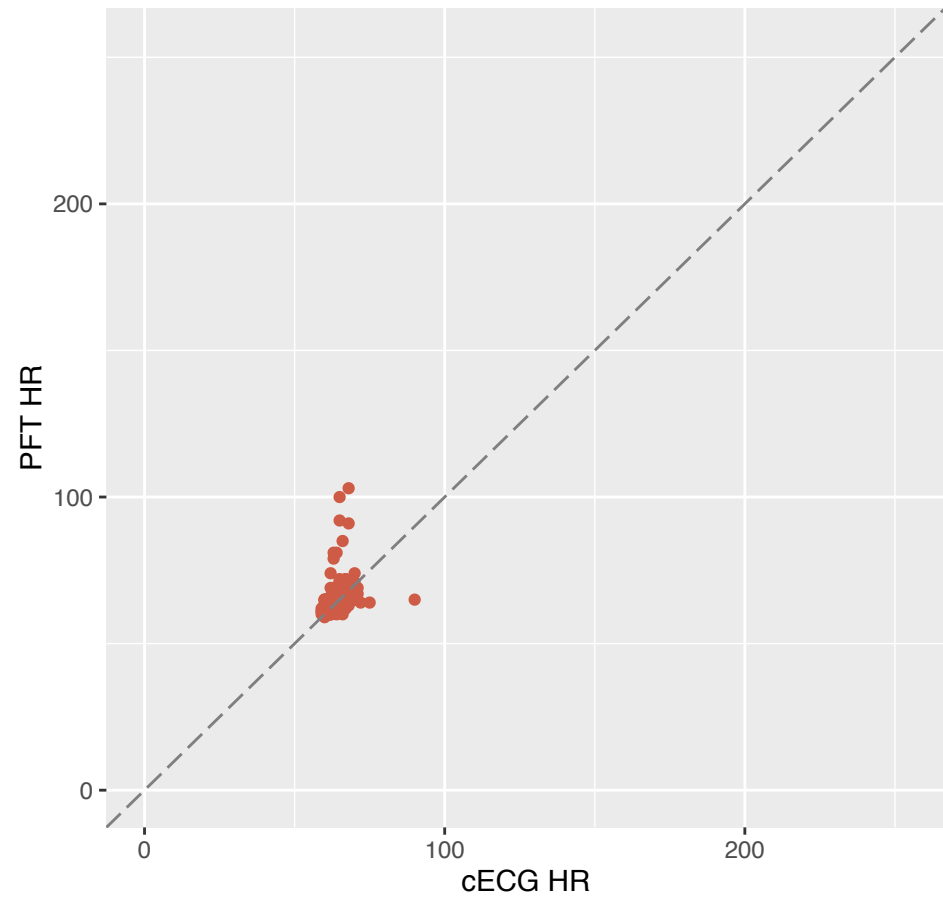

W048

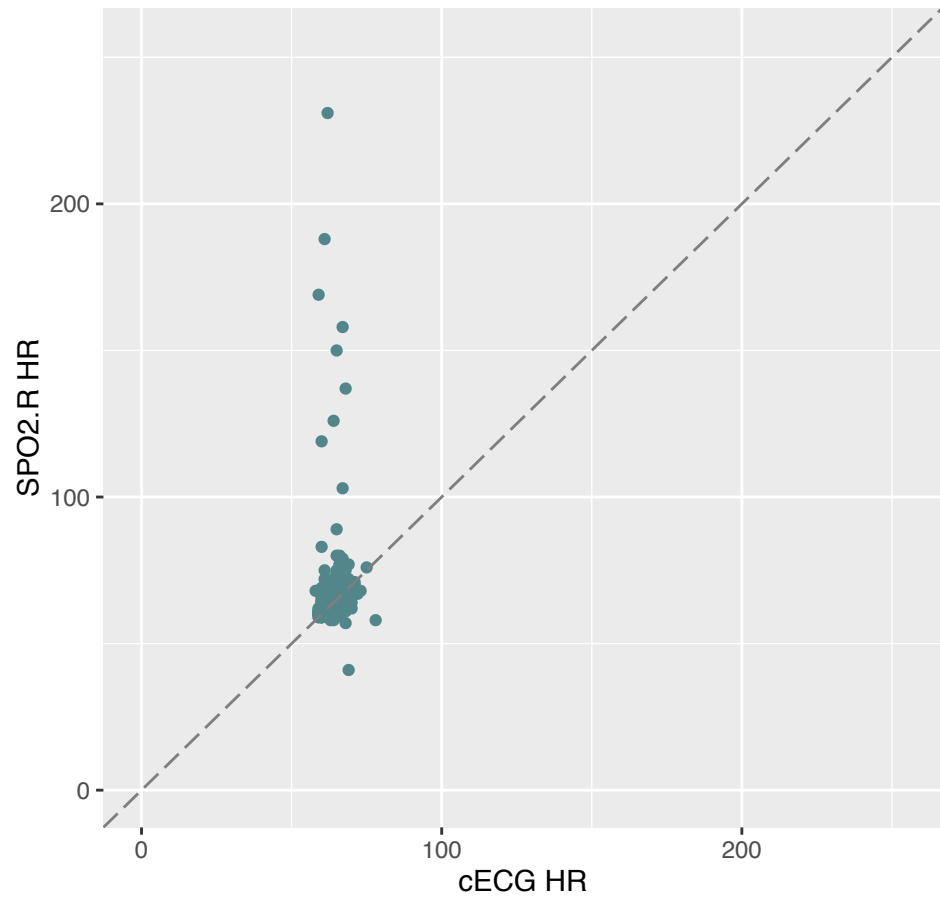

W049

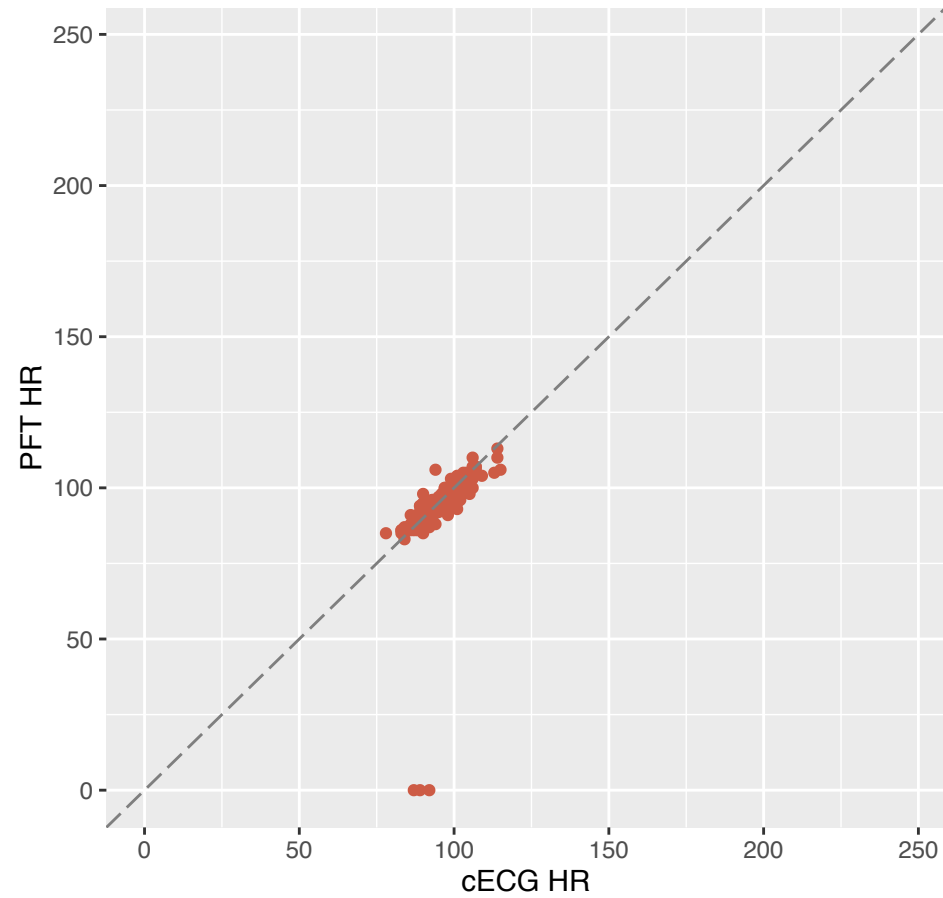

W049

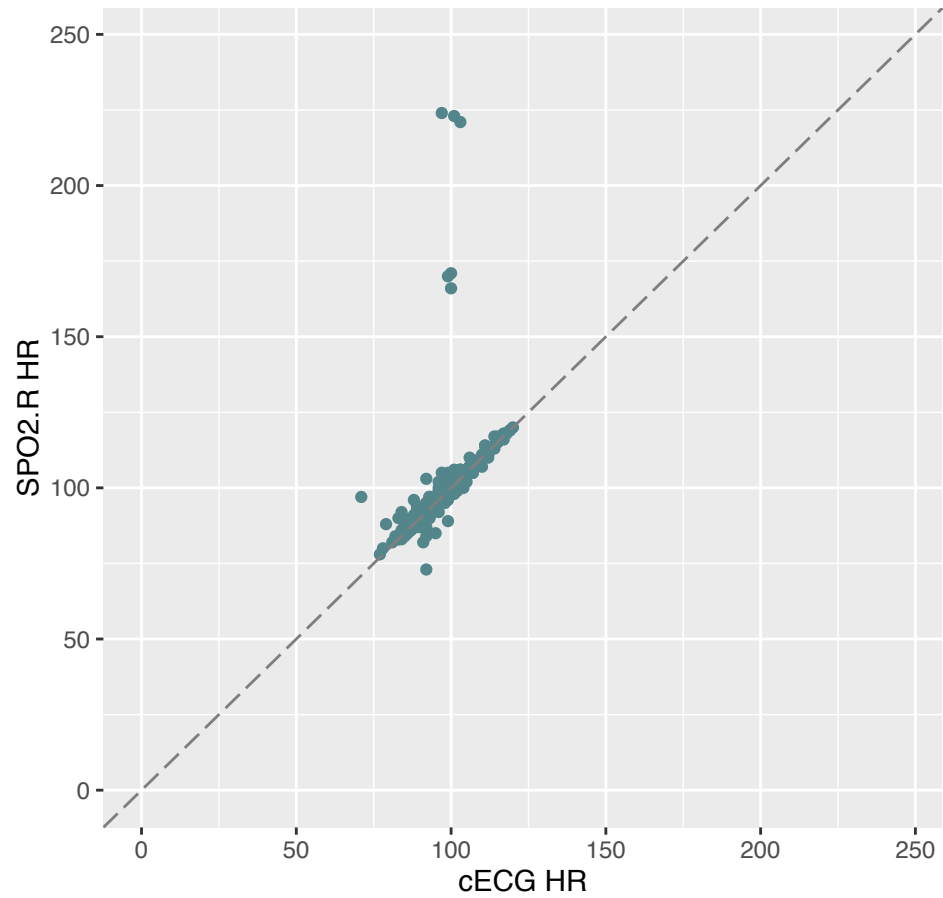

W050

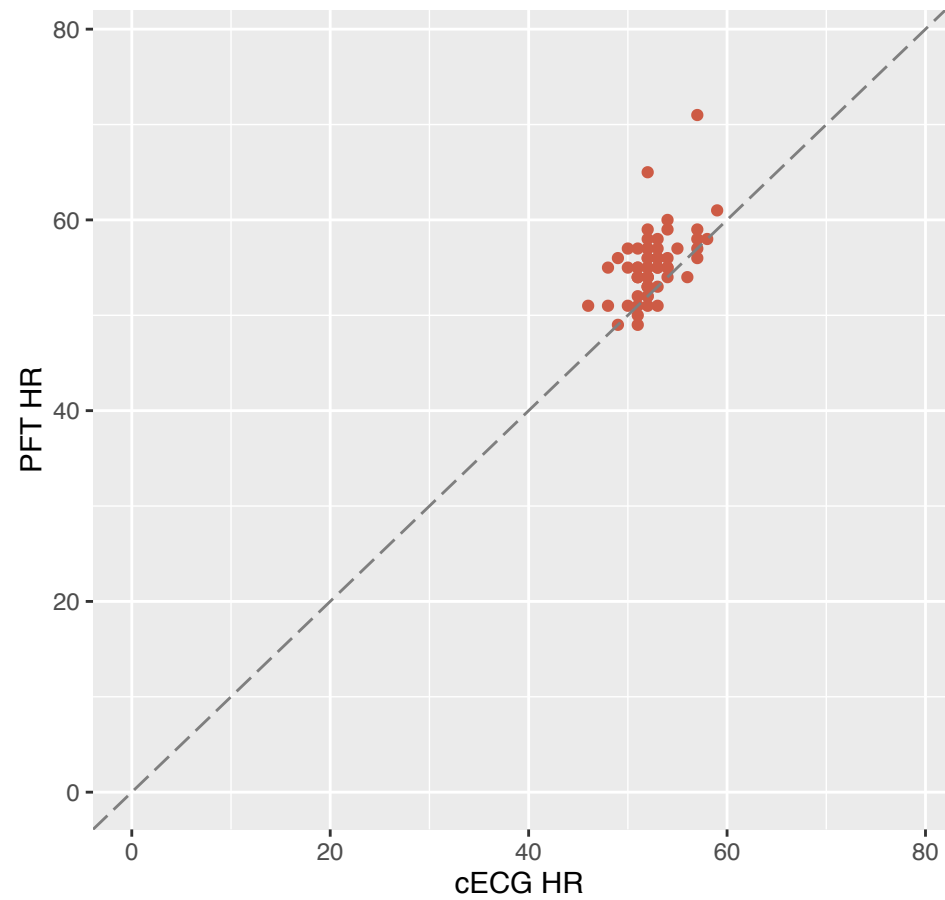

W050

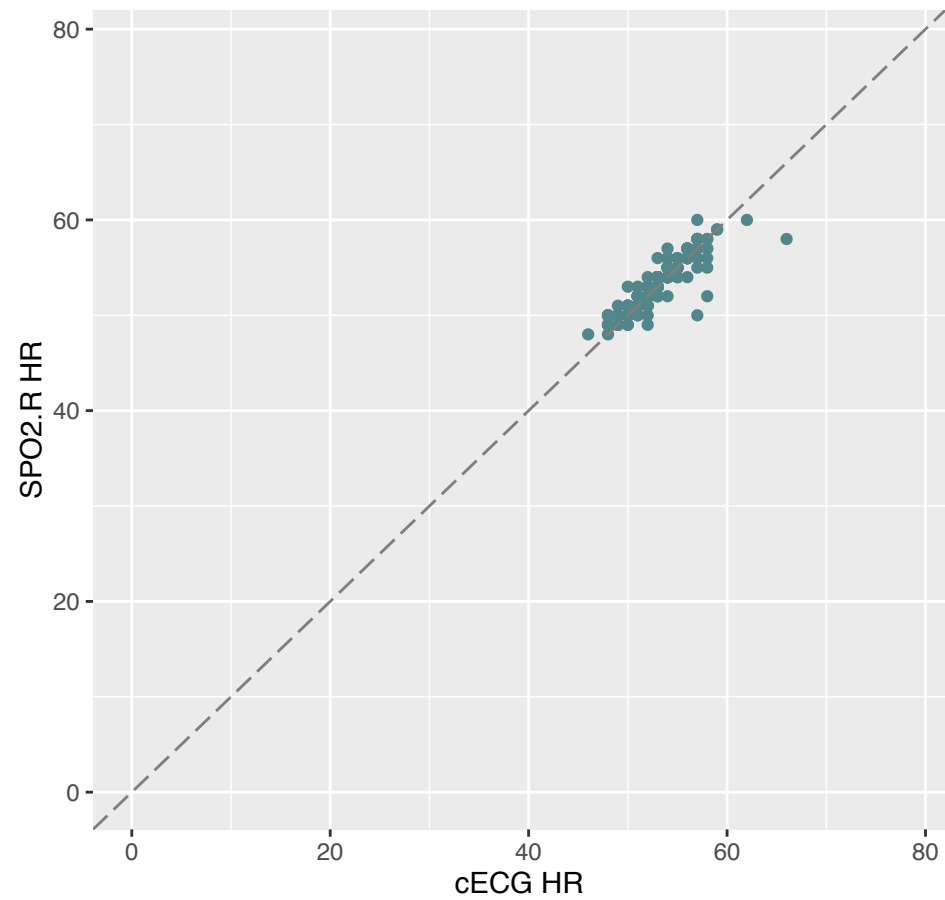



W051

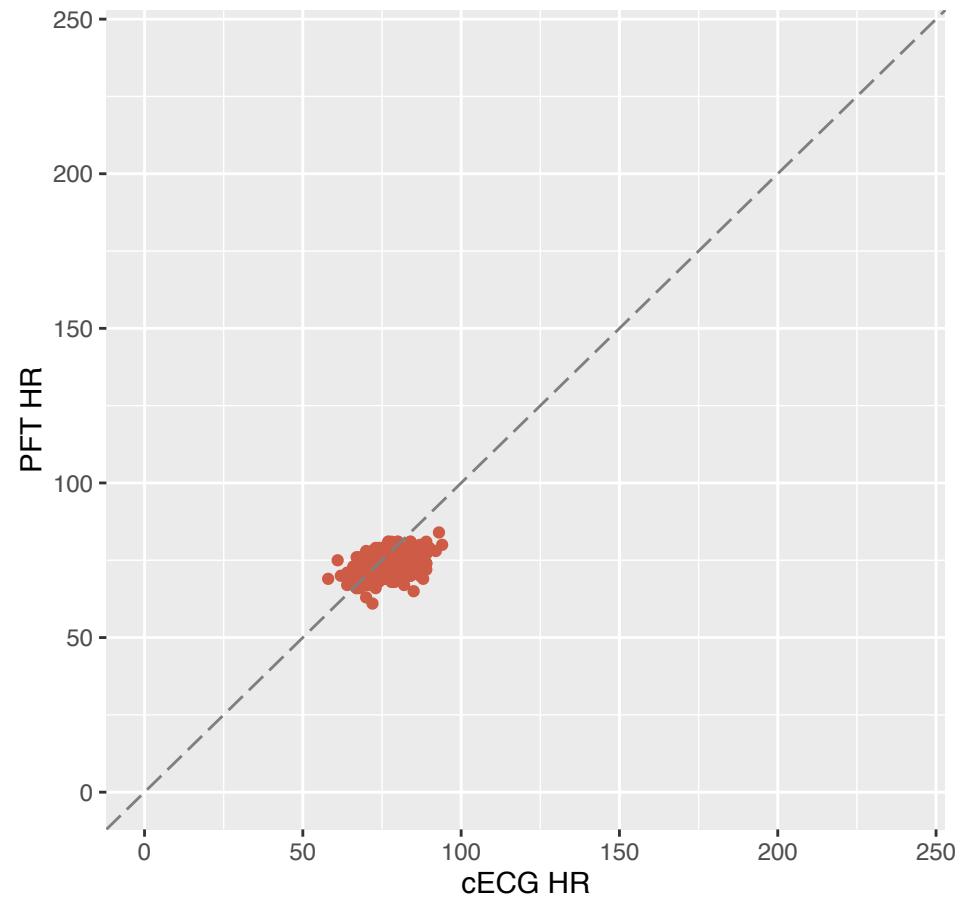

W051

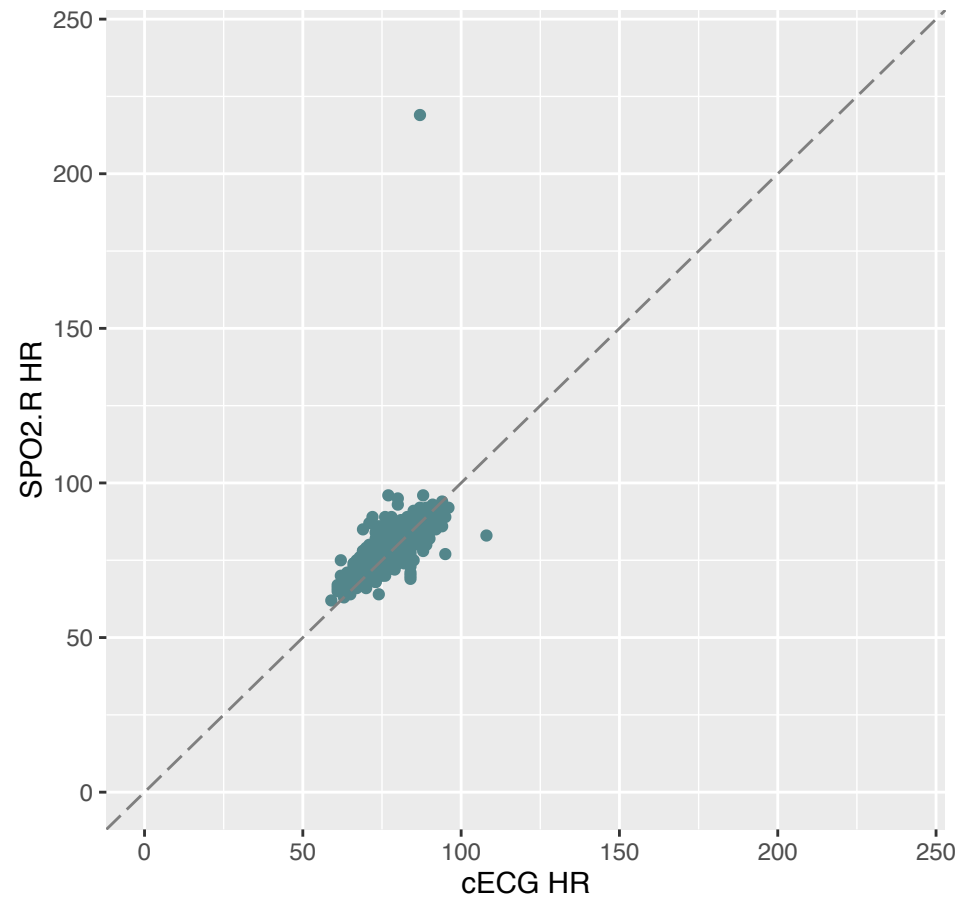

W052

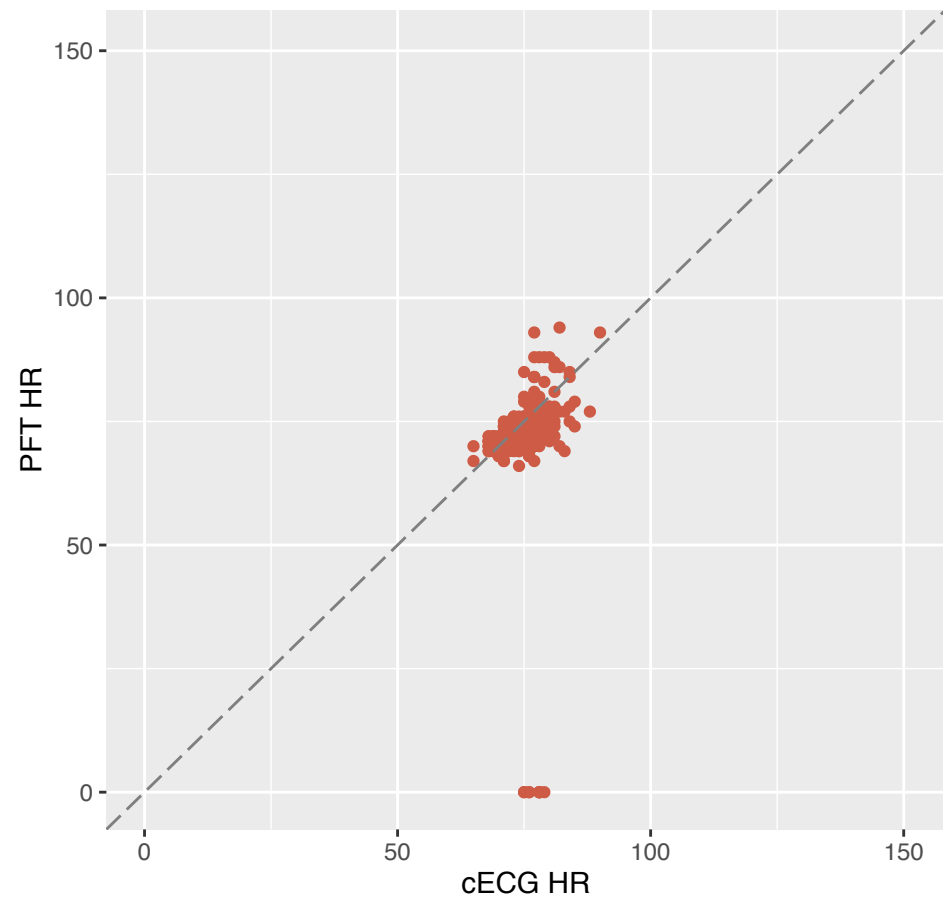

W052

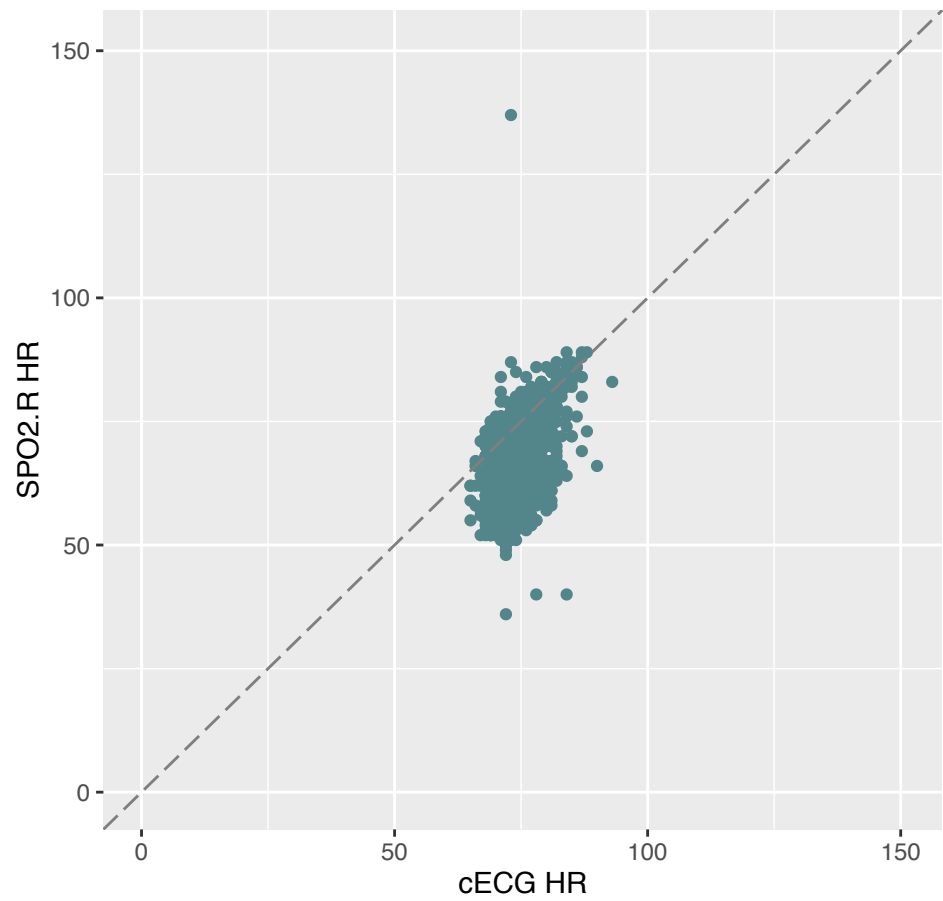

Supplement: jmir_v18i9e253_app4.pdf [file jmir_v18i9e253_app4.pdf]
