# Supplementary material for: Accuracy of a Wrist-Worn Wearable Device for Monitoring Heart Rates in Hospital Inpatients: A Prospective Observational Study
Source: PubMed Central journal article supplement (PMC5050383; doi:10.2196/jmir.6025), 2016-09-20
Supplement: jmir_v18i9e253_app1.pdf [file jmir_v18i9e253_app1.pdf]

# W002

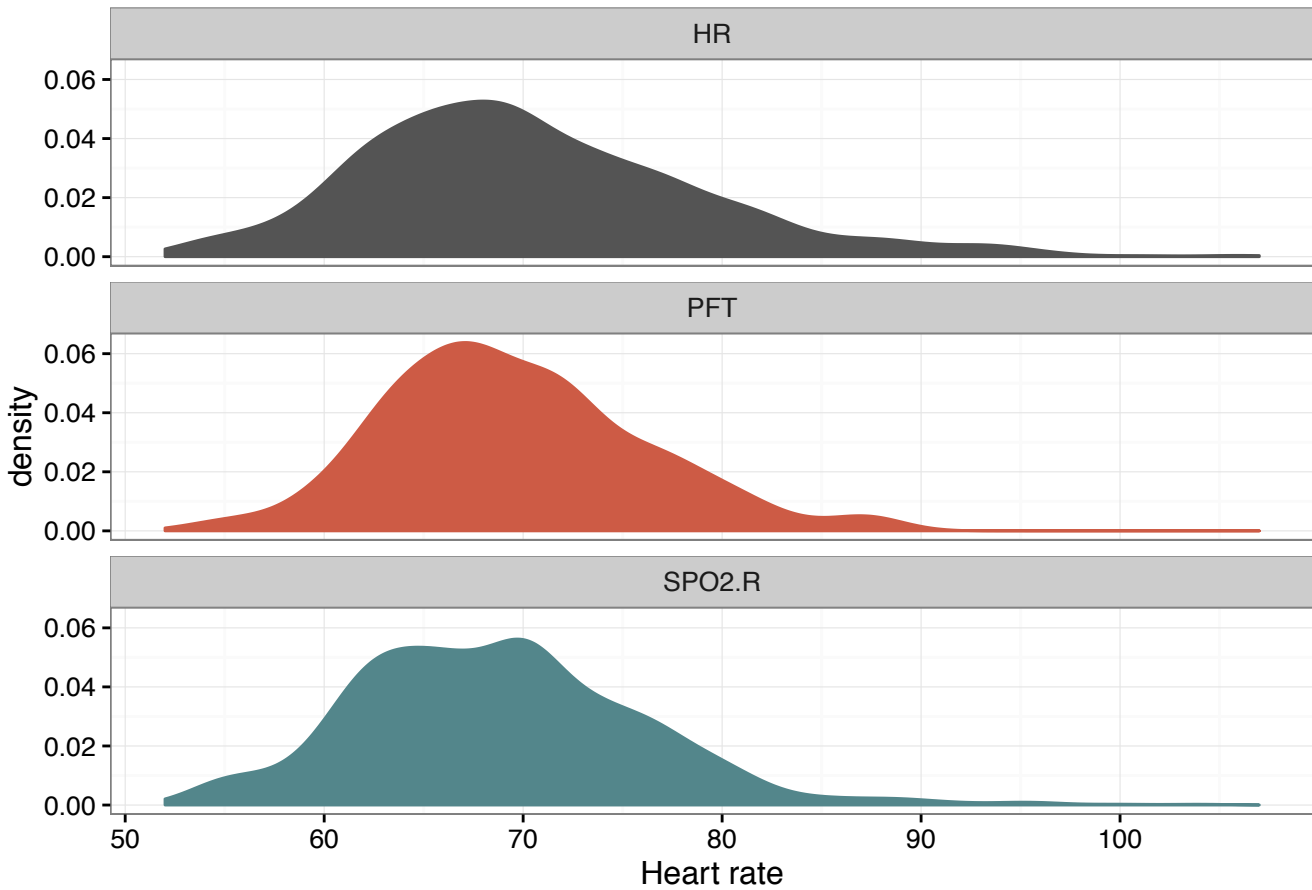

# W004

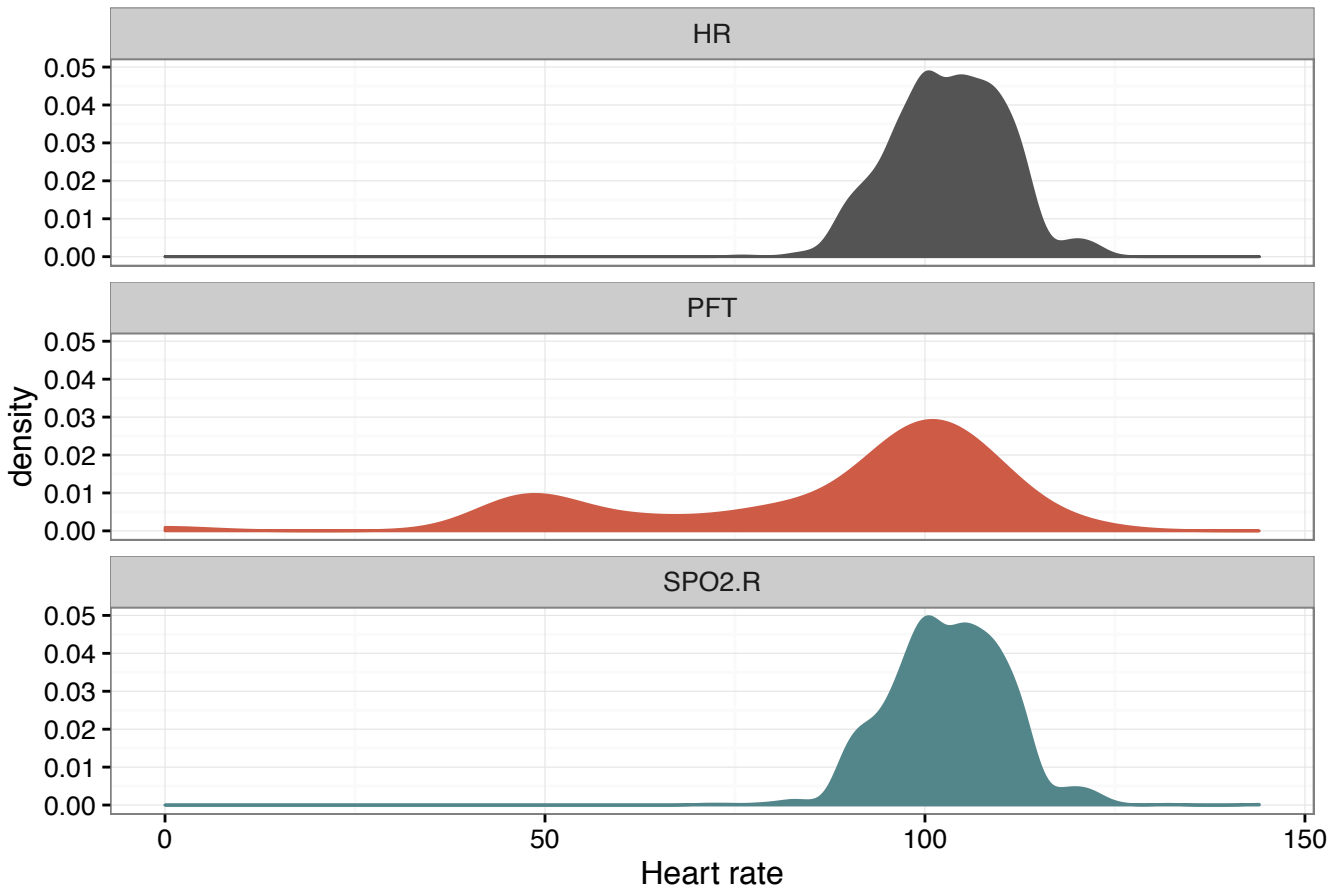

# W005

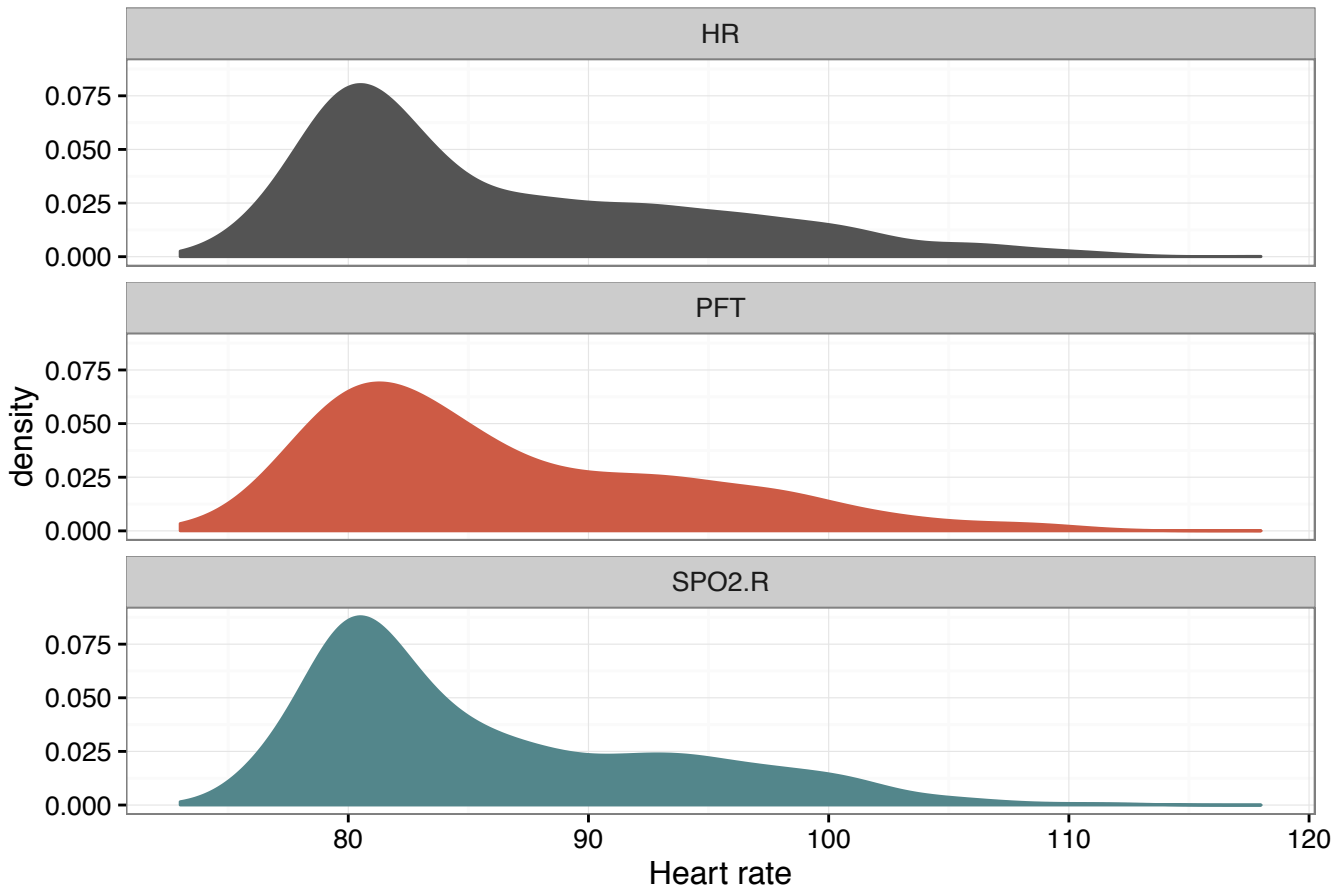

# W006

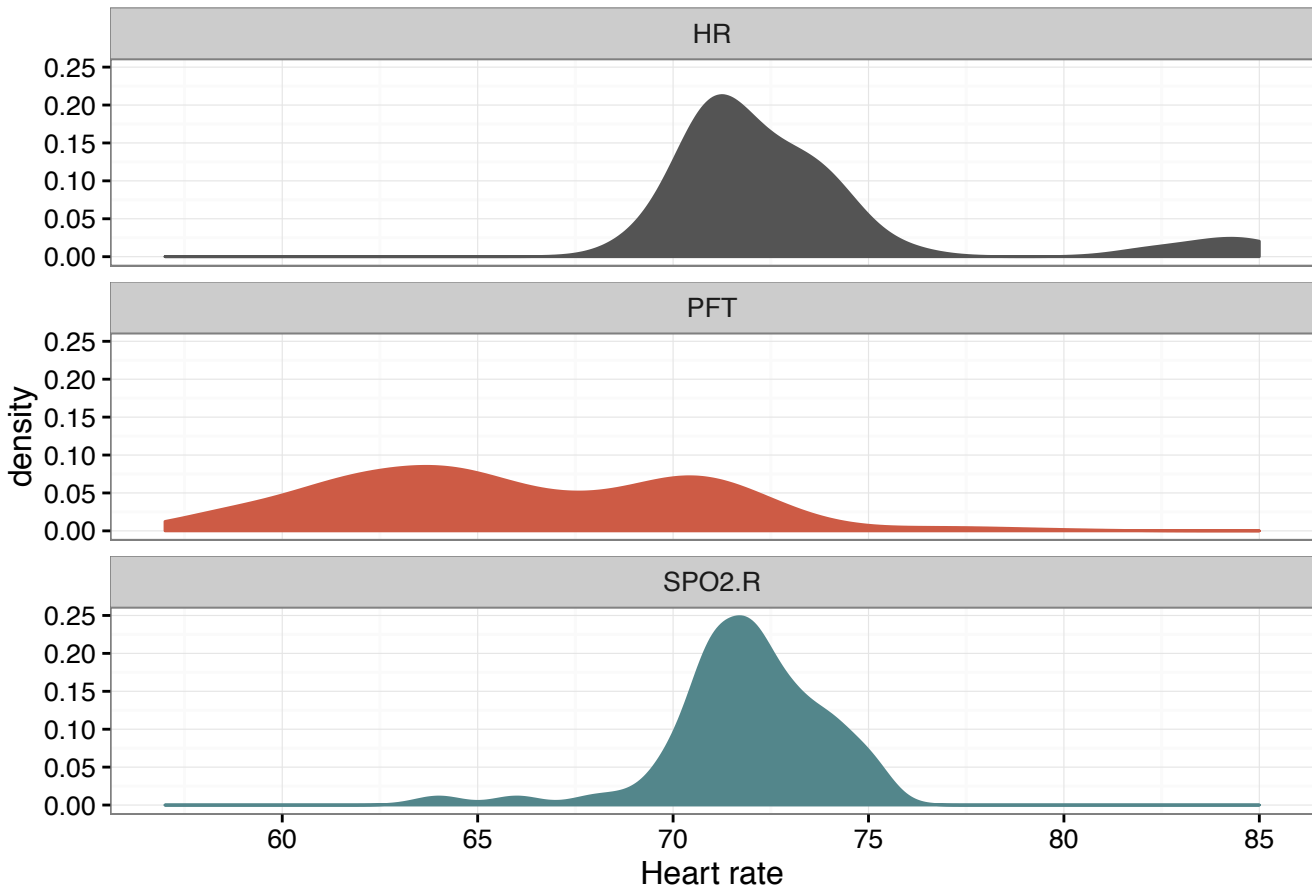

# W007

HR

0.10  
0.05  
0.00

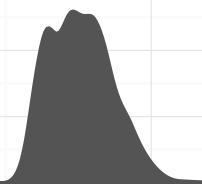

PFT

density

0.10  
0.05  
0.00

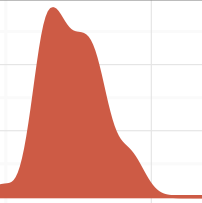

SPO2.R

0.10  
0.05  
0.00

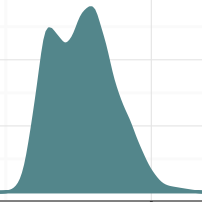

75

100

125

150

Heart rate

# W008

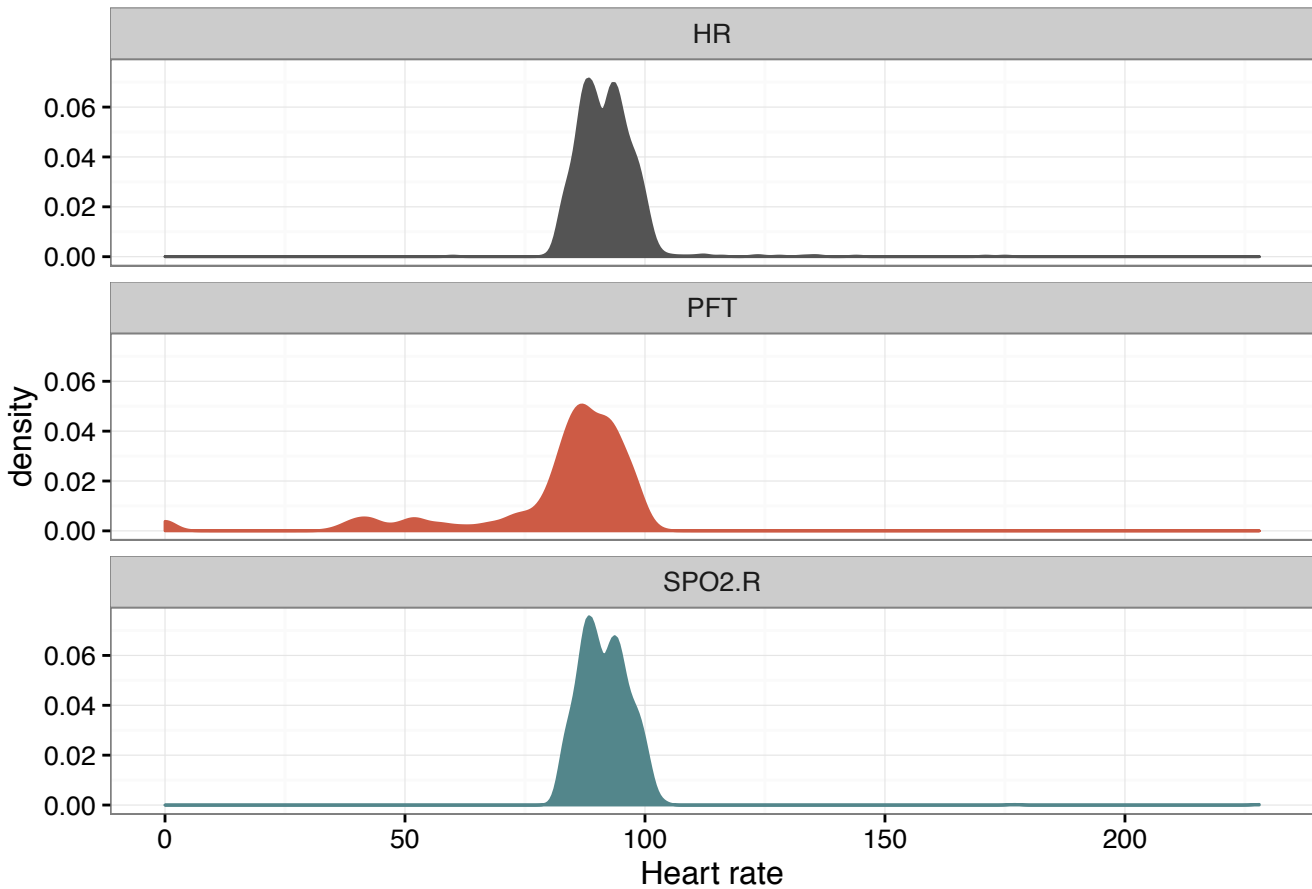

# W009

HR

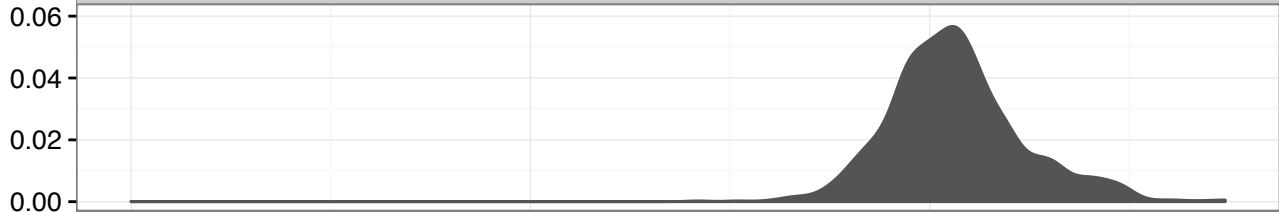

PFT

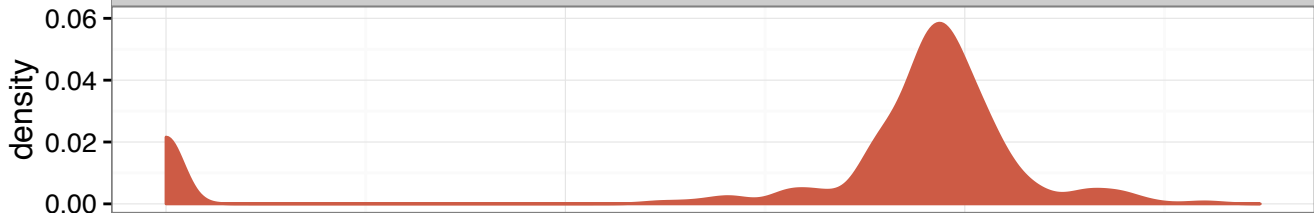

SPO2.R

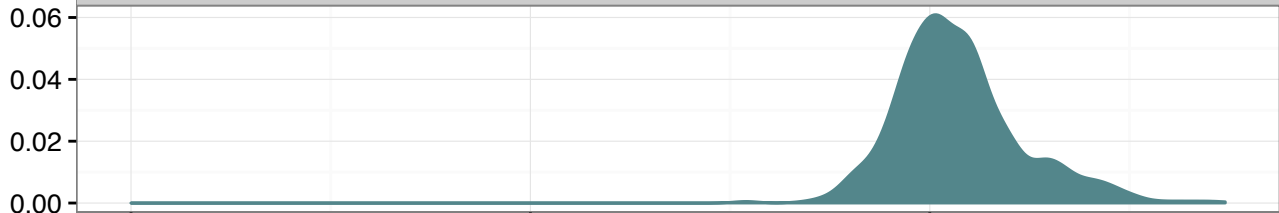

0

50

100

Heart rate

# W010

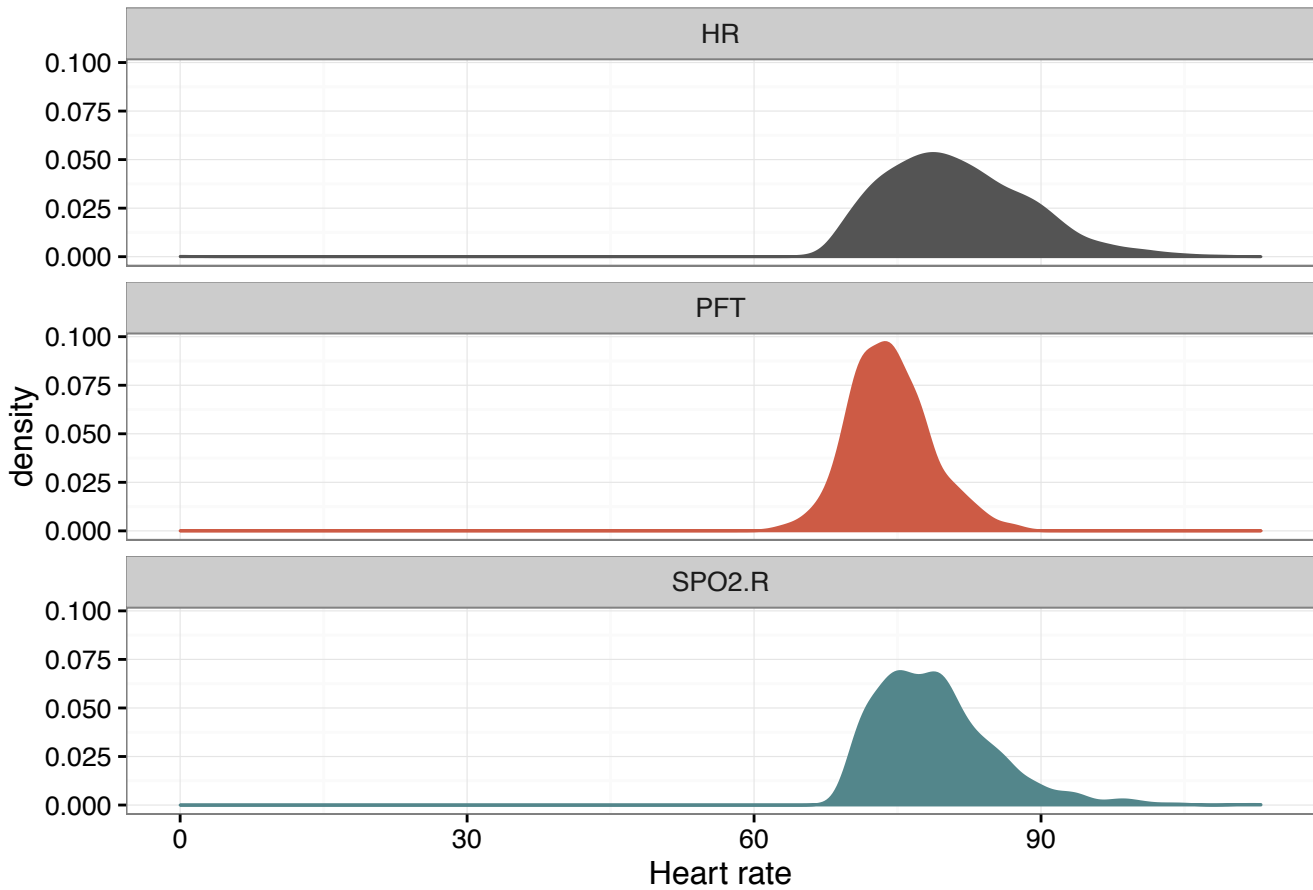



# W011

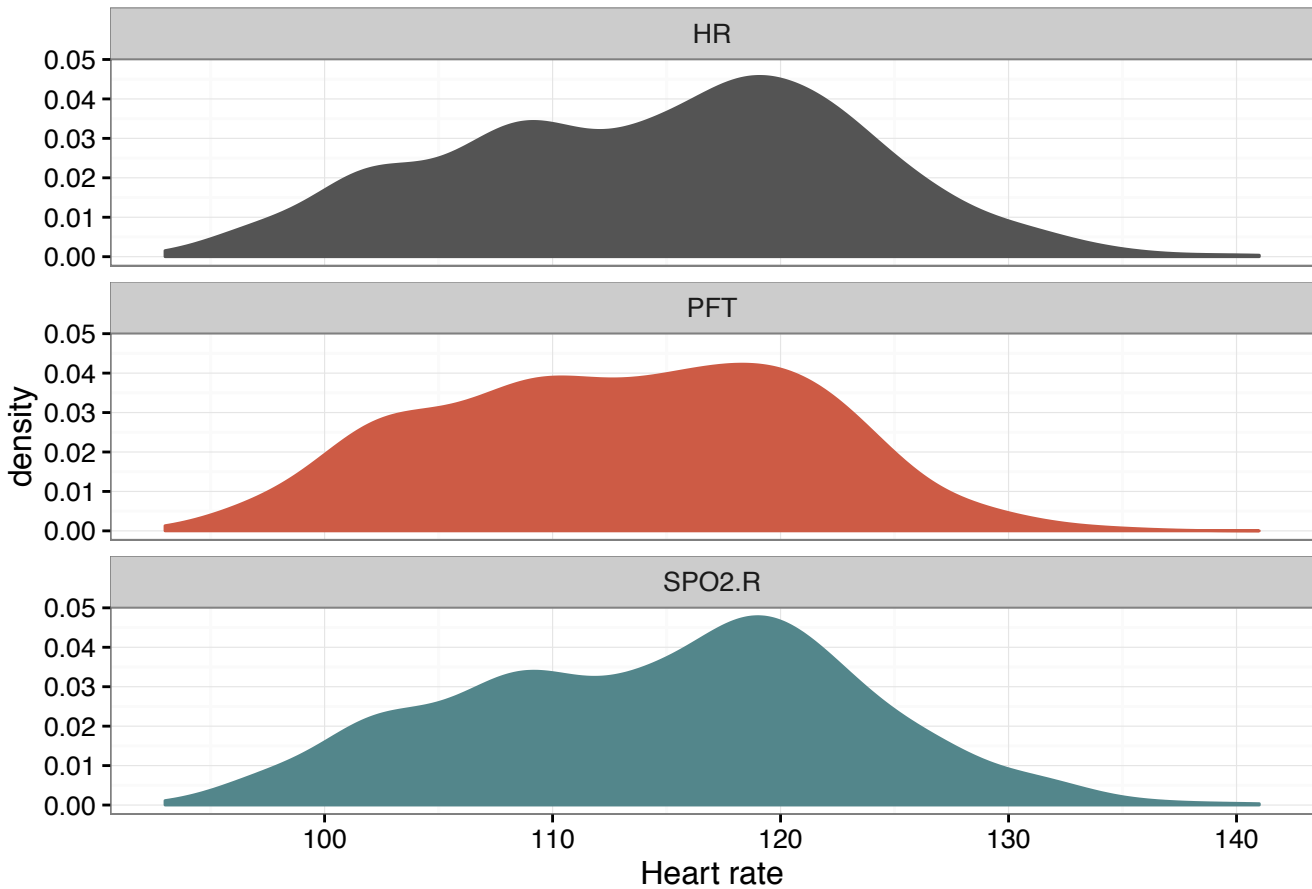

# W012

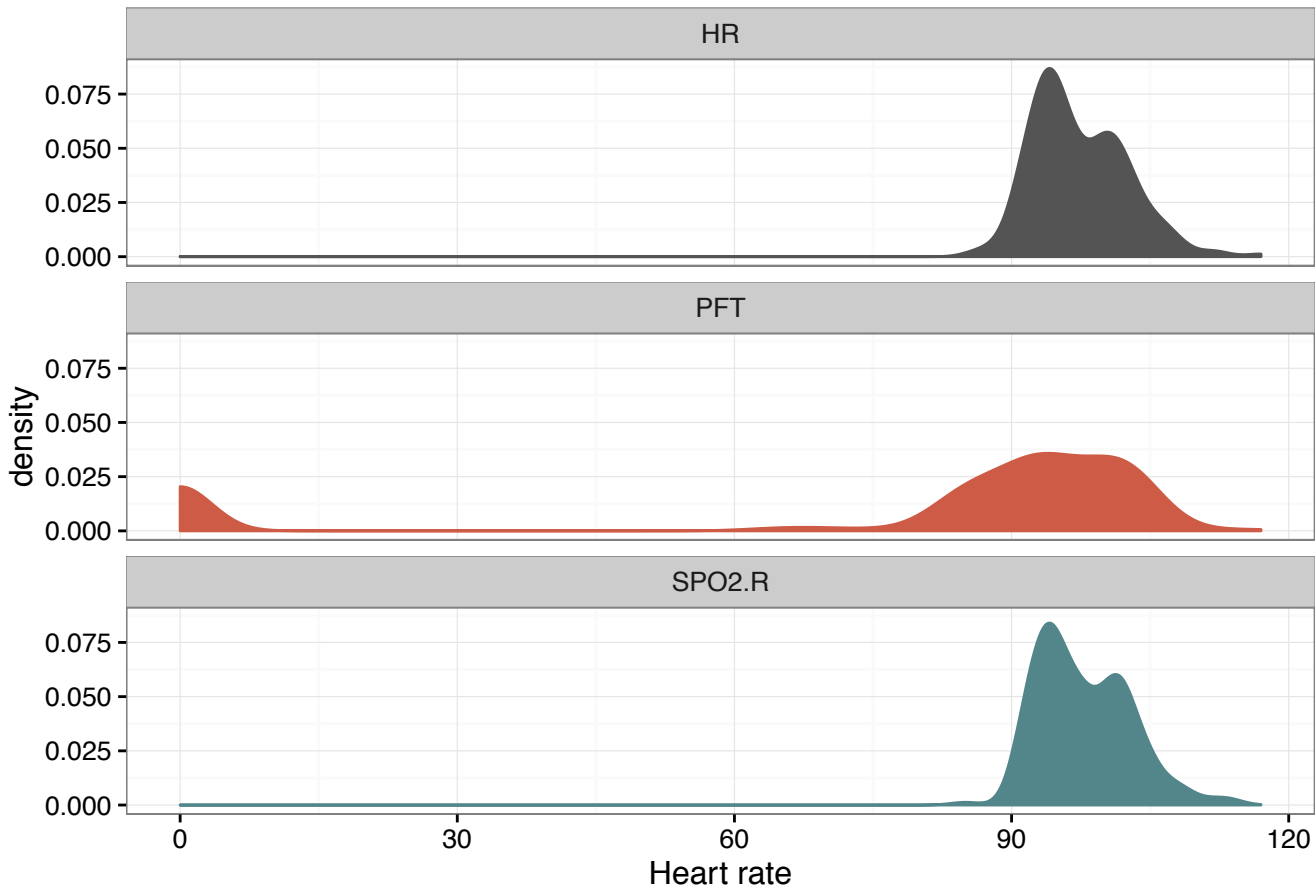

# W013

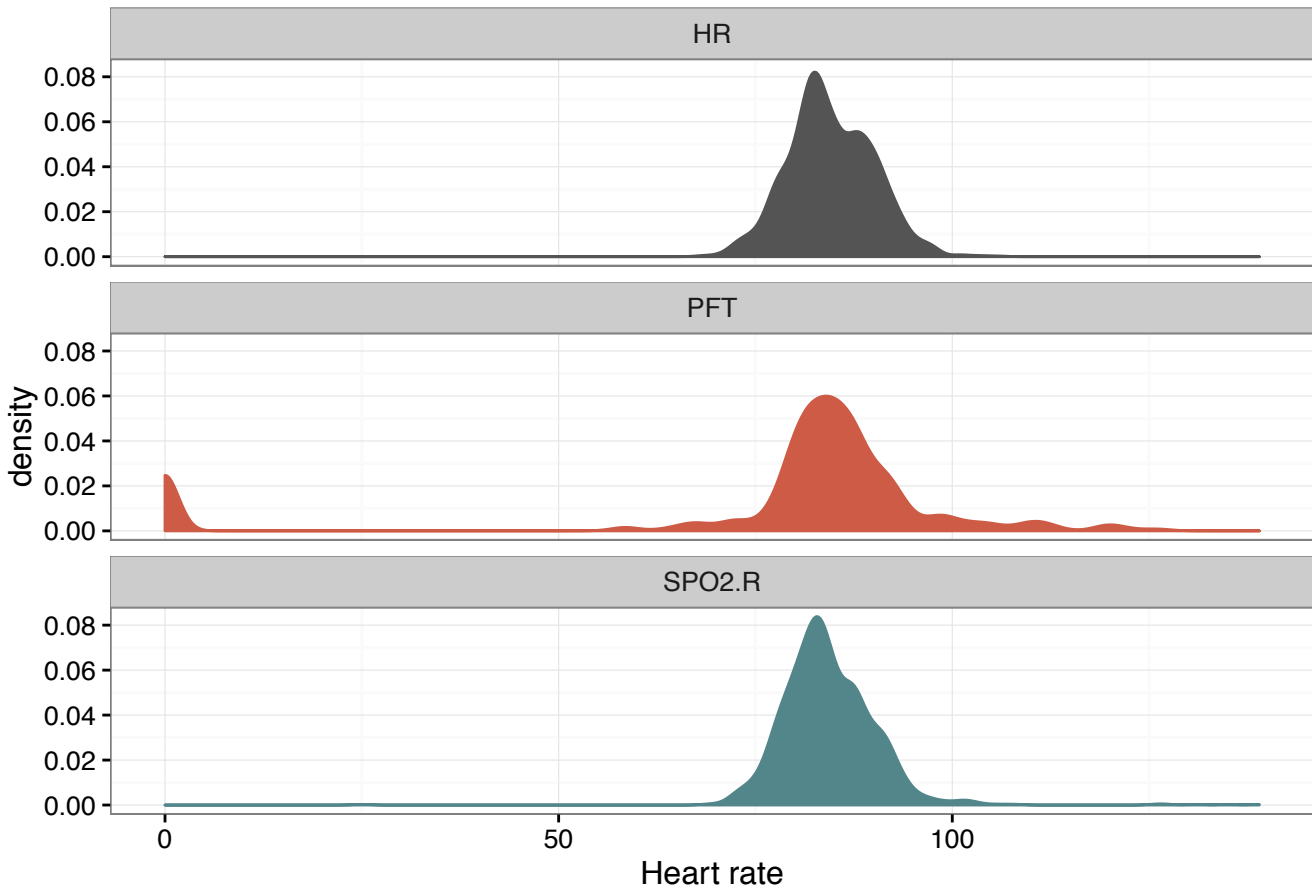

# W014

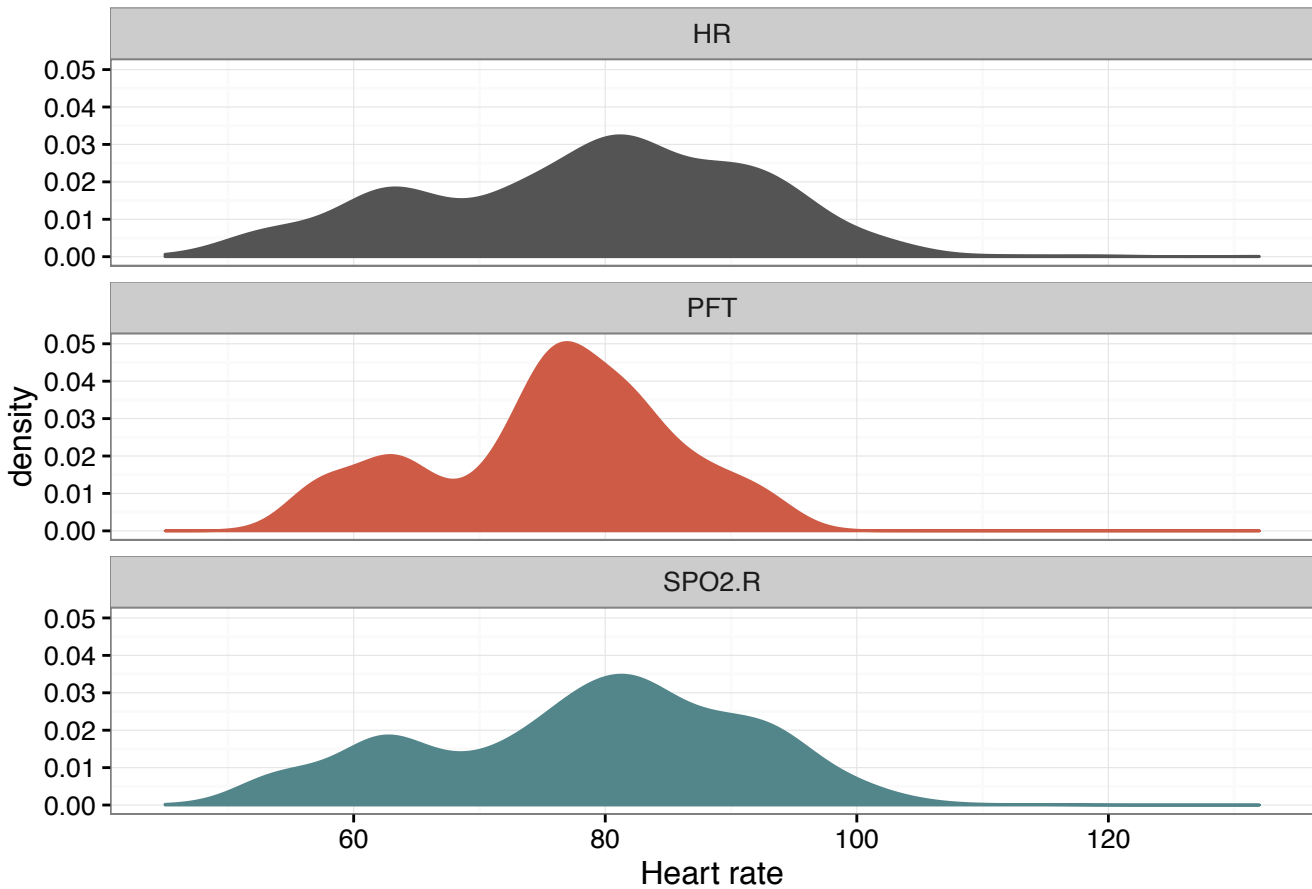

# W015

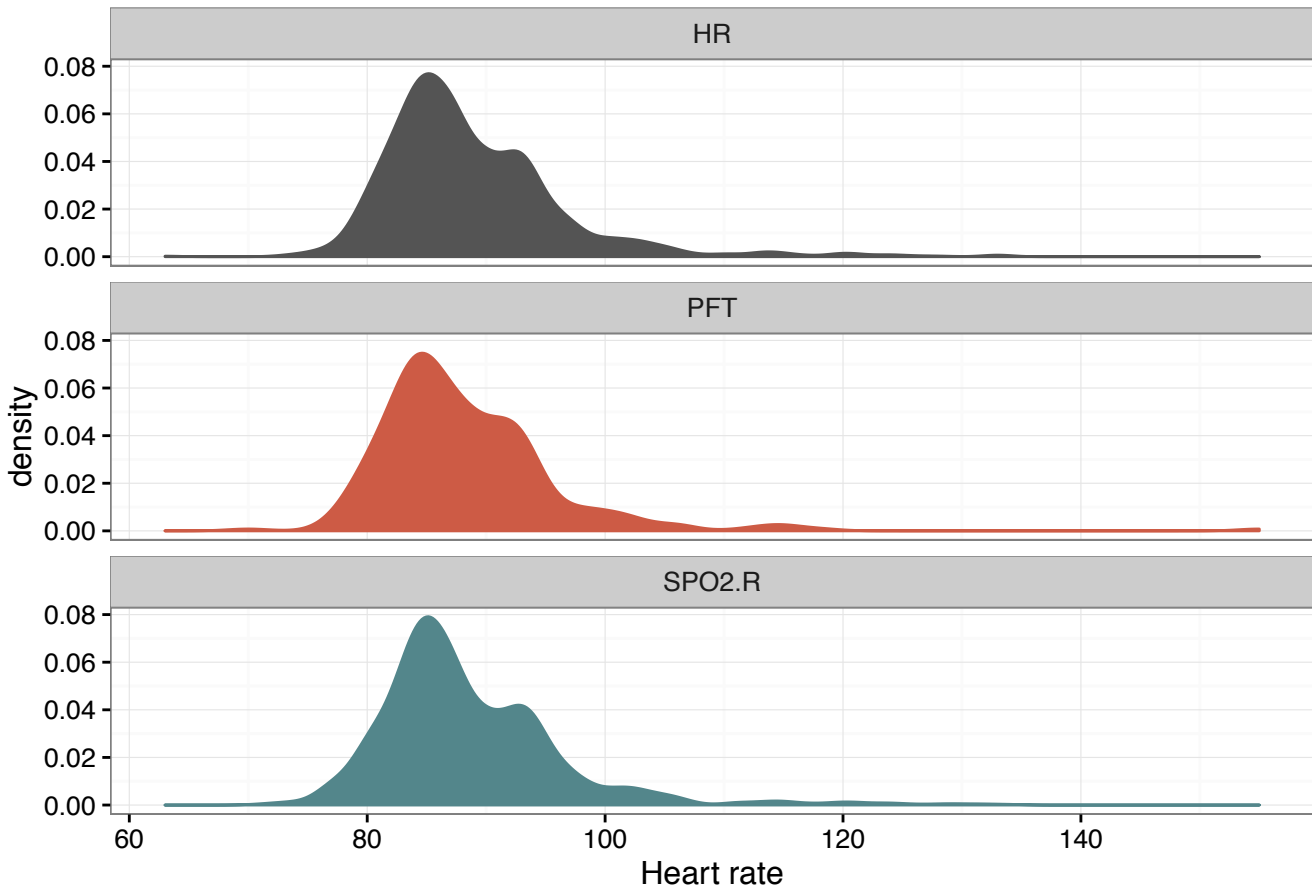

# W016

HR

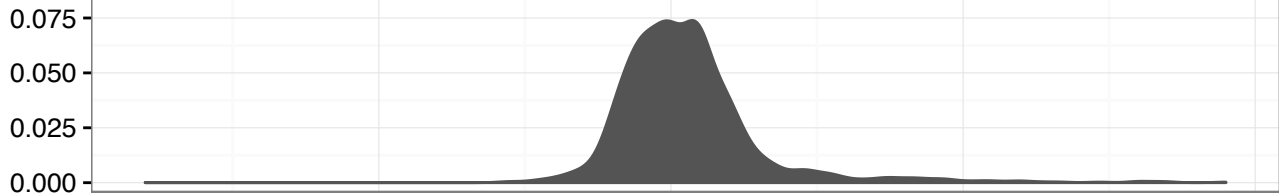

PFT

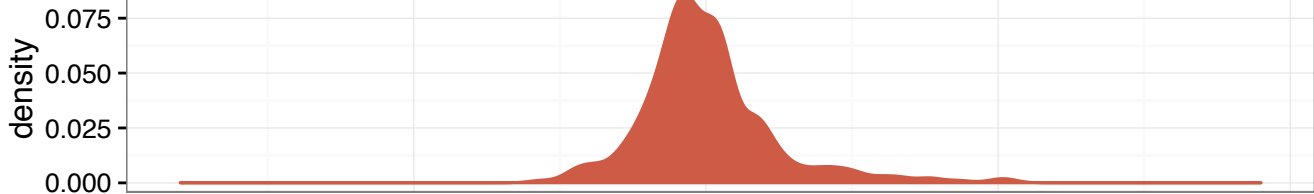

SPO2.R

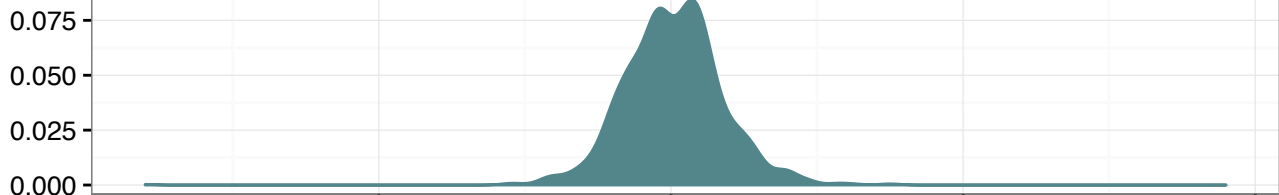

60

90

120

150

Heart rate

# W017

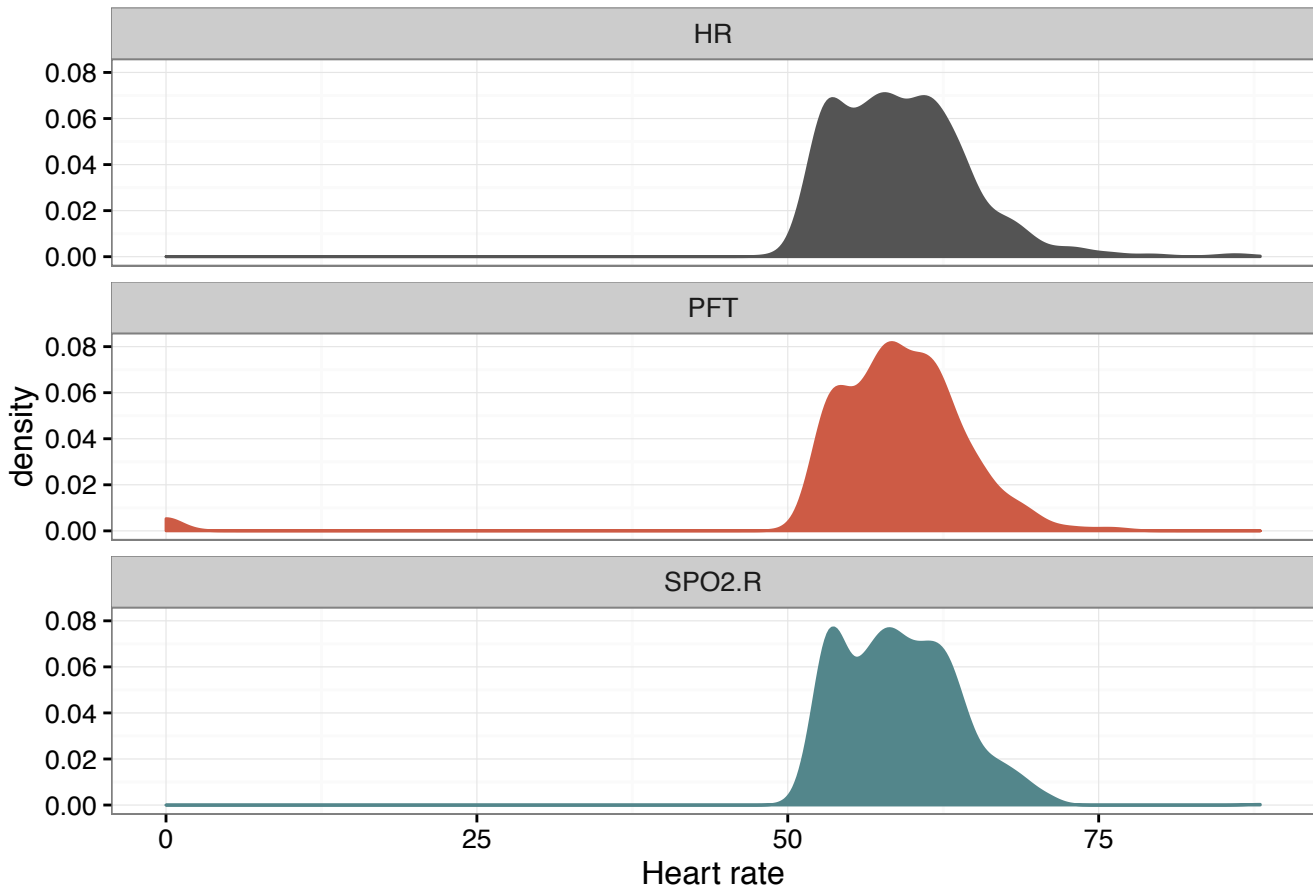

# W018

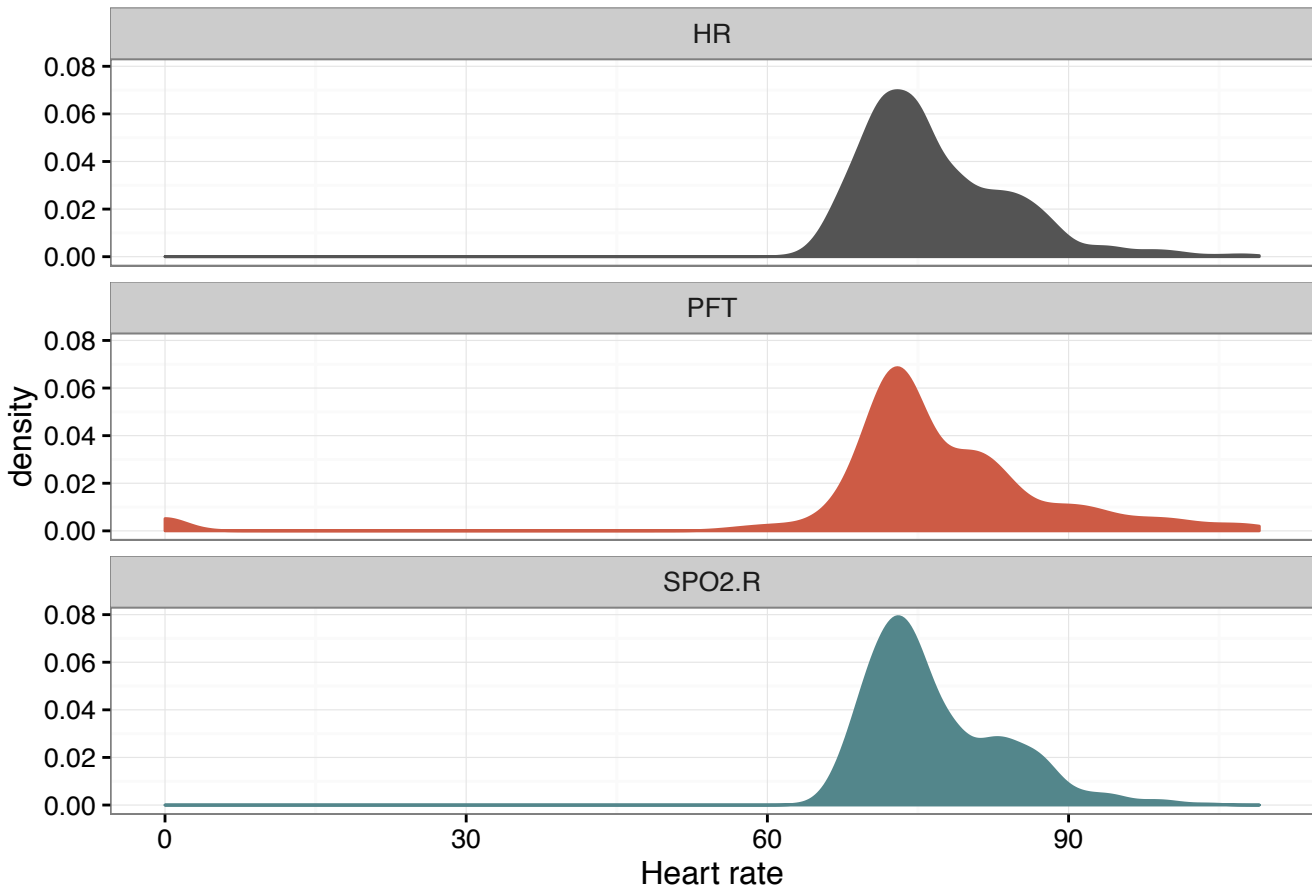



# W019

HR

0.075  
0.050  
0.025  
0.000

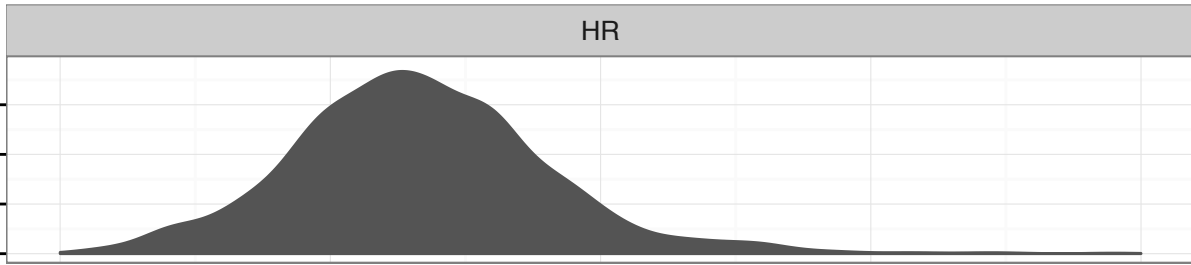

PFT

density

0.075  
0.050  
0.025  
0.000

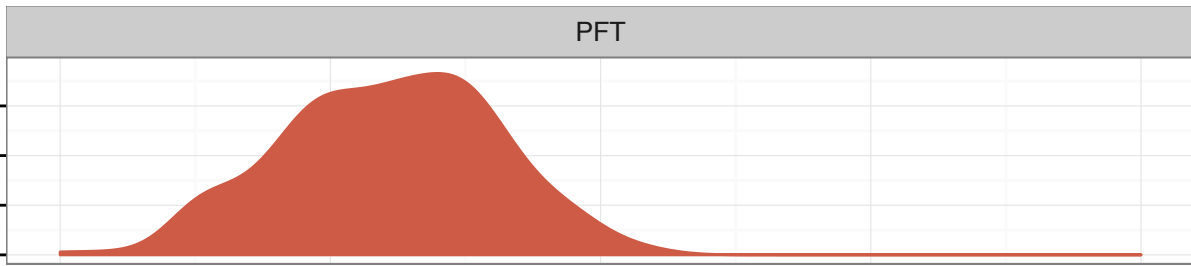

SPO2.R

0.075  
0.050  
0.025  
0.000

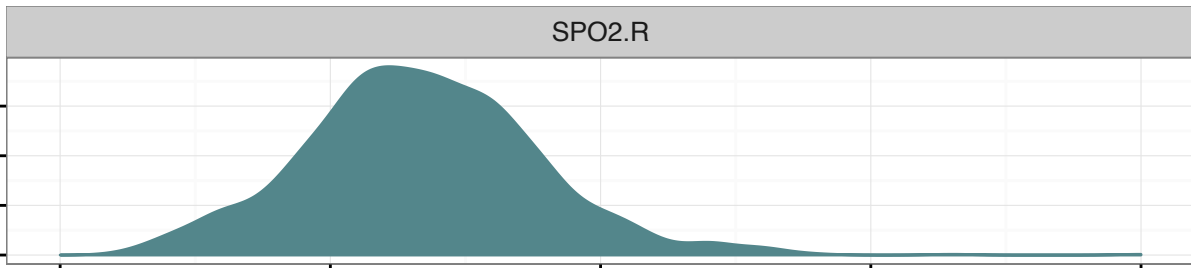

80

90

100

110

120

Heart rate

# W020

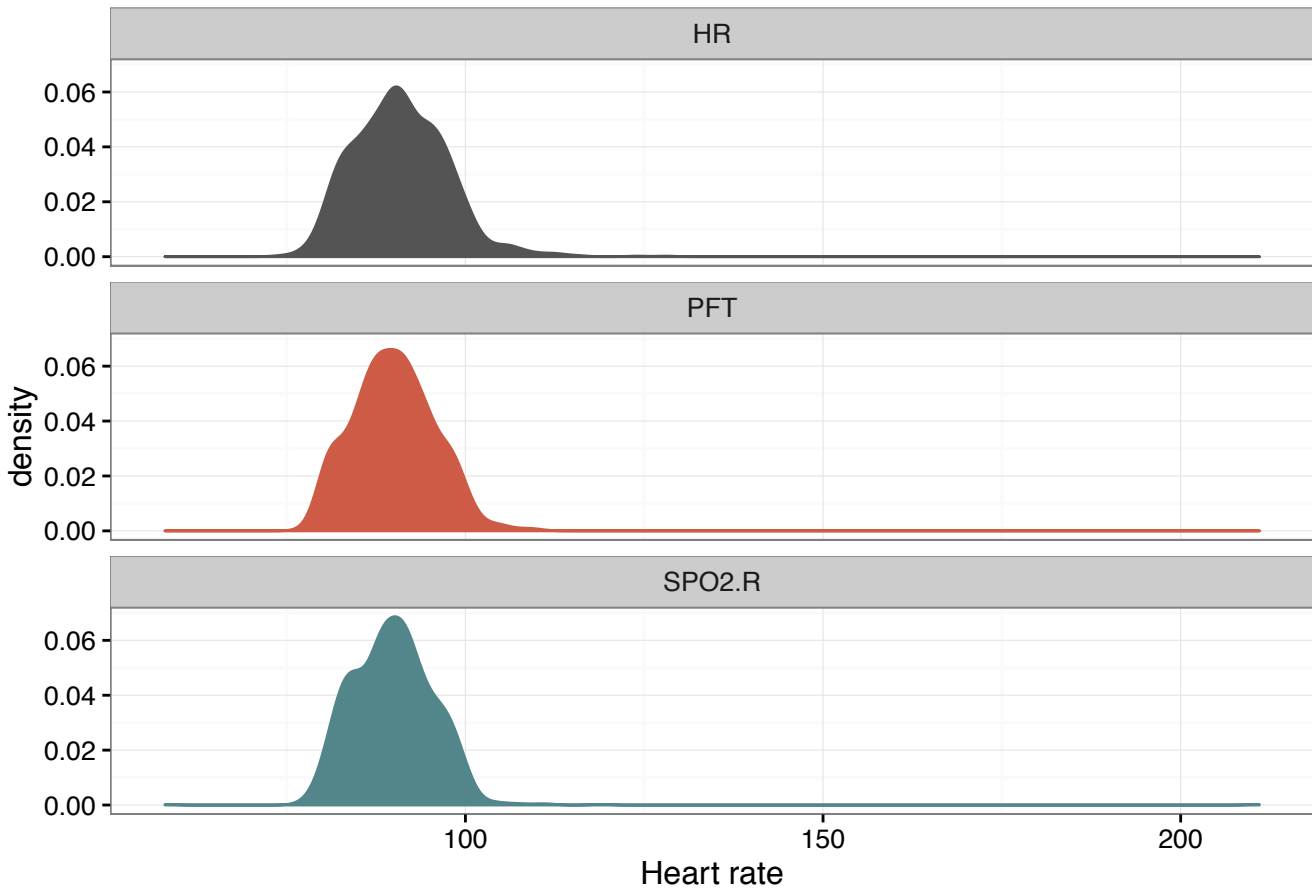

# W021

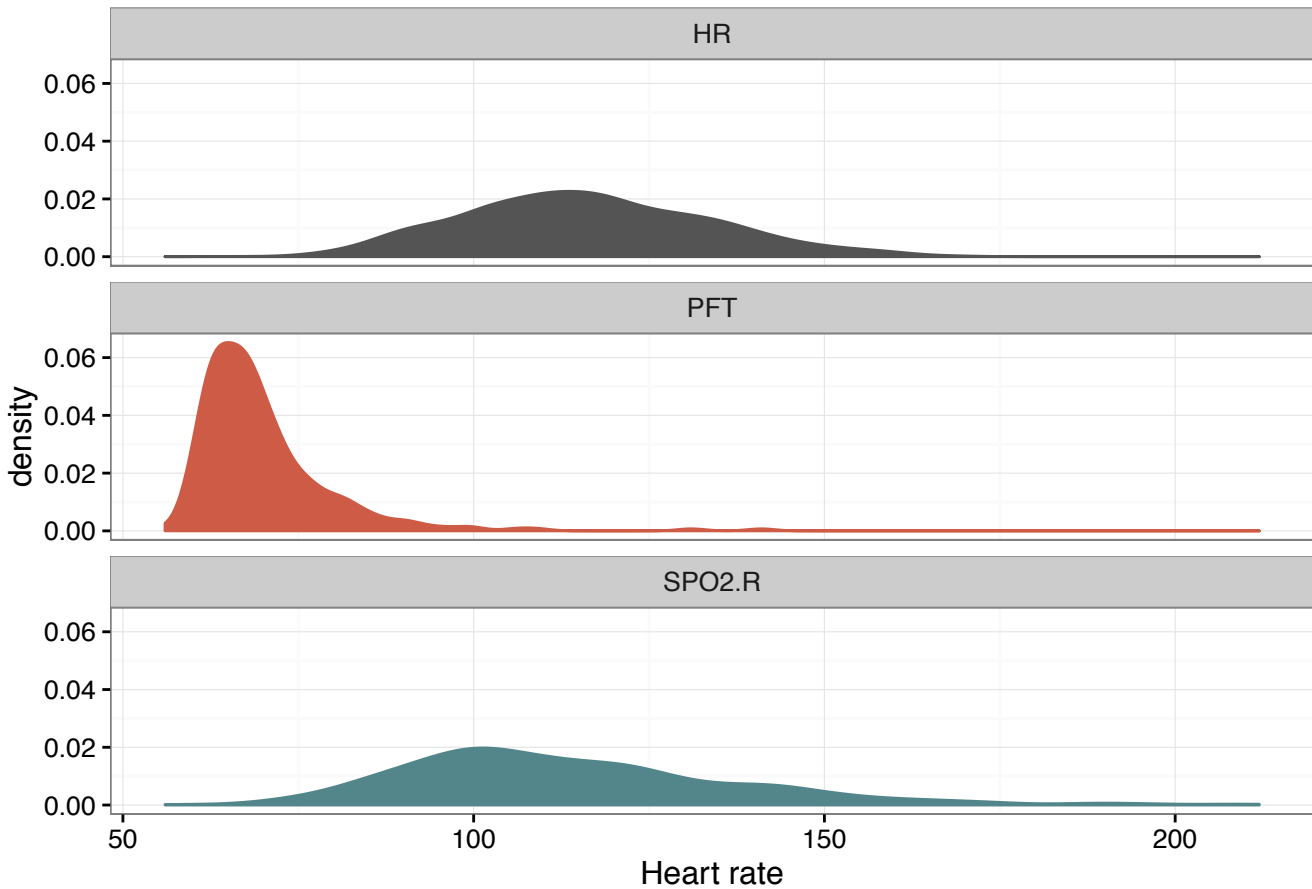

# W022

HR

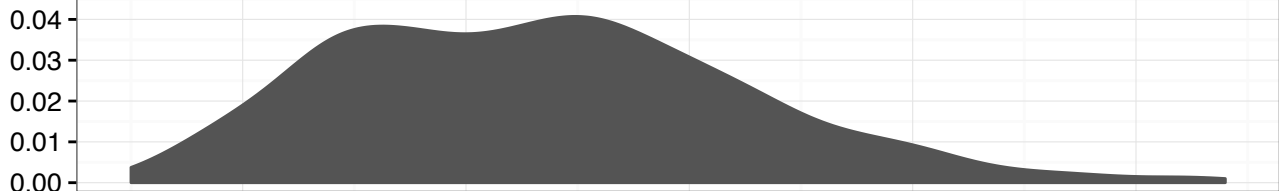

PFT

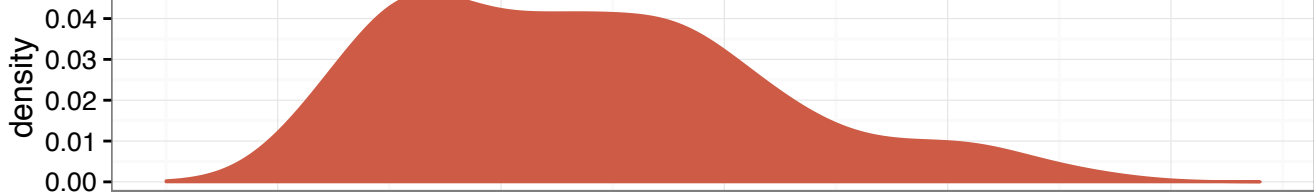

SPO2.R

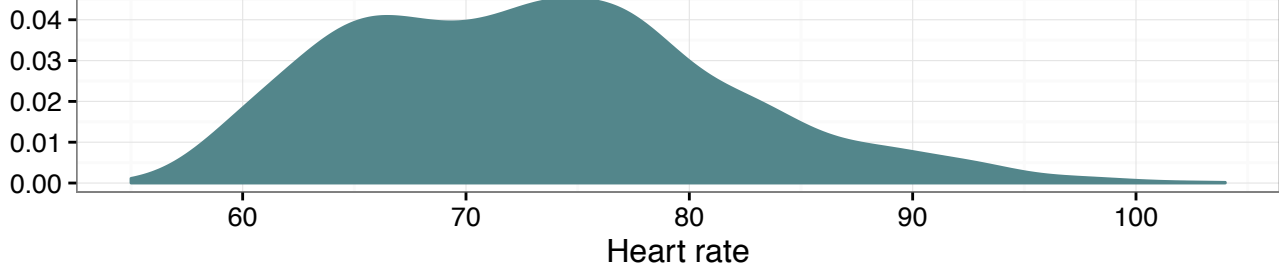

# W023

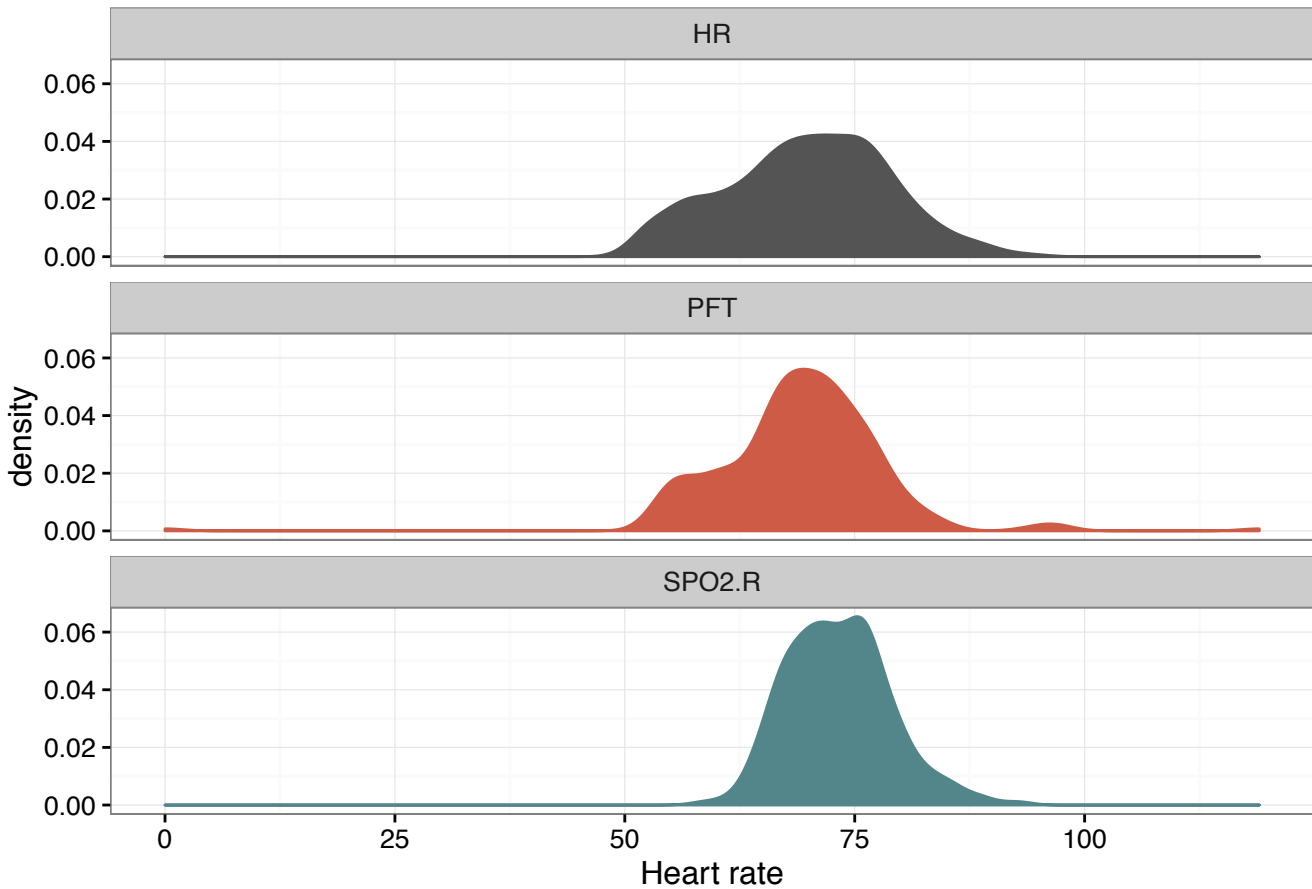

# W024

HR

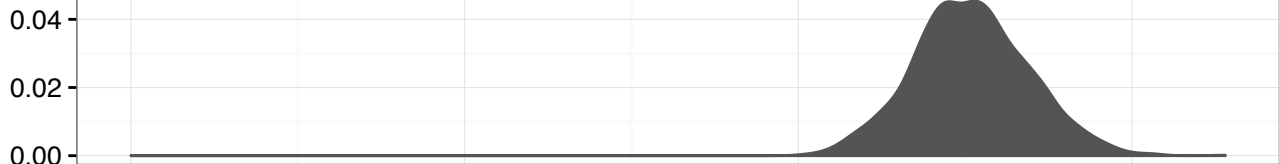

PFT

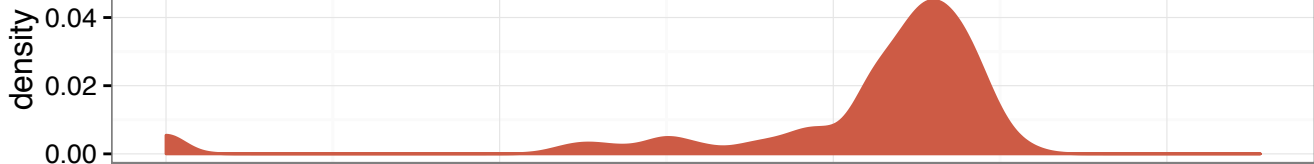

SPO2.R

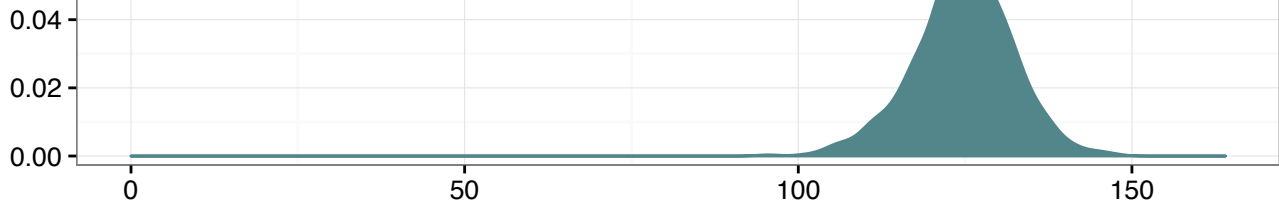

Heart rate

# W025

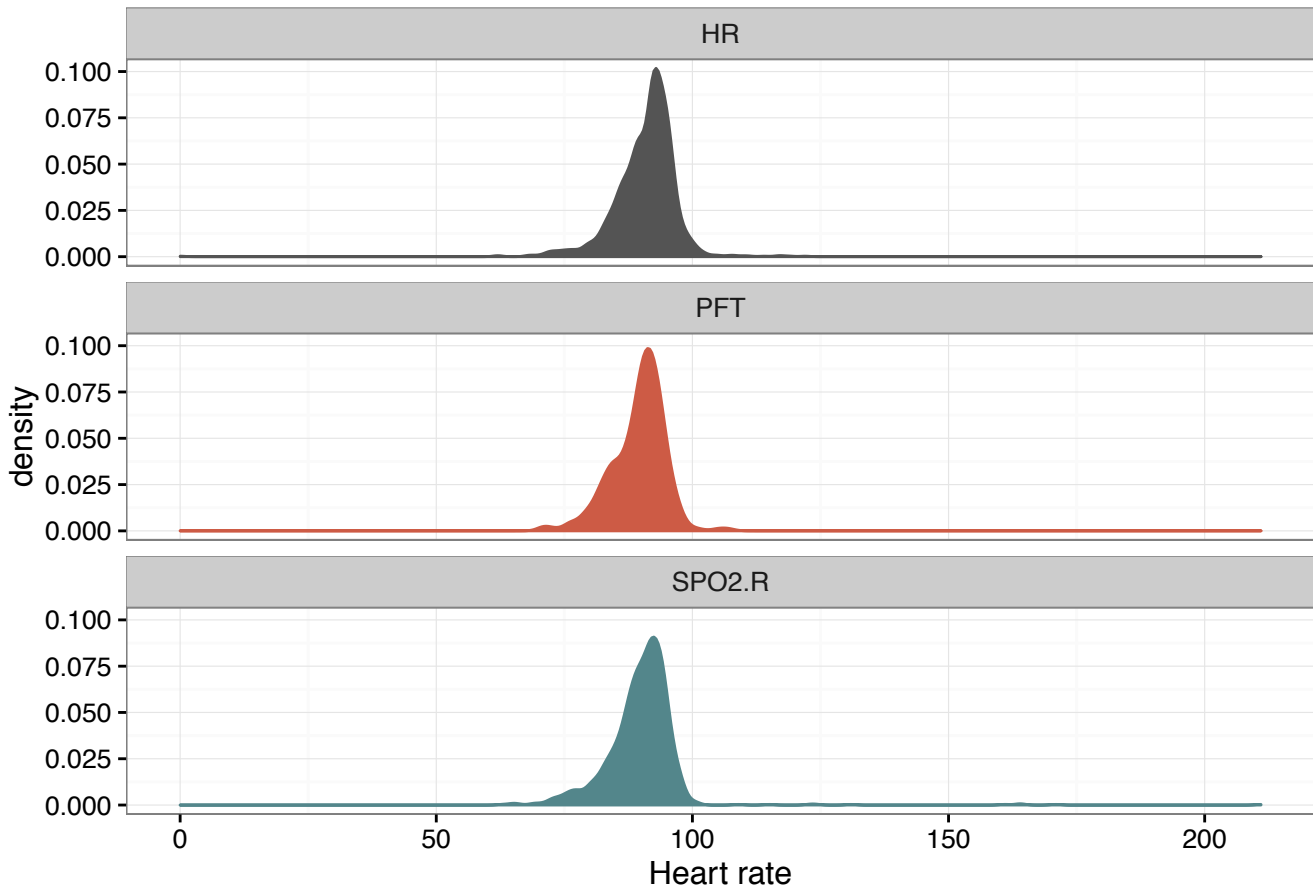

# W026

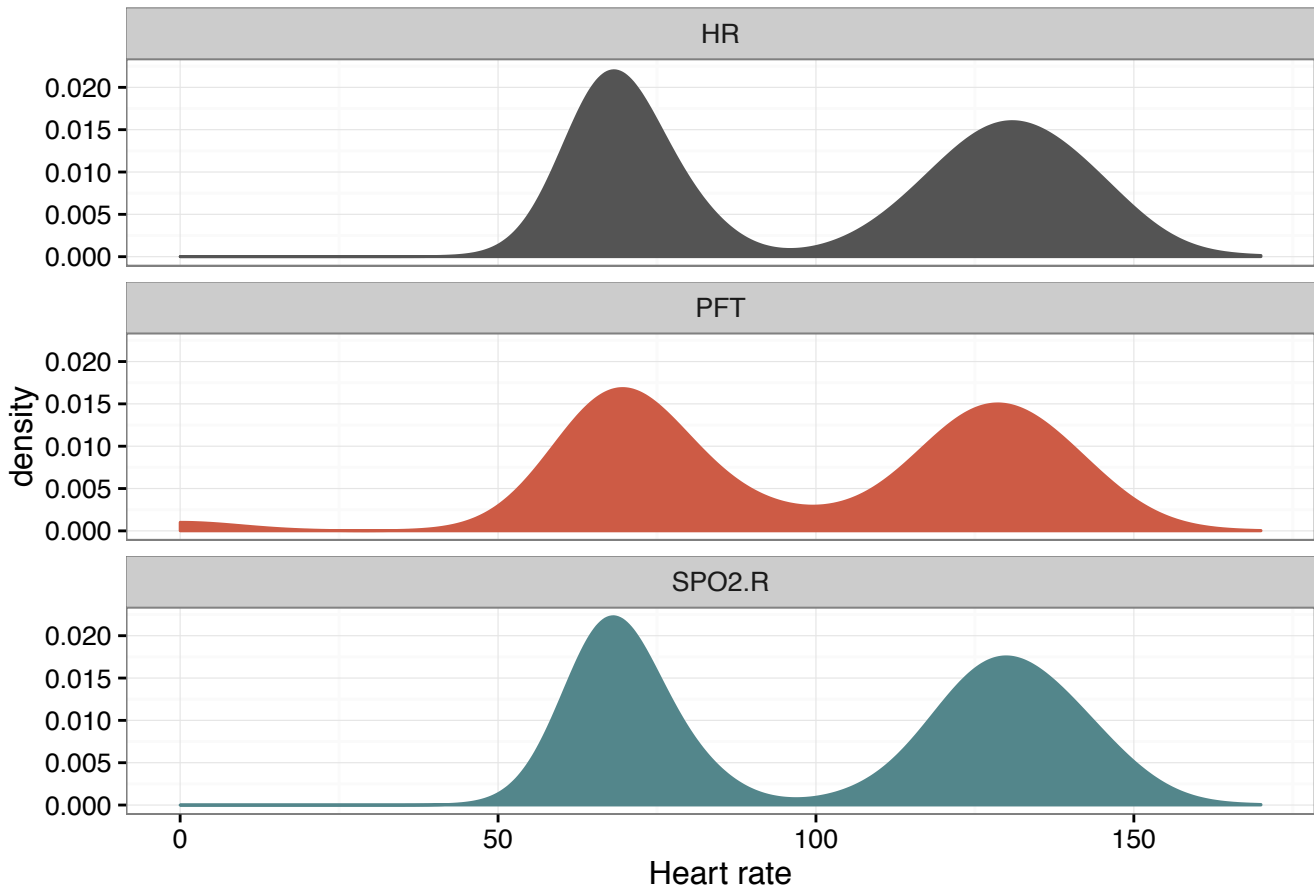



# W027

HR

0.04  
0.02  
0.00

PFT

density

0.04  
0.02  
0.00

SPO2.R

0.04  
0.02  
0.00

0

50

Heart rate

150

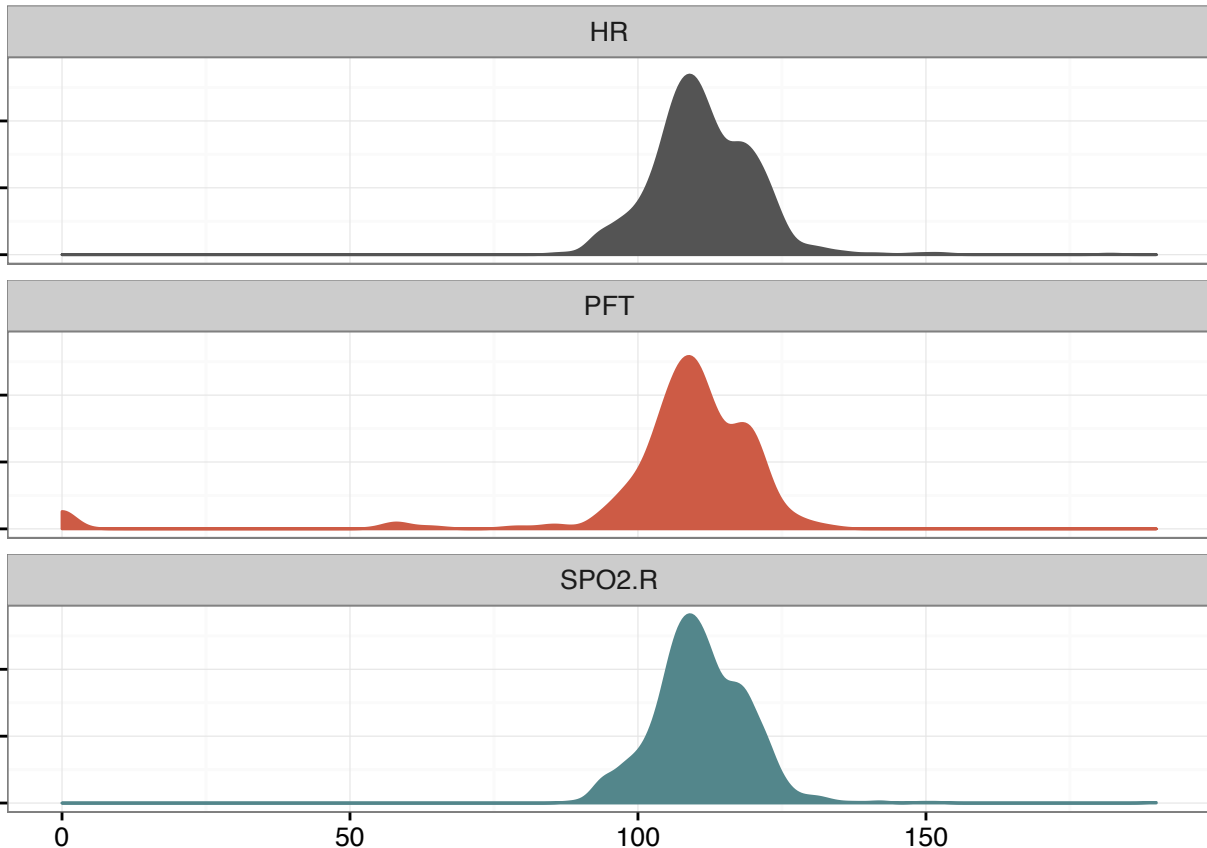

# W028

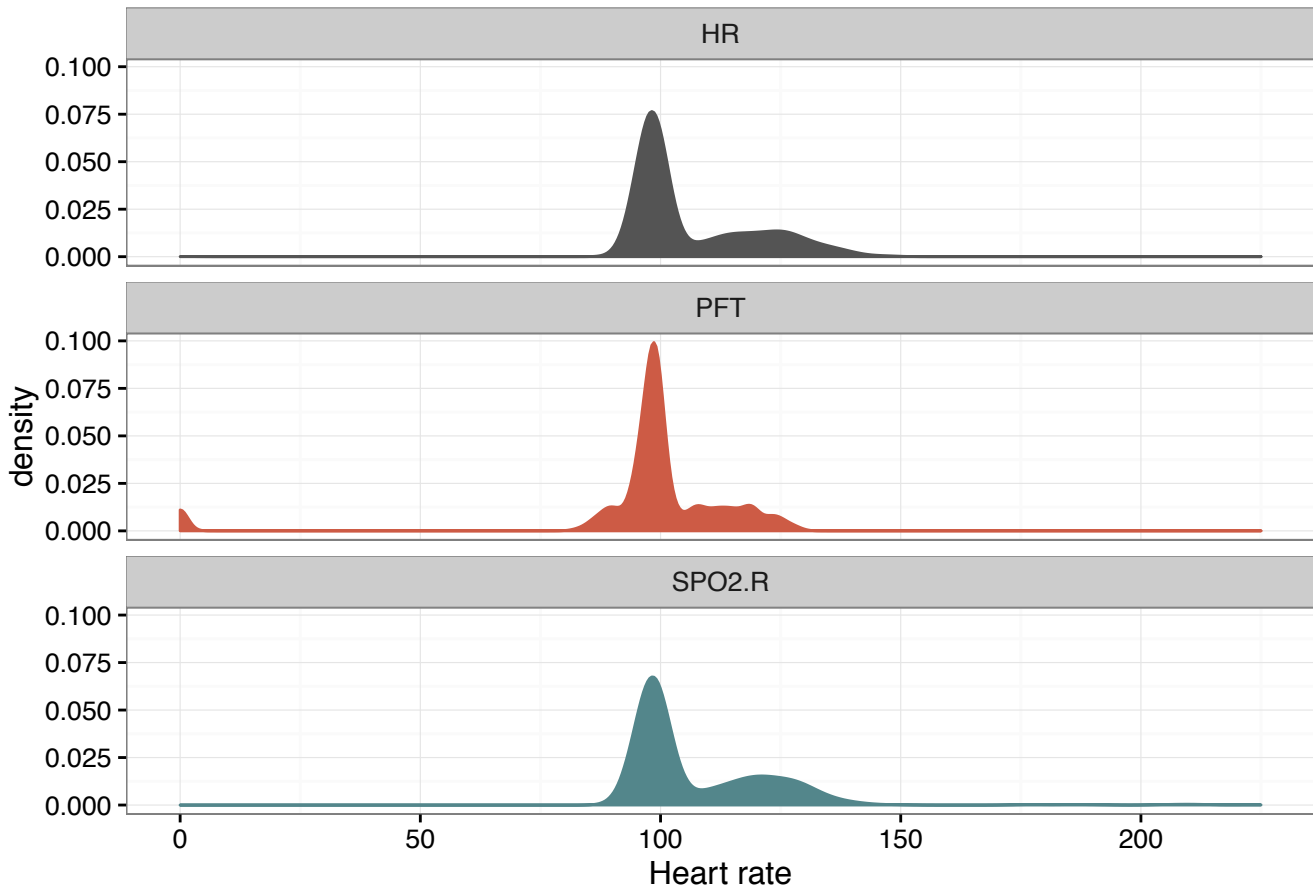

# W029

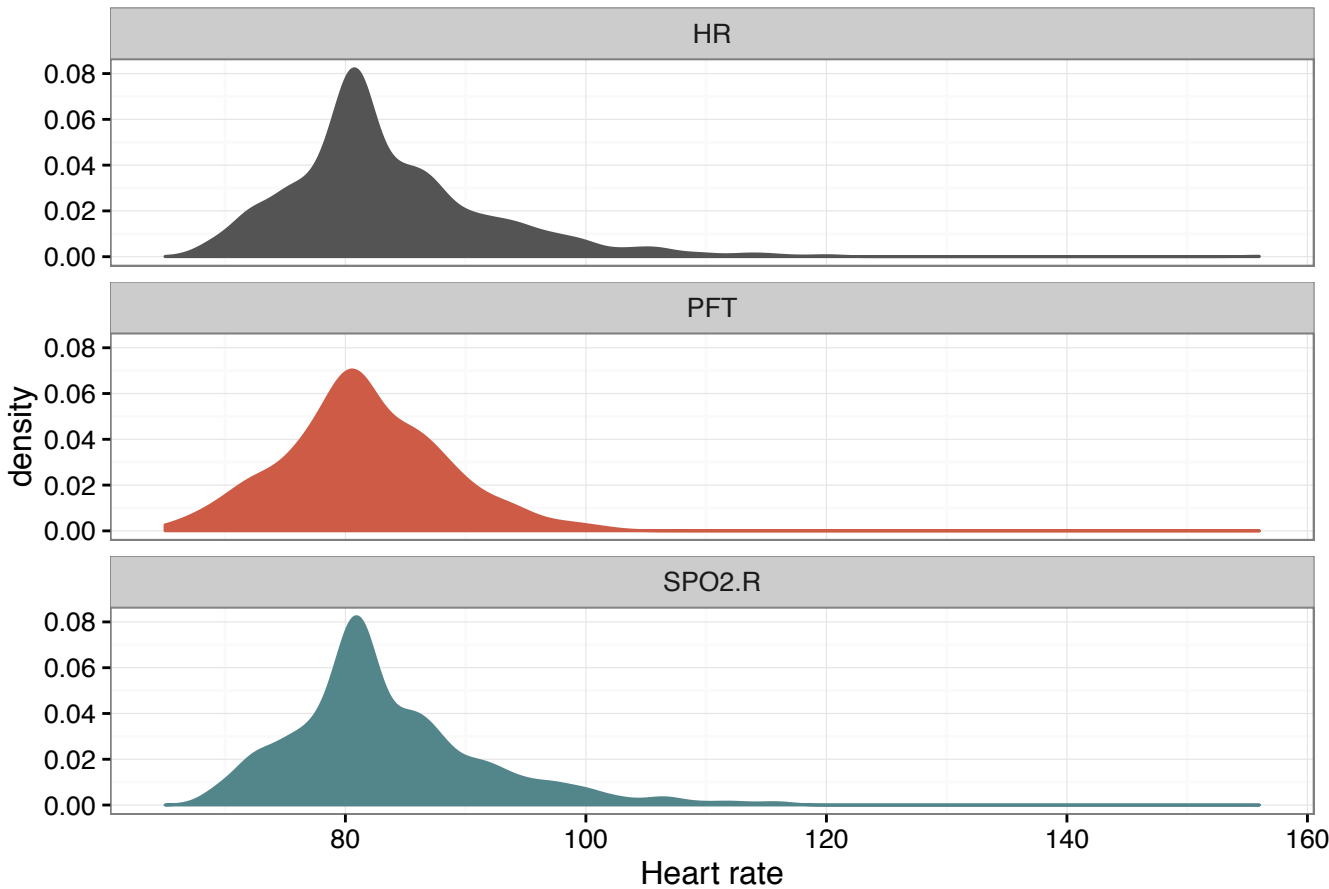

# W030

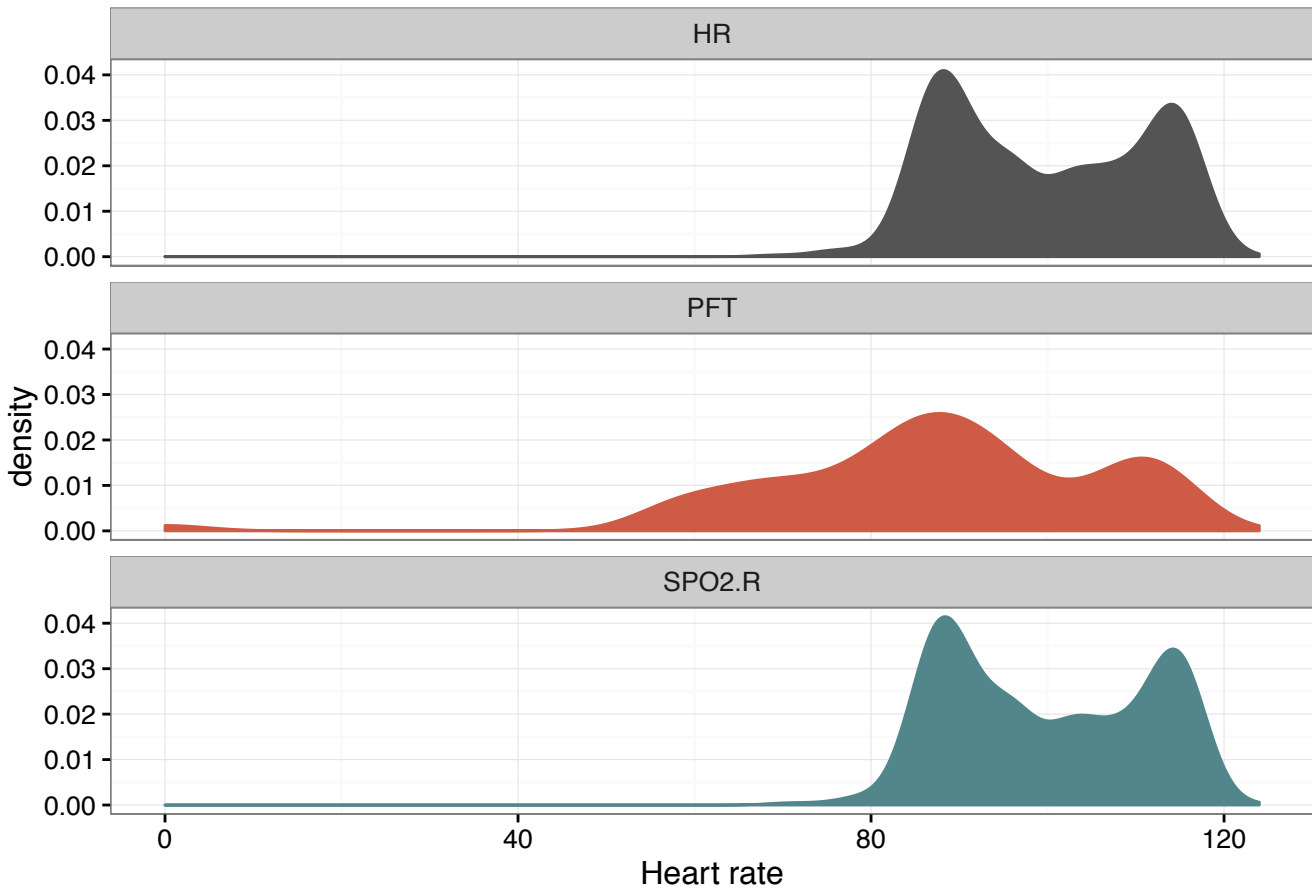

# W031

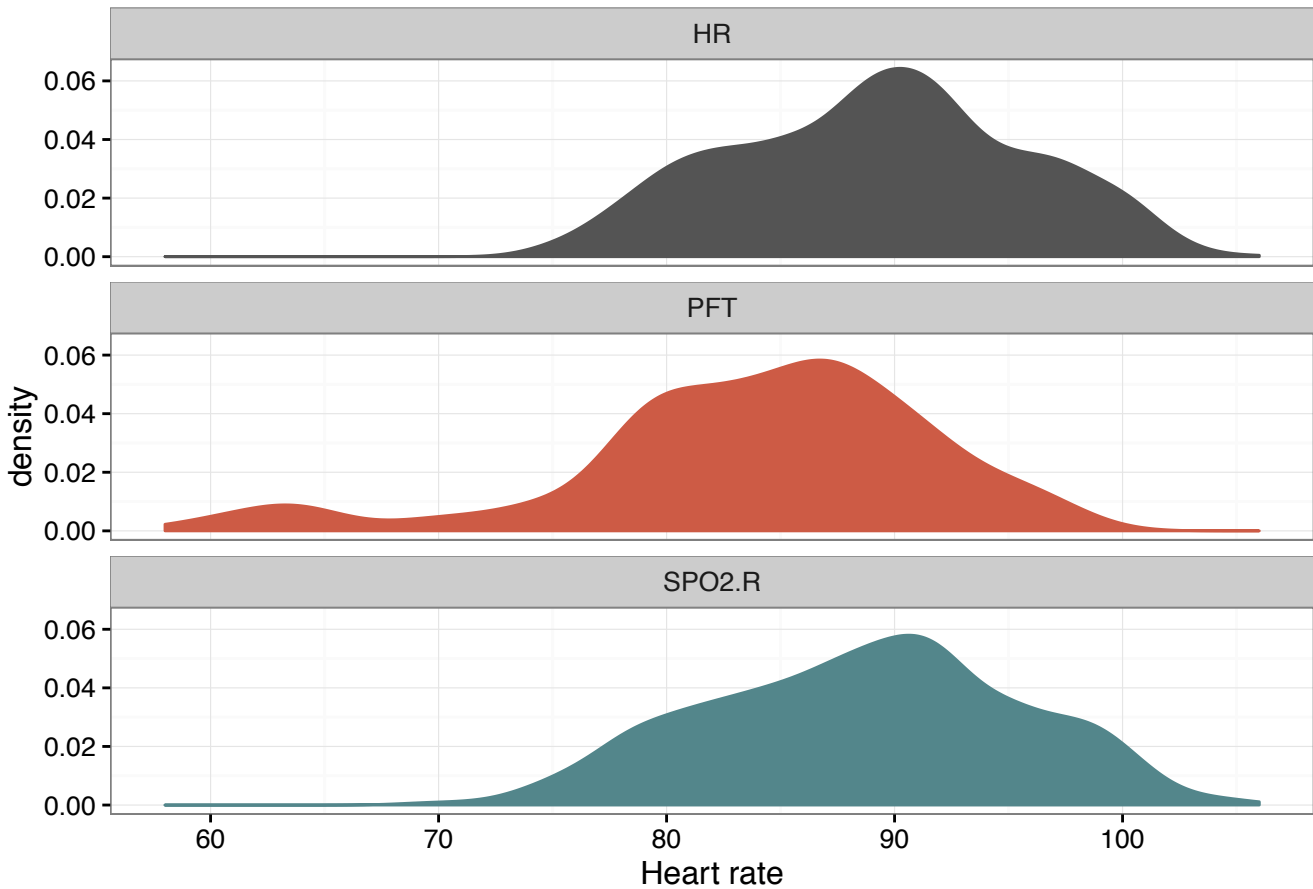

# W032

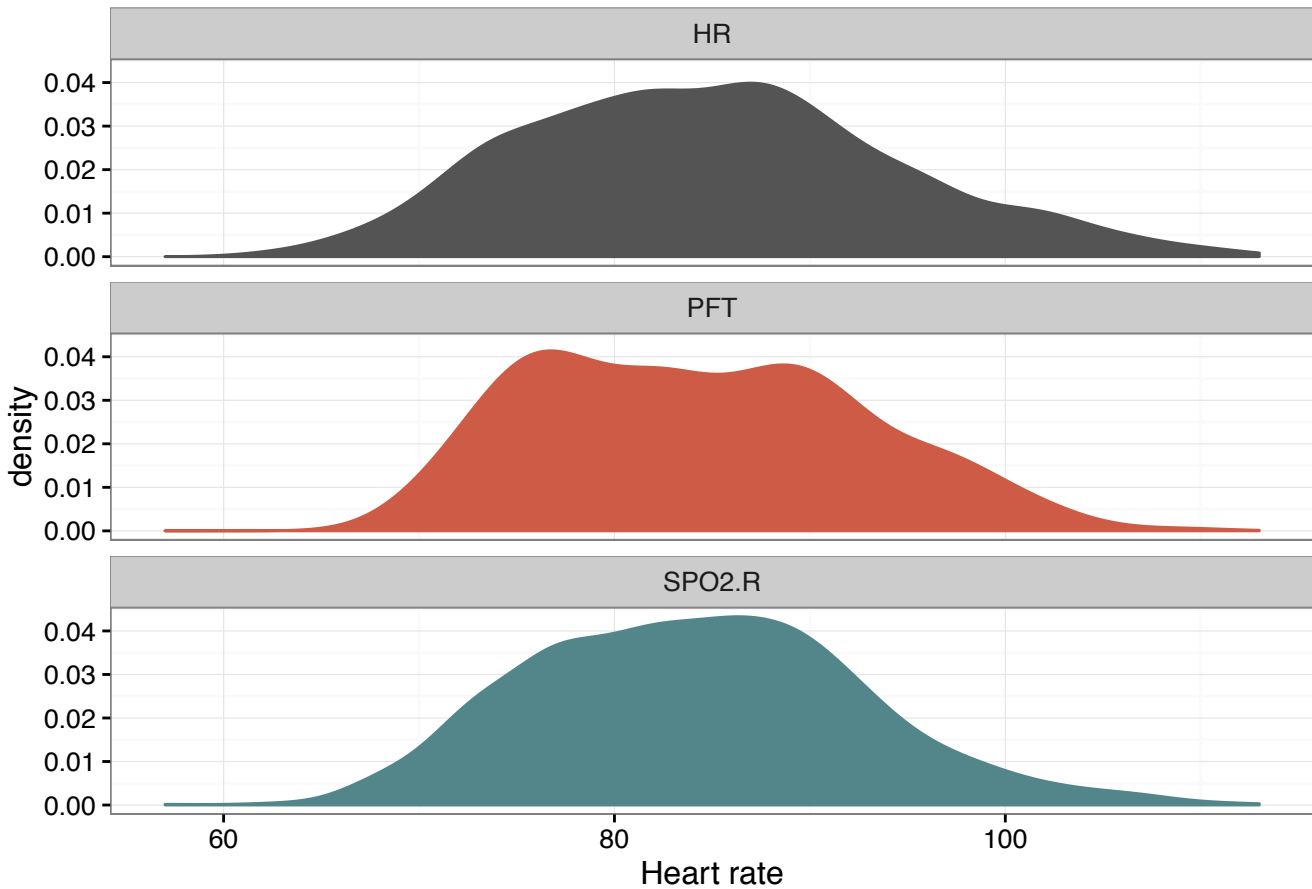

# W033

HR

0.10  
0.05  
0.00

PFT

density

0.10  
0.05  
0.00

SPO2.R

0.10  
0.05  
0.00

0

40

80

120

Heart rate

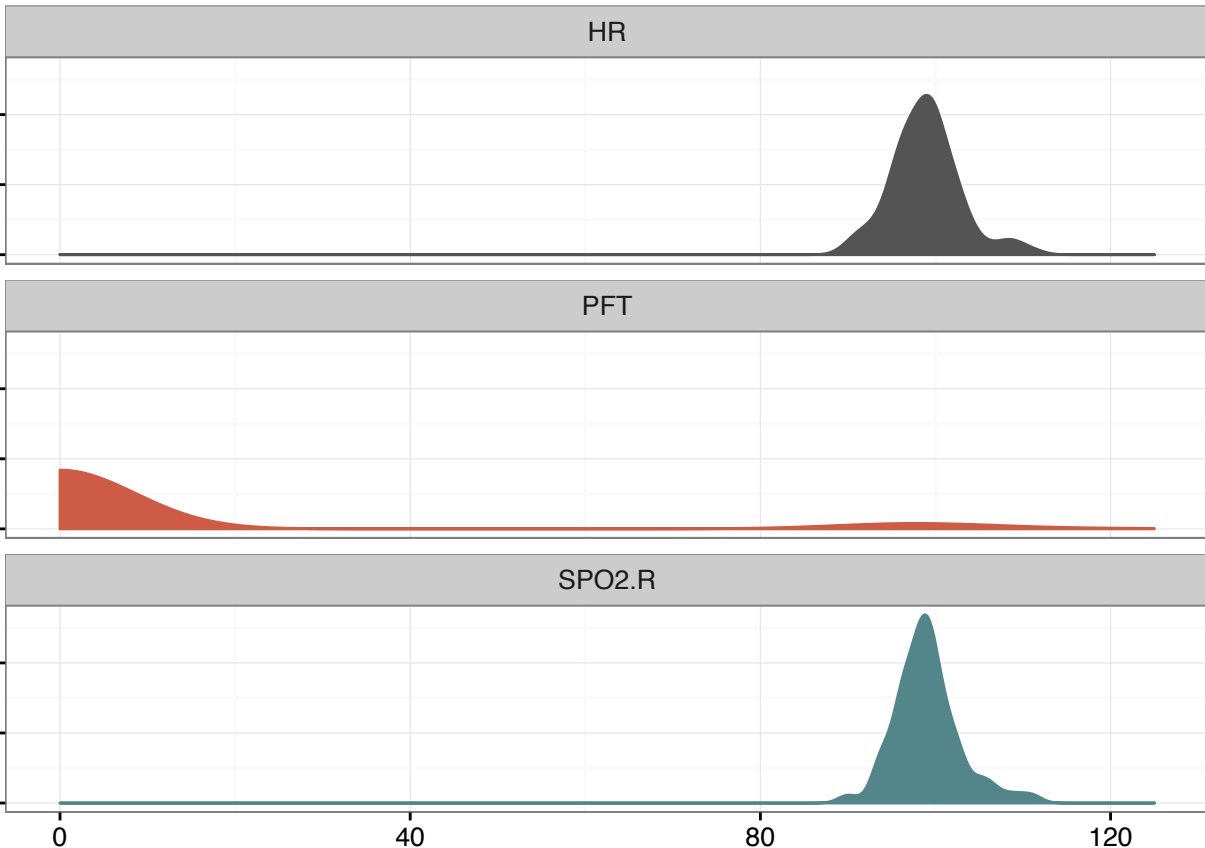

# W034

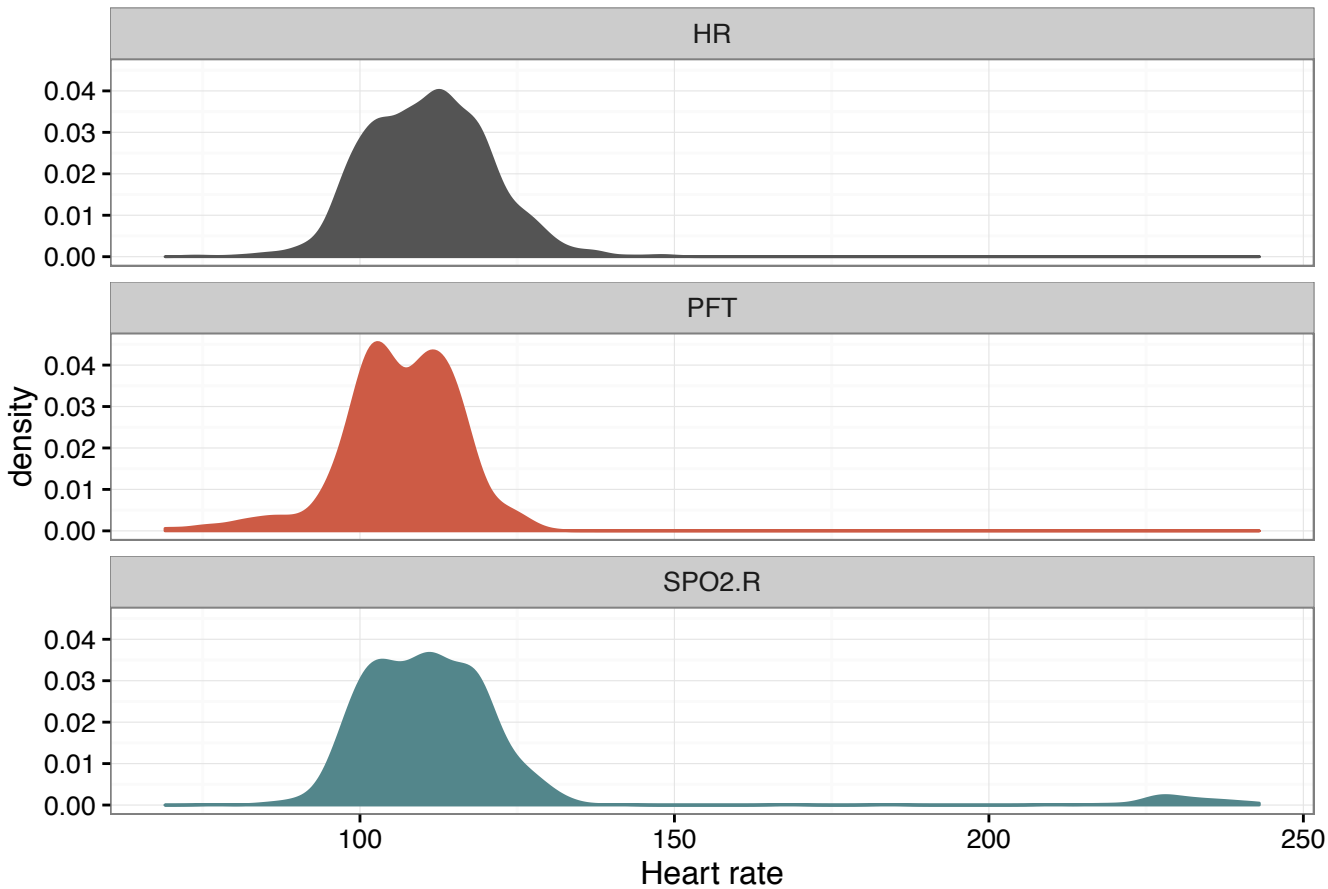



# W035

HR

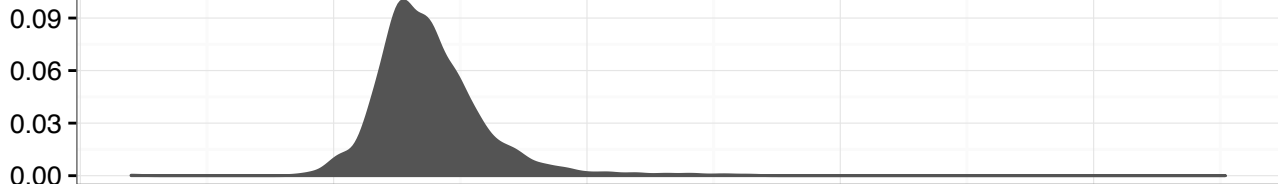

PFT

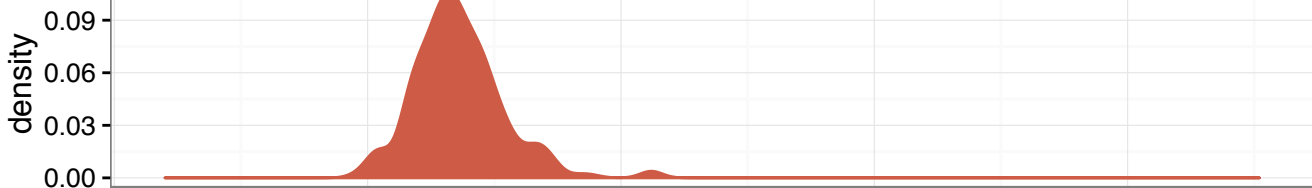

SPO2.R

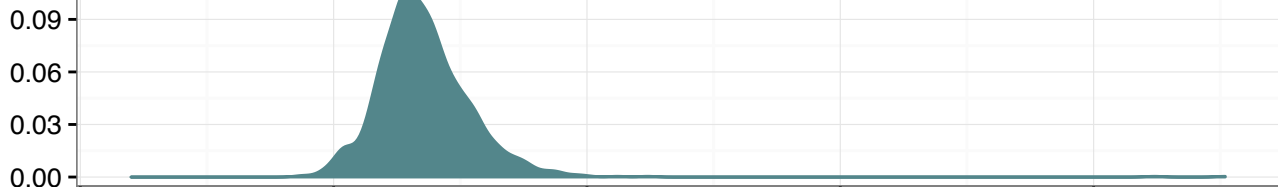

50

75

100

125

150

Heart rate

# W036

HR

0.3  
0.2  
0.1  
0.0

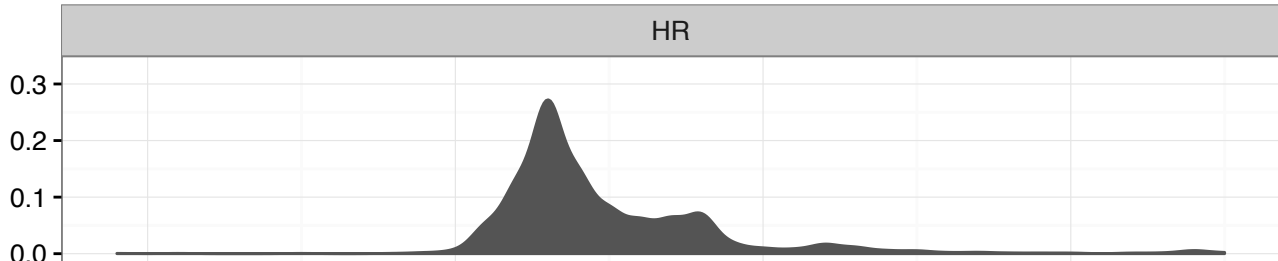

PFT

0.3  
0.2  
0.1  
0.0

density

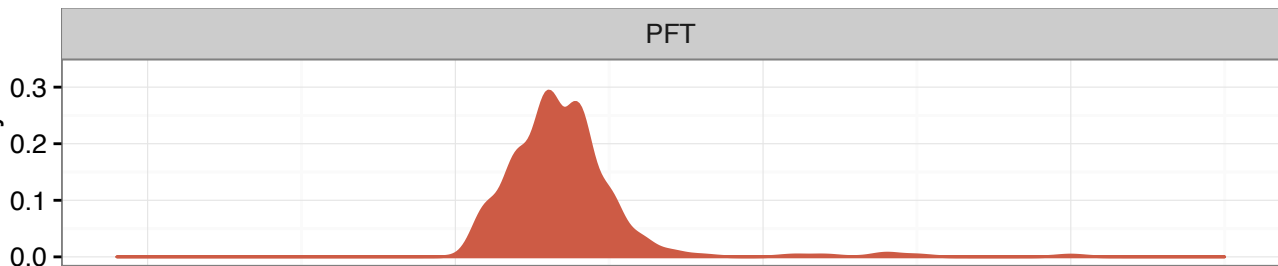

SPO2.R

0.3  
0.2  
0.1  
0.0

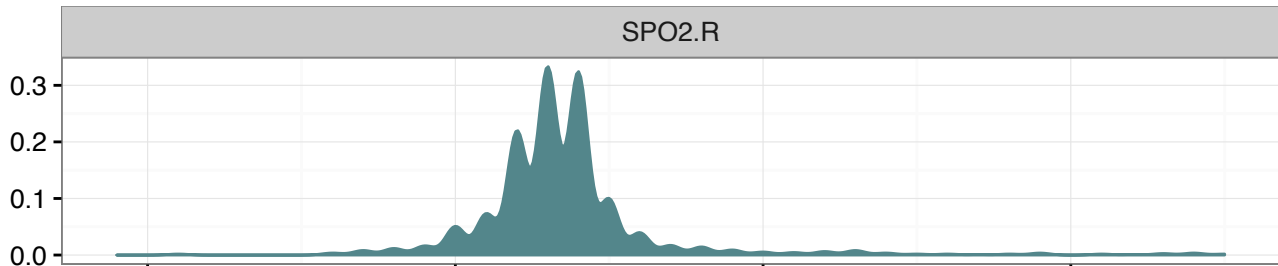

50

60

70

80

Heart rate

# W037

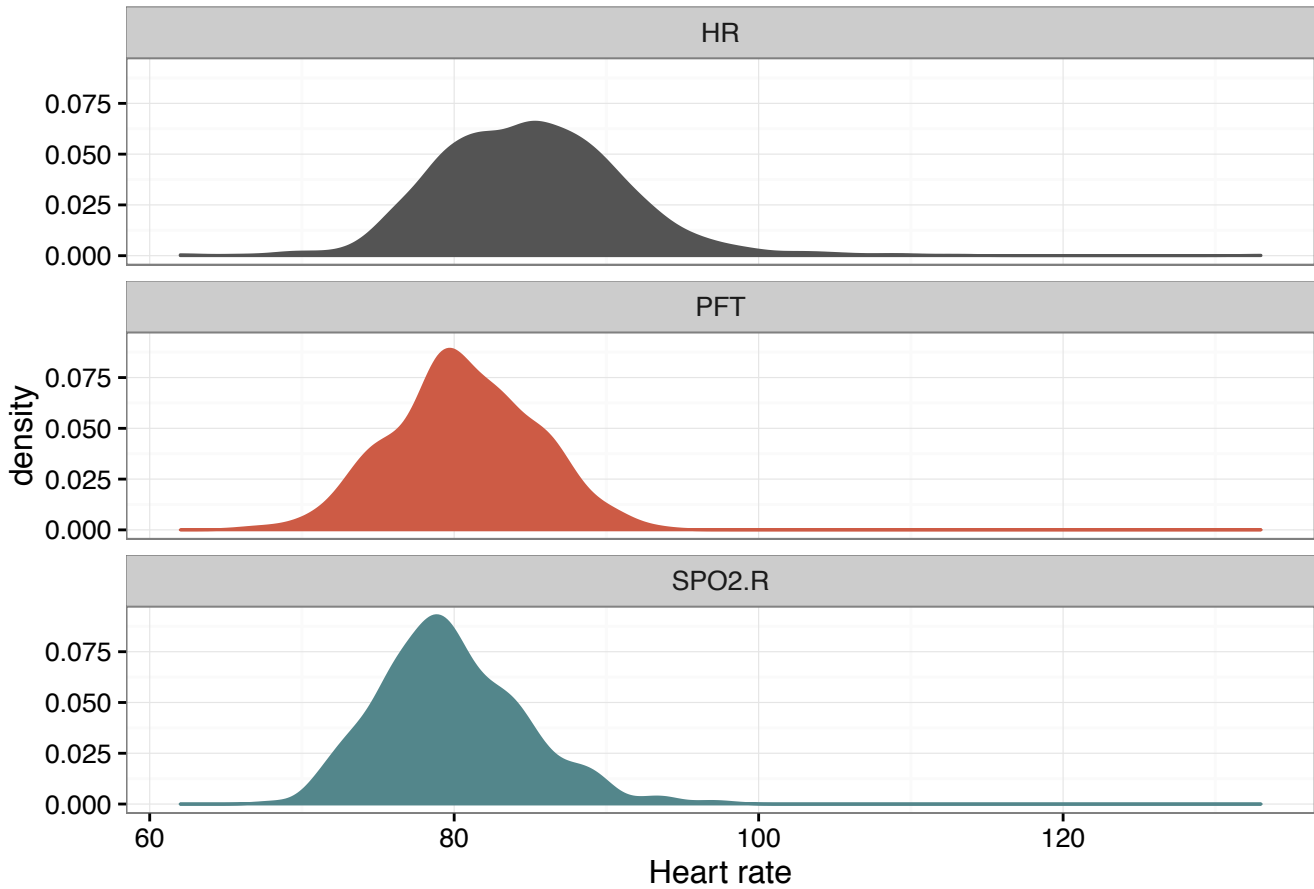

# W038

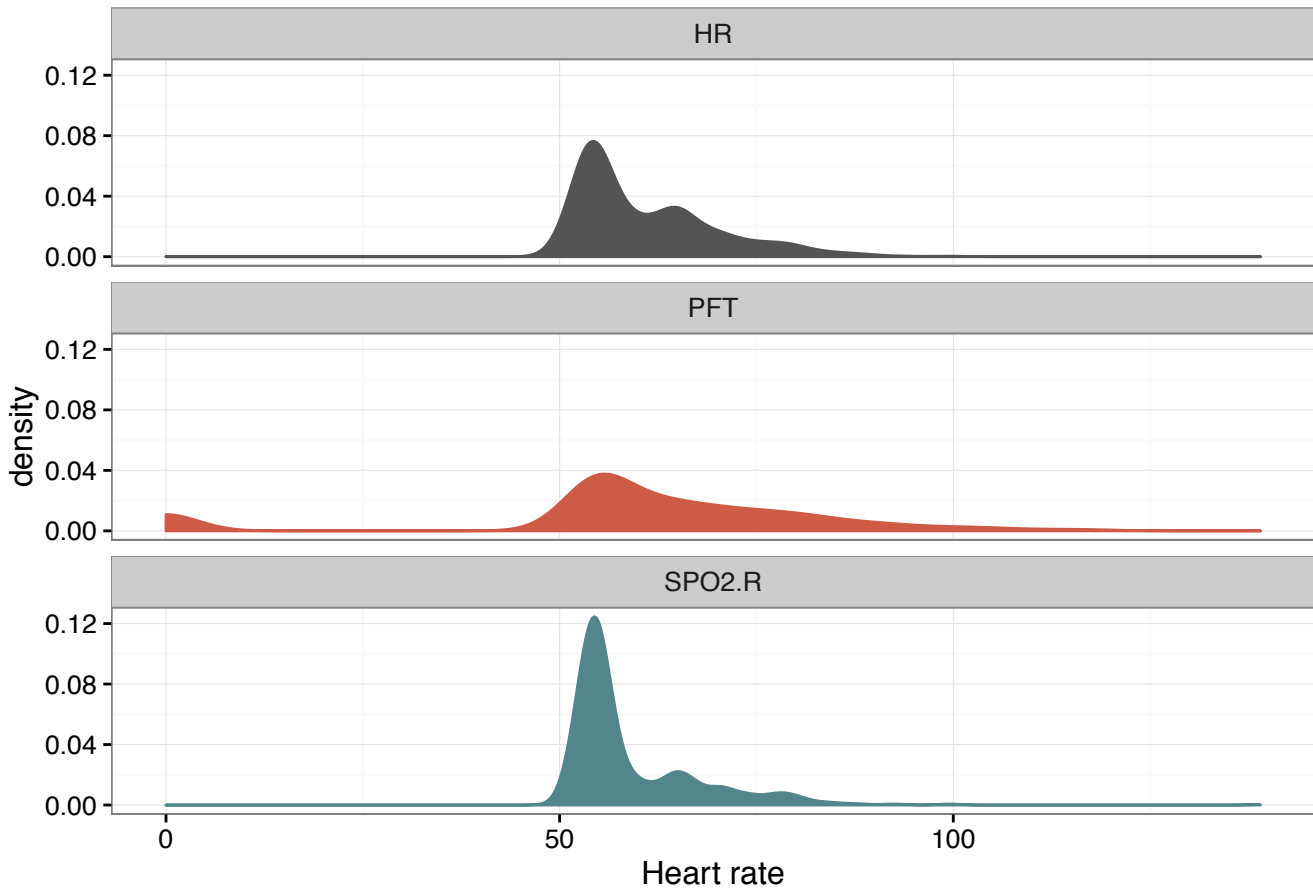

# W039

HR

0.06  
0.04  
0.02  
0.00

density

PFT

0.06  
0.04  
0.02  
0.00

SPO2.R

0.06  
0.04  
0.02  
0.00

50

70

90

110

Heart rate

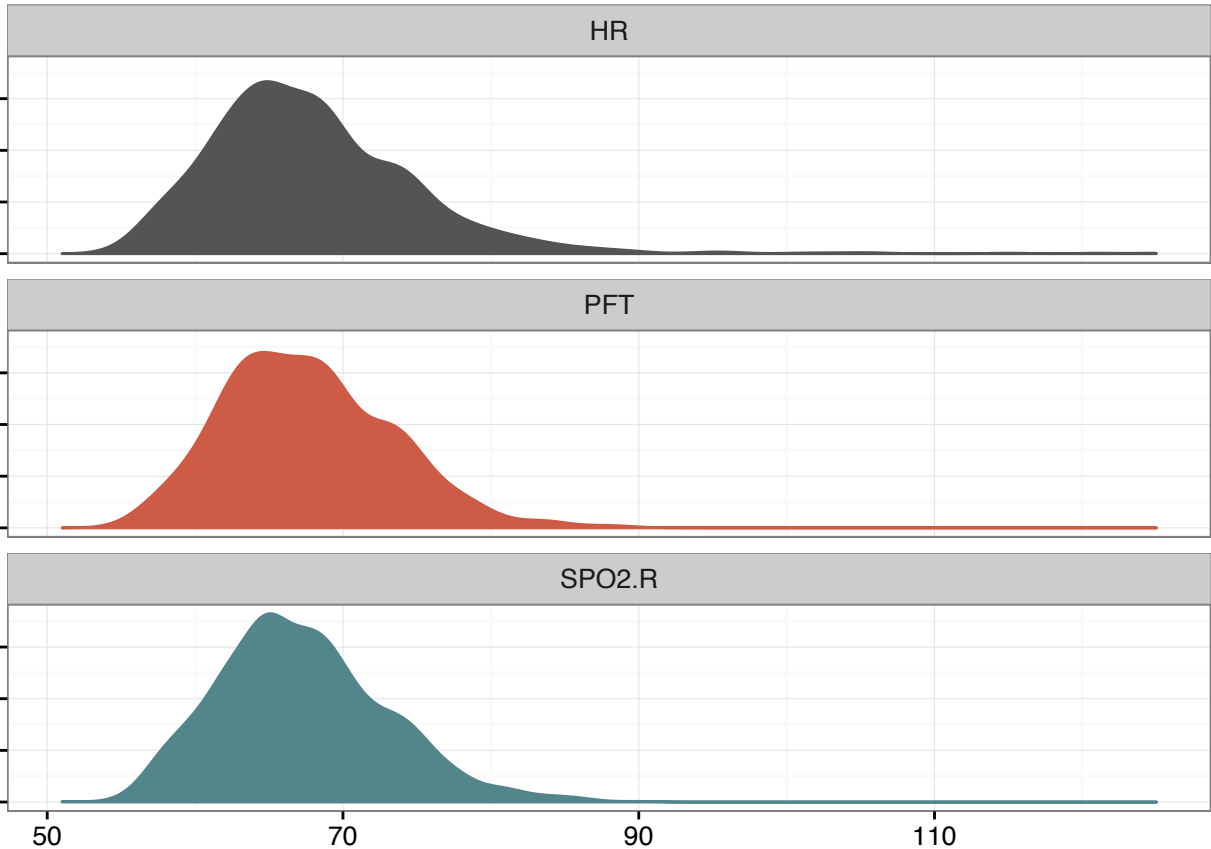

# W040

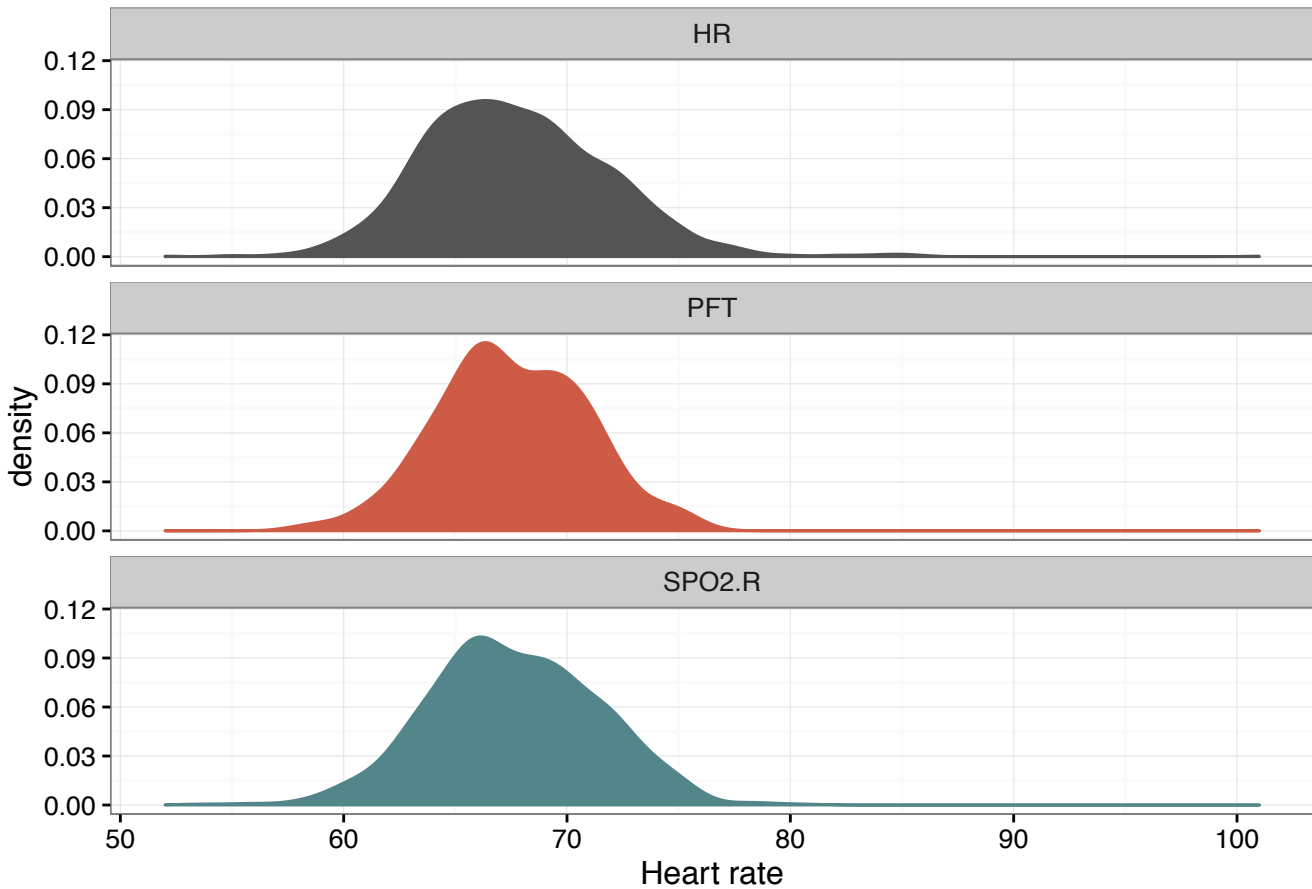

# W041

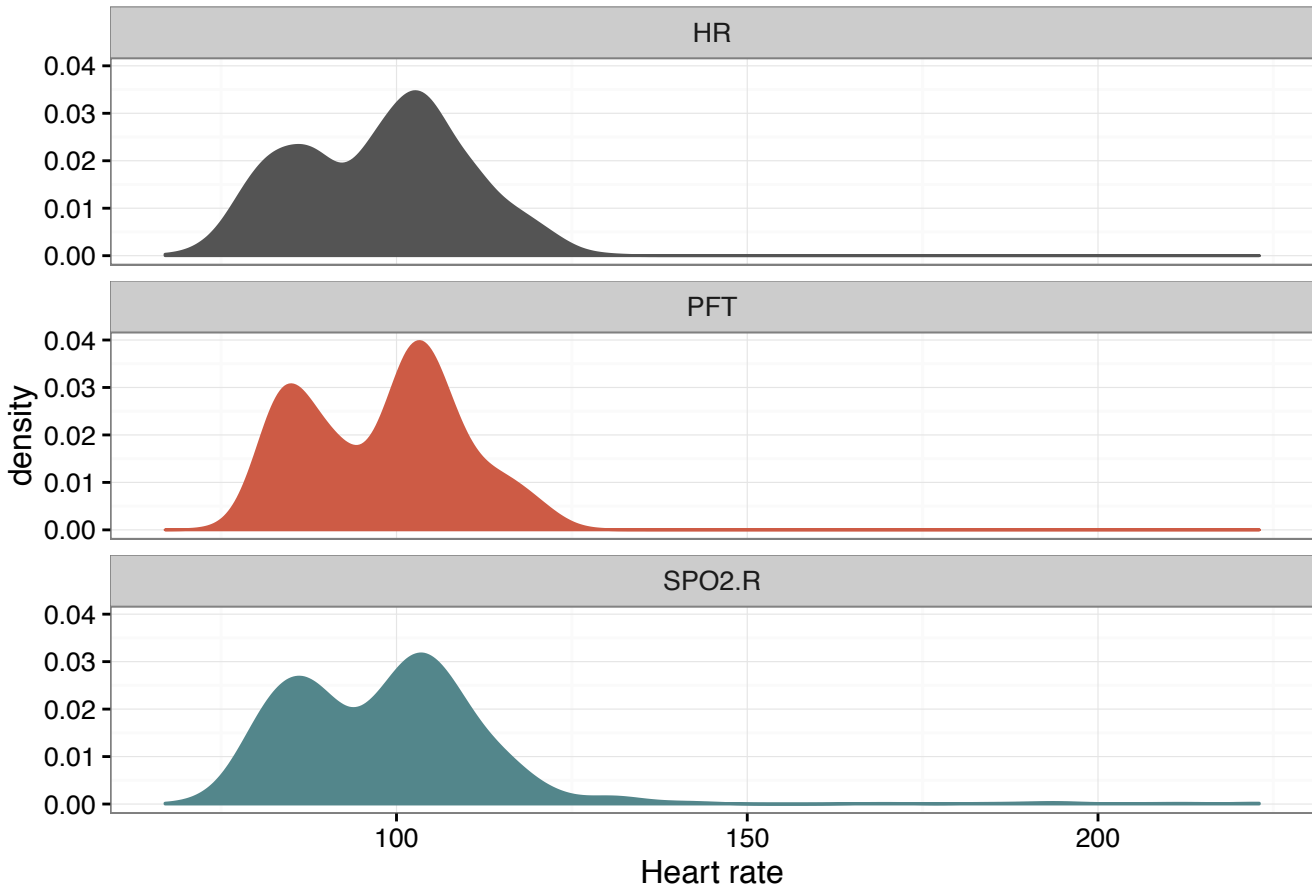

# W042

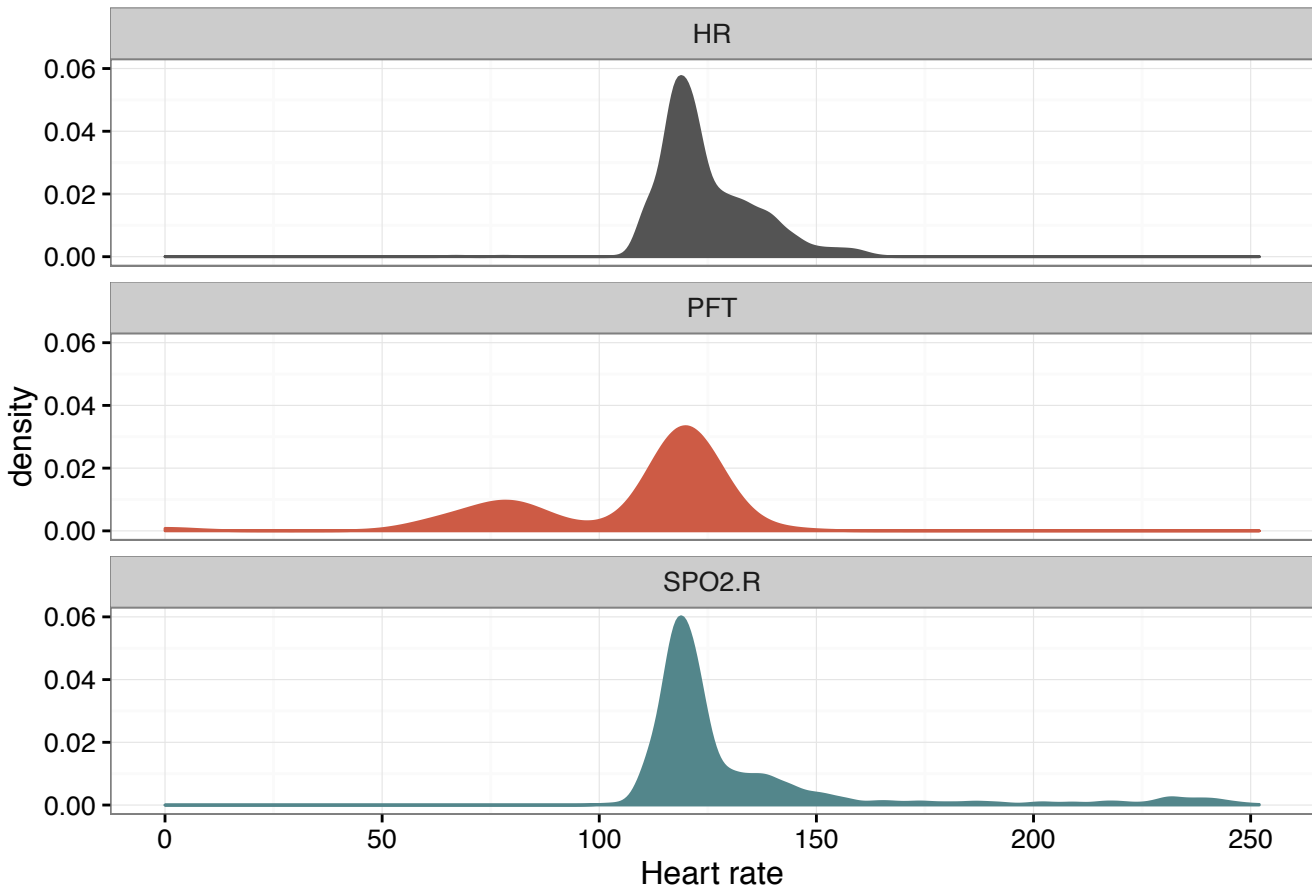



# W043

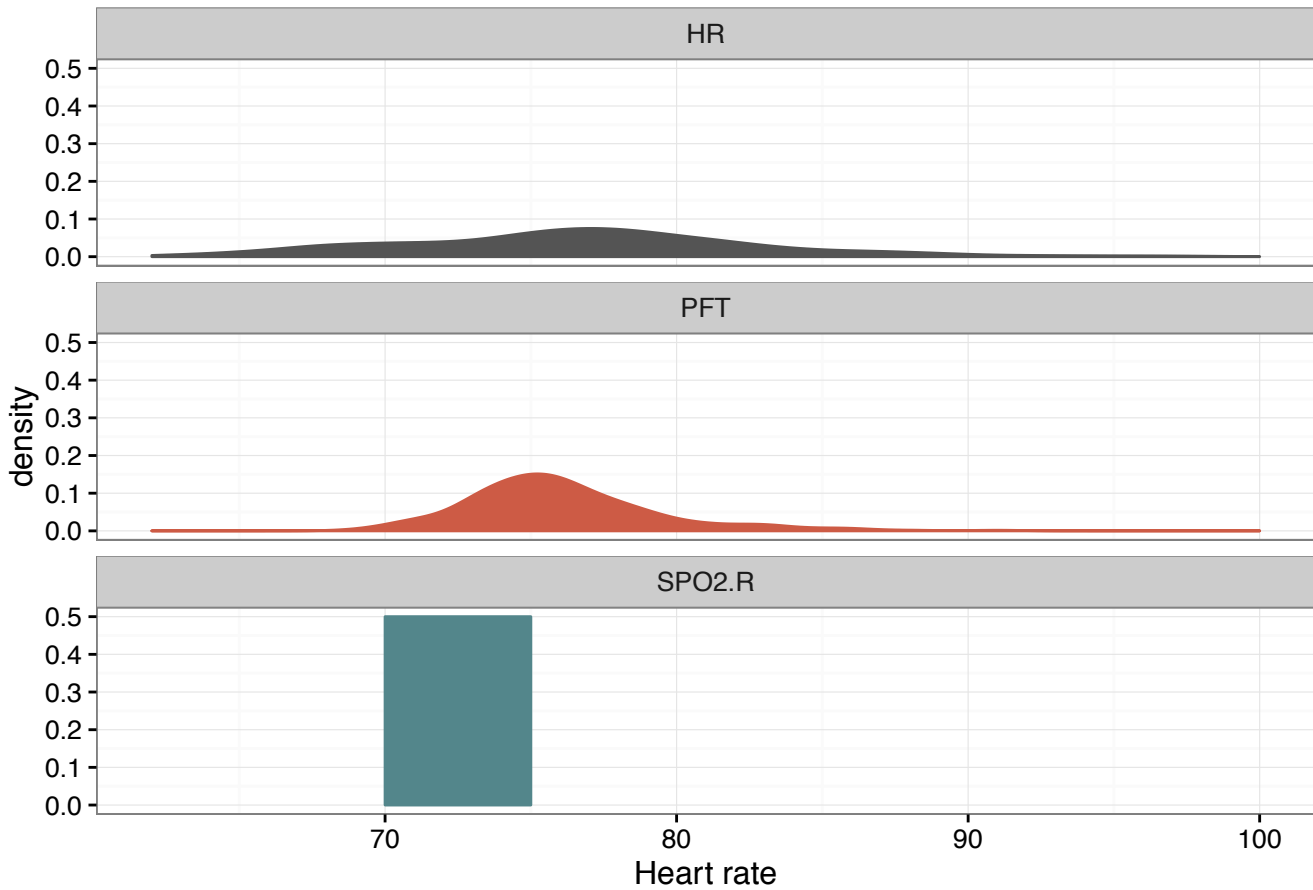

# W044

HR

0.075  
0.050  
0.025  
0.000

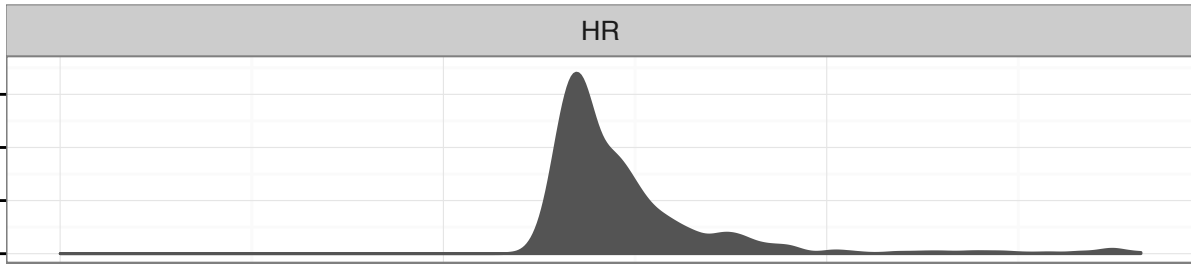

PFT

density

0.075  
0.050  
0.025  
0.000

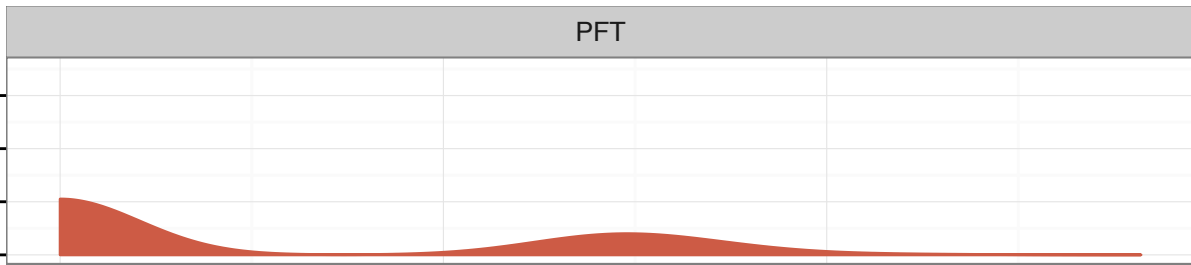

SPO2.R

0.075  
0.050  
0.025  
0.000

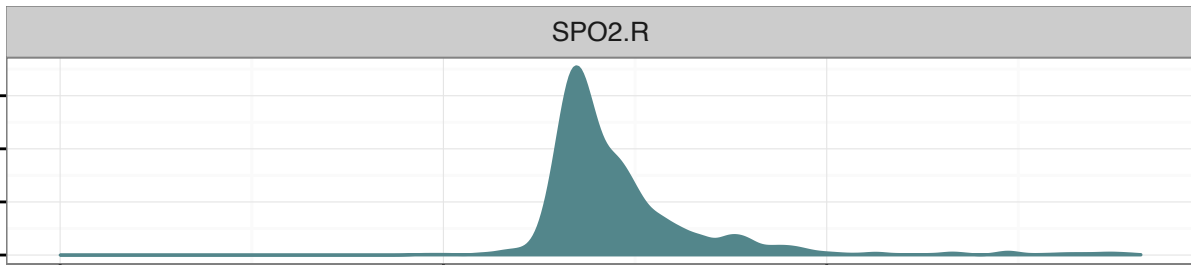

0

50

100

Heart rate

# W045

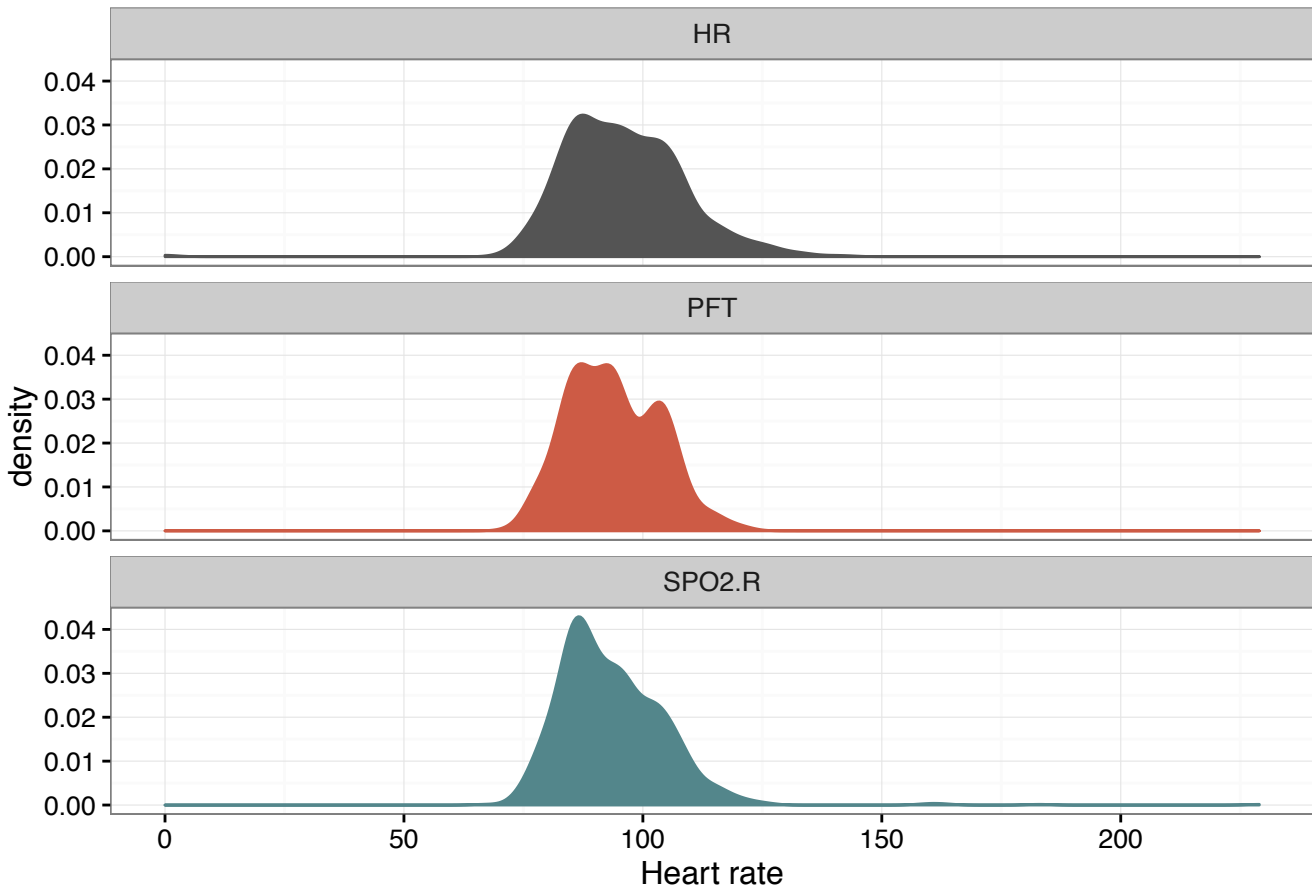

# W046

HR

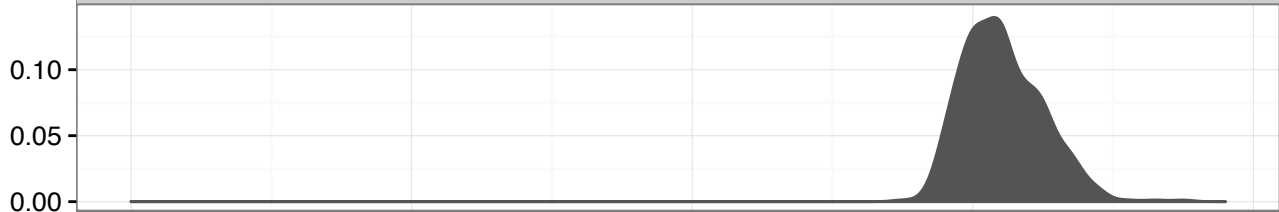

PFT

density

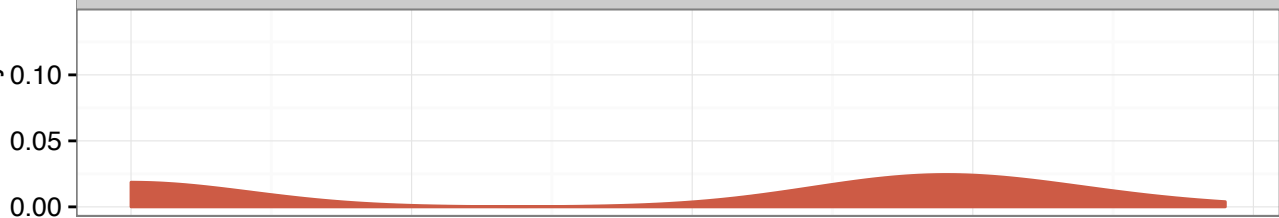

SPO2.R

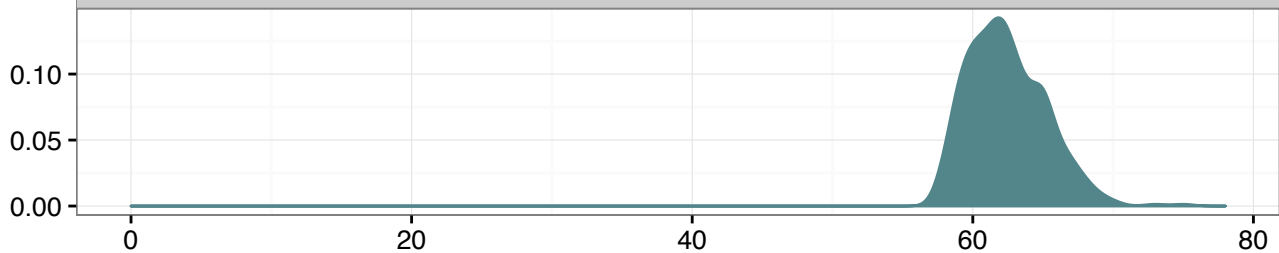

# W047

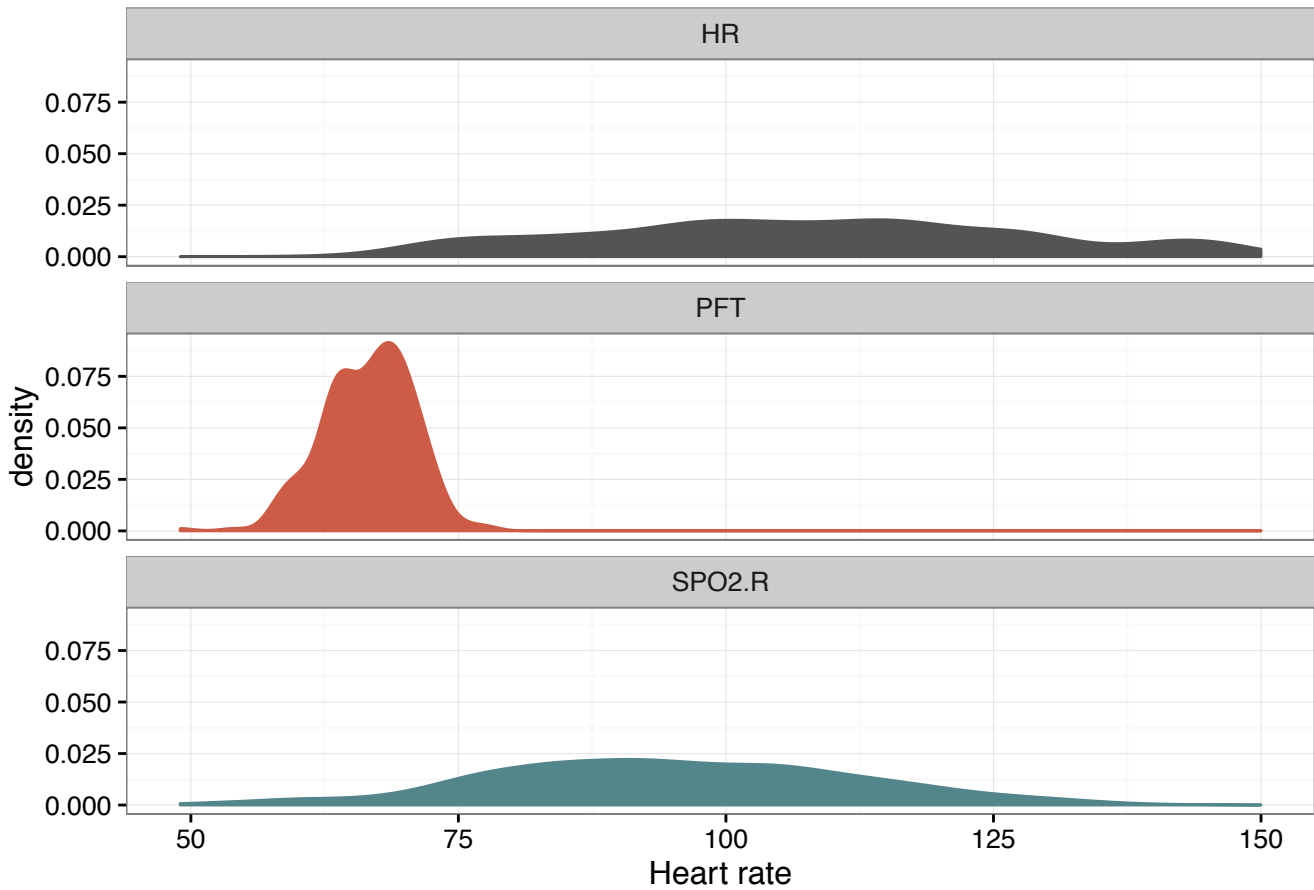

# W048

HR

0.10  
0.05  
0.00

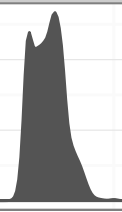

PFT

density  
0.10  
0.05  
0.00

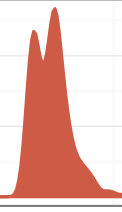

SPO2.R

0.10  
0.05  
0.00

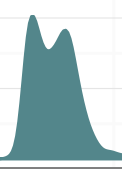

Heart rate

50

100

150

200

# W049

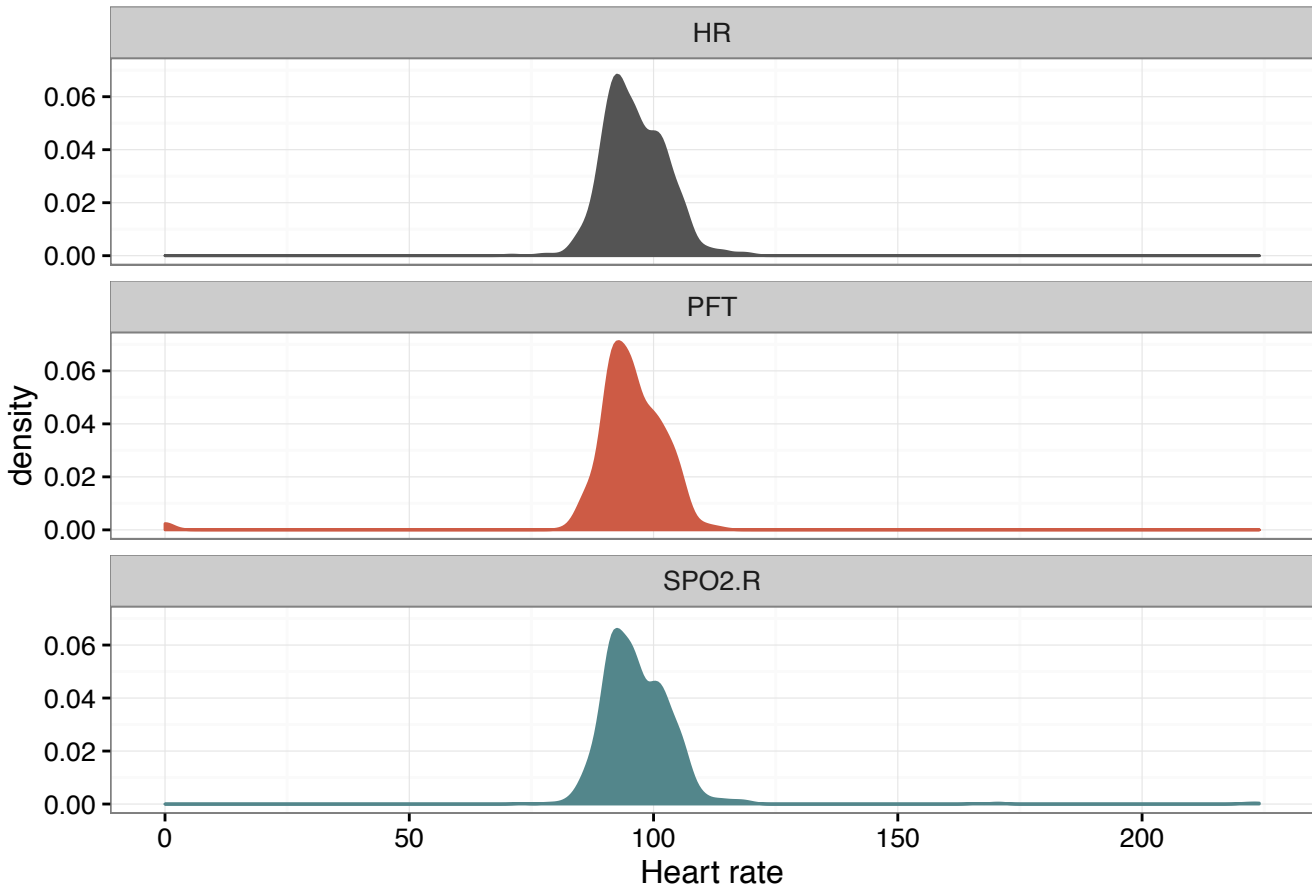

# W050

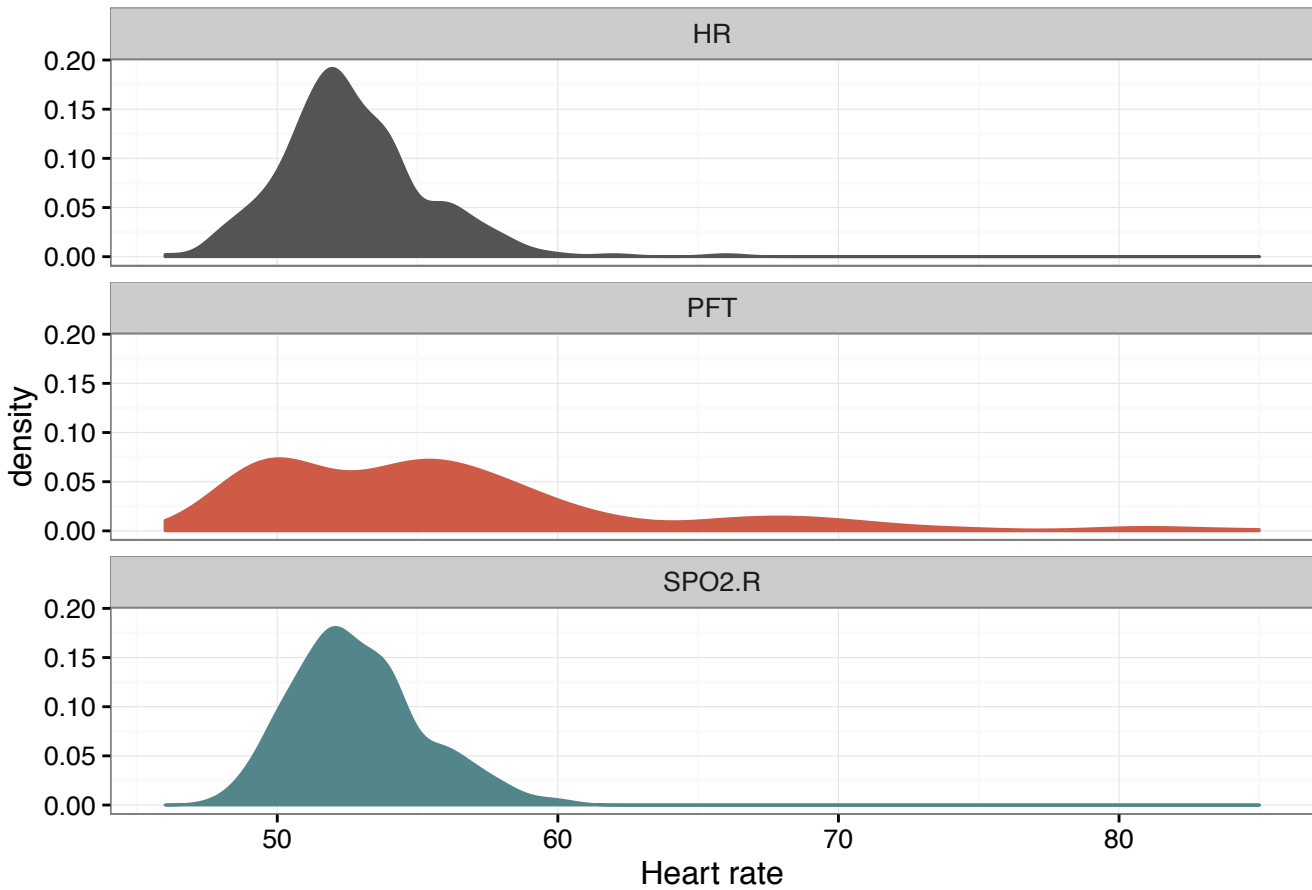



# W051

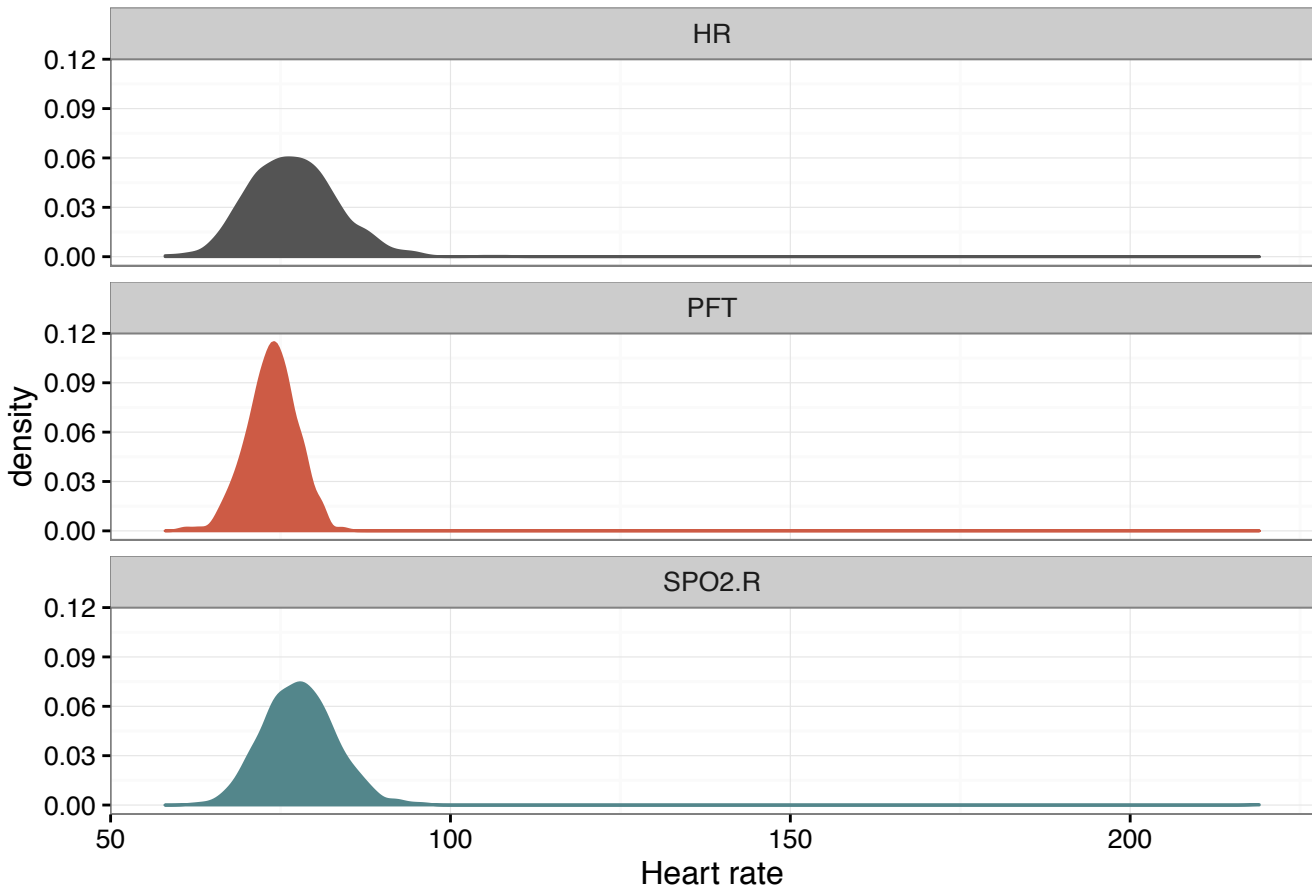

# W052

HR

0.10  
0.05  
0.00

PFT

density  
0.10  
0.05  
0.00

SPO2.R

0.10  
0.05  
0.00

0

50

100

Heart rate

density
