# Supplementary material for: Accuracy of a Wrist-Worn Wearable Device for Monitoring Heart Rates in Hospital Inpatients: A Prospective Observational Study
Source: PubMed Central journal article supplement (PMC5050383; doi:10.2196/jmir.6025), 2016-09-20
Supplement: jmir_v18i9e253_app2.pdf [file jmir_v18i9e253_app2.pdf]

**Supplementary Table 2.** Results from the pooled analysis of heart rate pairs. N.B. zeros in PFT = missing data

|                                | <b>PFT</b>                       | <b>SPO2.R</b>                    |
|--------------------------------|----------------------------------|----------------------------------|
| Pairs (n)                      | 12360                            | 56394                            |
| Median difference (bpm)        | 1                                | 0                                |
| IQR (bpm)                      | 5                                | 2                                |
| Correlation coefficient        | 0.74                             | 0.91                             |
| Wilcox p-value                 | 2.2E-16                          | 0.1837                           |
| <b>Bland Altman analysis</b>   |                                  |                                  |
| Mean difference (bpm)          | -4.7 (95% CI -4.91<br>to -4.44)  | -0.2 (95% CI -0.30<br>to -0.16)  |
| Lower limit of agreement (bpm) | -31 (95% CI -31.22<br>to -30.40) | -17 (95% CI<br>-17.01 to -16.77) |
| Upper limit of agreement (bpm) | 21 (95% CI 21.06<br>to 21.87)    | 16 (95% CI 16.31<br>to 16.55)    |
